# Supplementary material for: CHASE-PL Climate Projection dataset over Poland – Bias adjustment of EURO-CORDEX simulations
Source: Copernicus journal article supplement (doi:10.5194/essd-2017-51), 2017-07-19
Supplement: Supplementary file 1 [file essd-2017-51-supplement.zip]

Archive with 1 entries (1 files):
- template.pdf
