# Supplementary material for: CHASE-PL Climate Projection dataset over Poland – Bias adjustment of EURO-CORDEX simulations
Source: Copernicus journal article supplement (doi:10.5194/essd-2017-51), 2017-07-19
Supplement: Supplementary file 1 [file essd-2017-51-supplement.zip › template.pdf]

# Supplementary material for "CHASE-PL Climate Projection dataset over Poland–Bias adjustment of EURO-CORDEX simulations–Atlas for precipitation"

Abdelkader Mezghani<sup>1</sup>, Andreas Dobler<sup>1</sup>, Jan Erik Haugen<sup>1</sup>, Rasmus E. Benestad<sup>1</sup>, Mikołaj Piniewski<sup>2,3</sup>, Ignacy Kardel<sup>2</sup>, and Zbigniew W. Kundzewicz<sup>3</sup>

<sup>1</sup>Norwegian Meteorological Institute, PO.BOX. 43 0313 Blindern, Norway

<sup>2</sup>Department of Hydraulic Engineering, Warsaw University of Life Sciences, Nowoursynowska 166, 02-787 Warsaw, Poland

<sup>3</sup>Potsdam Institute for Climate Impact Research, Telegrafenberg, 14473 Potsdam, Germany

*Correspondence to:* Abdelkader Mezghani (abdelkaderm@met.no)

**Abstract.** This supporting document includes additional figures to the main paper 'CHASE-PL Climate Projection dataset over Poland - Bias adjustment of EURO-CORDEX simulations.'

## 1 Introduction

The CHASE-PL dataset contains nine model bias corrected simulations from the EURO-CORDEX initiative. The nine bias adjusted simulations ( $N_{SIM}$ ) cover four essential climatic variables ( $N_{ECV} =$  5 4) such as daily precipitation and daily minimum, maximum, and averaged temperature projected into two future time horizons ( $N_{HORIZONS} = 2$ ) and assuming the two RCP4.5 and RCP8.5 scenarios ( $N_{RCPs} = 2$ ). We assessed seasonal and annual aggregates ( $N_{TAGG} = 5$ ) of the climate parameters which yielded to analyze  $N_{SIM} \times N_{ECV} \times N_{SEAS} \times N_{HORIZONS} \times N_{RCPs} = 9 \times 4 \times 5 \times 2 \times 2 =$  10 720 maps of projections. For that reason, the Climate Impact Geoportal (ClimateImpact.sggw.pl) was developed within the CHASE-PL project which present an alternative for producing interactive maps of projections with a zoom on Poland. In this supporting material, we only present some of the full catalogue of maps.

## 2 Evaluation of the bias in raw simulations

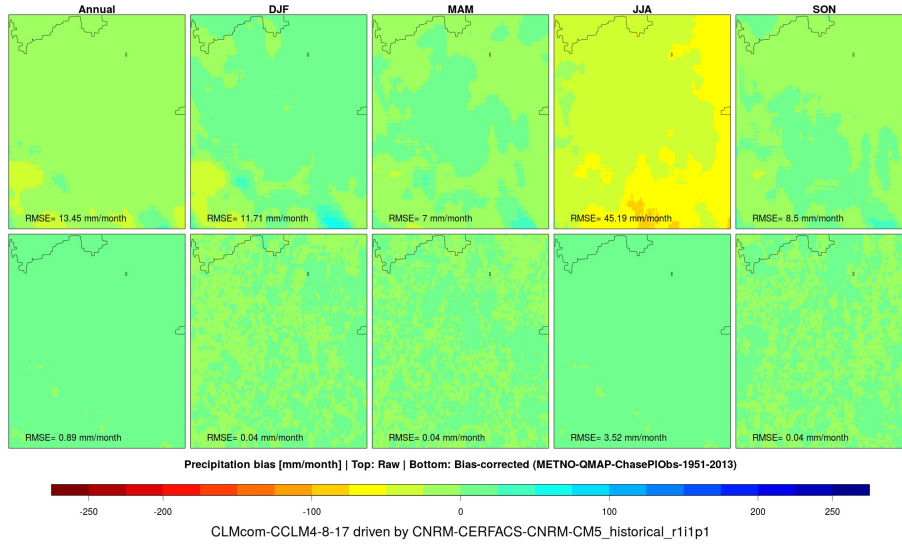

**SM 1.** Bias in modelled precipitation (mm/month) by simulation 1. The bias is computed as the difference between historical simulations and observations for both raw (top) and bias adjusted (bottom) data, respectively. The RMSE indicates the root mean square values of the bias averaged over the whole spatial domain.

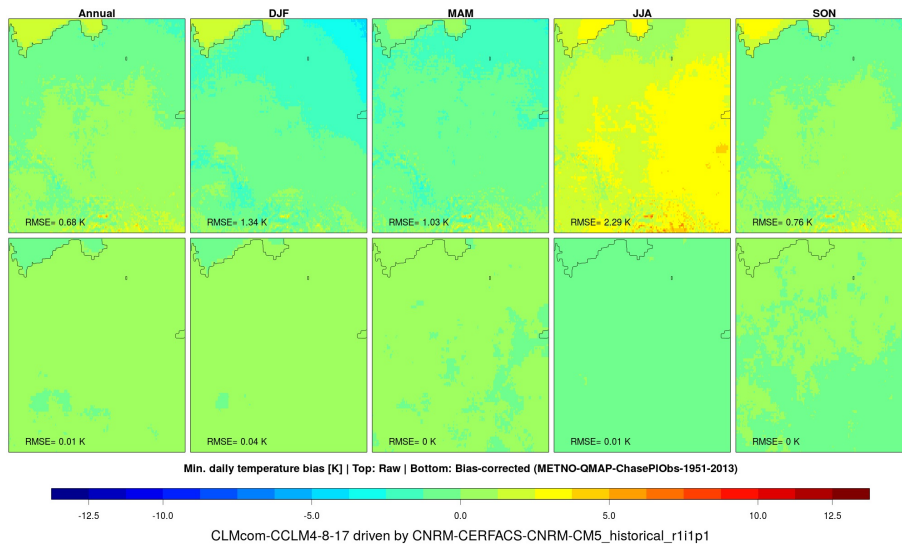

**SM 2.** Same caption as in SM 1 but for modelled minimum temperature ( $^{\circ}\text{C}$ ).

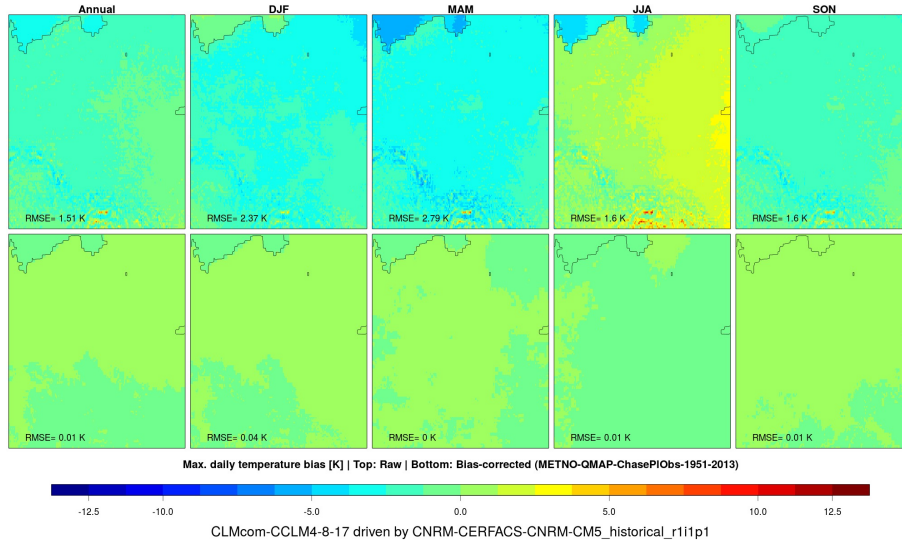

**SM 3.** Same caption as in SM 1 but for modelled maximum temperature ( $^{\circ}\text{C}$ ).

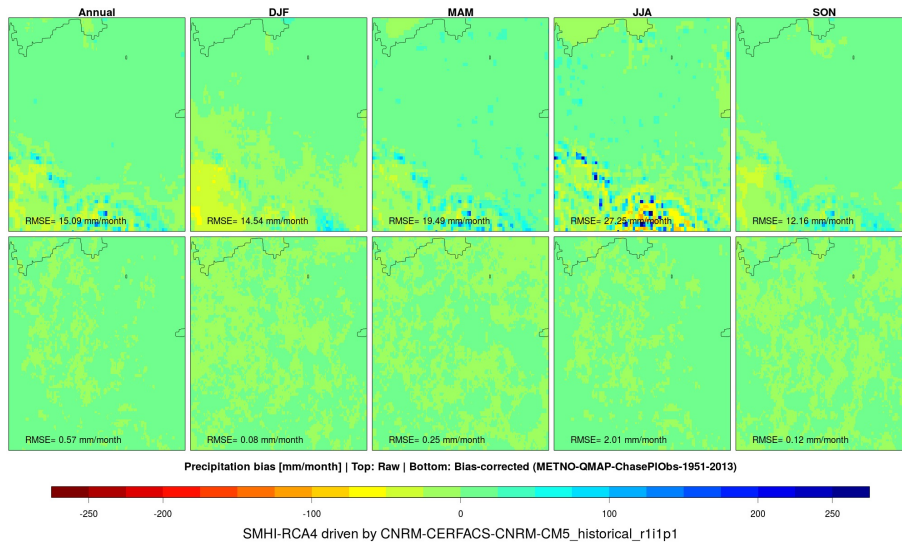

**SM 4.** Bias in modelled precipitation (mm/month) by simulation 2. The bias is computed as the difference between historical simulations and observations for both raw (top) and bias adjusted (bottom) data, respectively. The RMSE indicates the root mean square values of the bias averaged over the whole spatial domain.

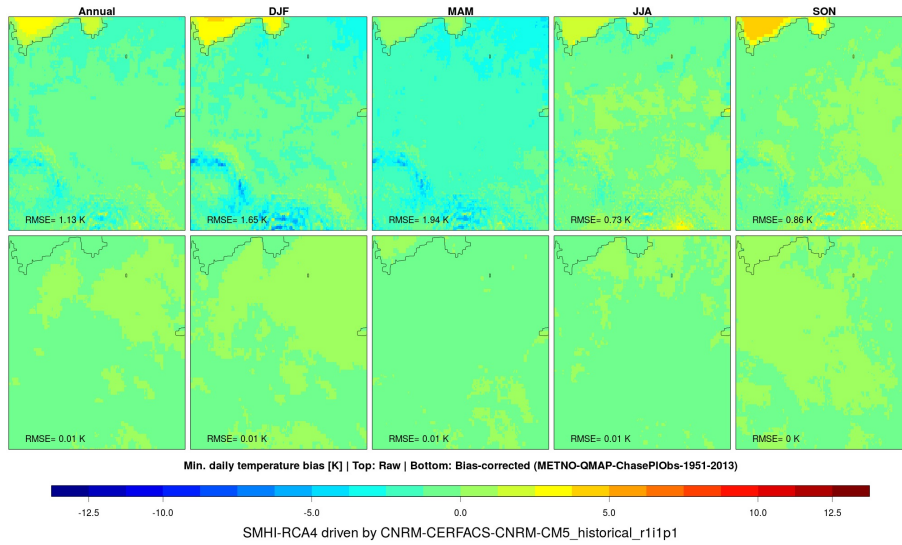

**SM 5.** Same caption as in SM 4 but for modelled minimum temperature ( $^{\circ}\text{C}$ ).

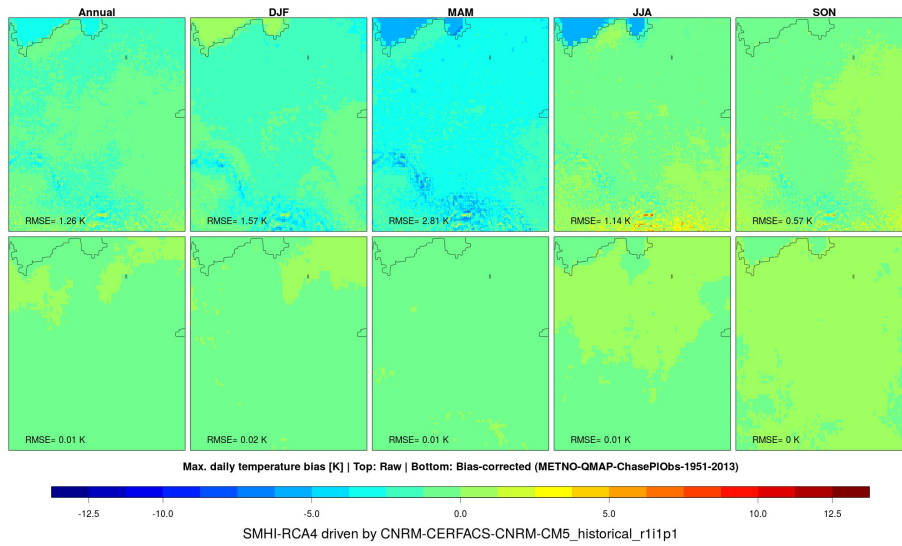

**SM 6.** Same caption as in SM 4 but for modelled maximum temperature ( $^{\circ}\text{C}$ ).

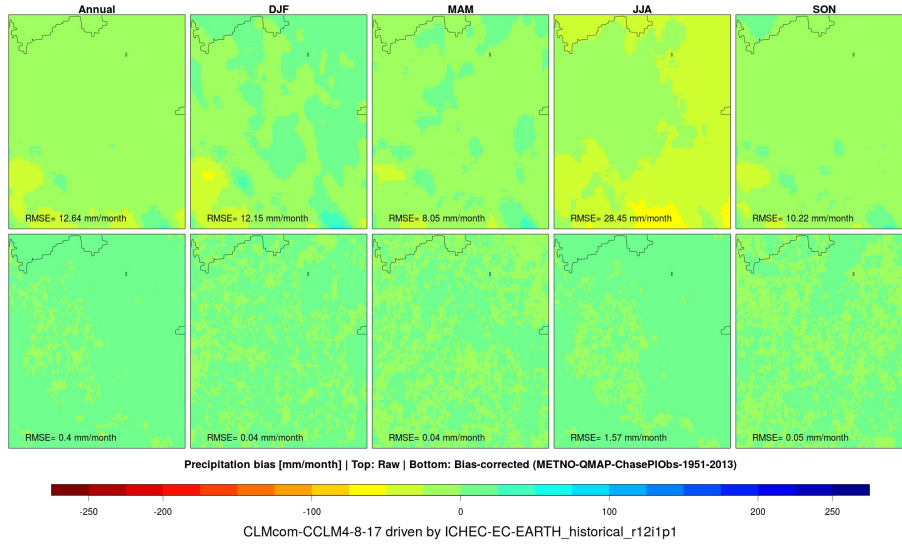

**SM 7.** Bias in modelled precipitation (mm/month) by simulation 3. The bias is computed as the difference between historical simulations and observations for both raw (top) and bias adjusted (bottom) data, respectively. The RMSE indicates the root mean square values of the bias averaged over the whole spatial domain.

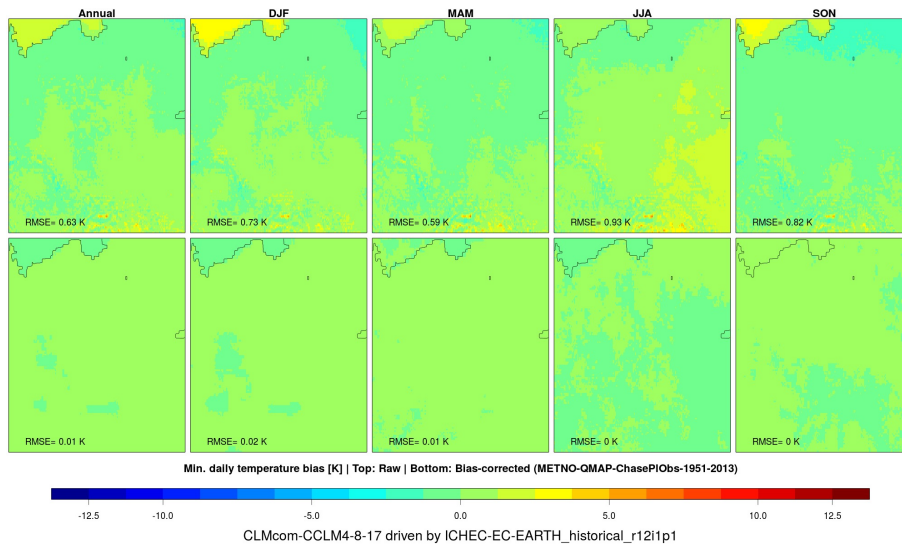

**SM 8.** Same caption as in SM 7 but for modelled minimum temperature ( $^{\circ}\text{C}$ ).

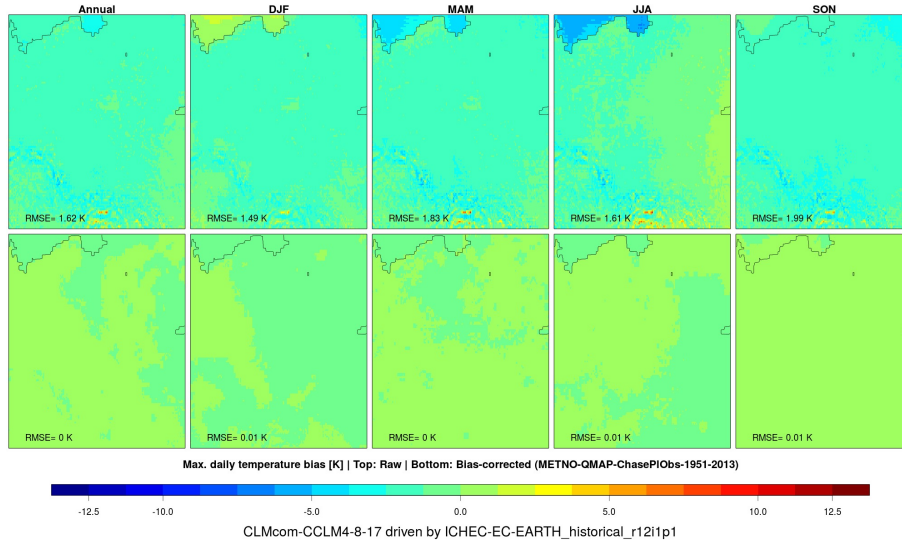

**SM 9.** Same caption as in SM 7 but for modelled maximum temperature ( $^{\circ}\text{C}$ ).

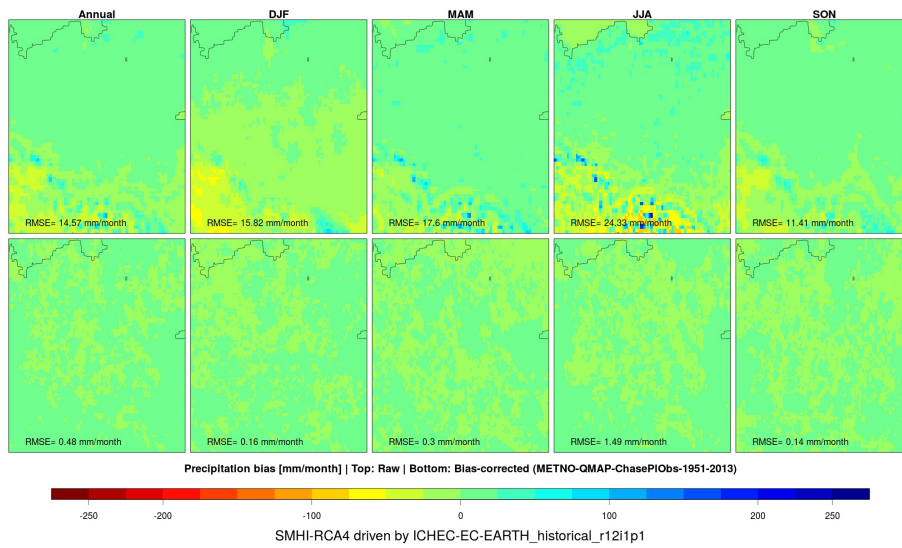

**SM 10.** Bias in modelled precipitation (mm/month) by simulation 4. The bias is computed as the difference between historical simulations and observations for both raw (top) and bias adjusted (bottom) data, respectively. The RMSE indicates the root mean square values of the bias averaged over the whole spatial domain.

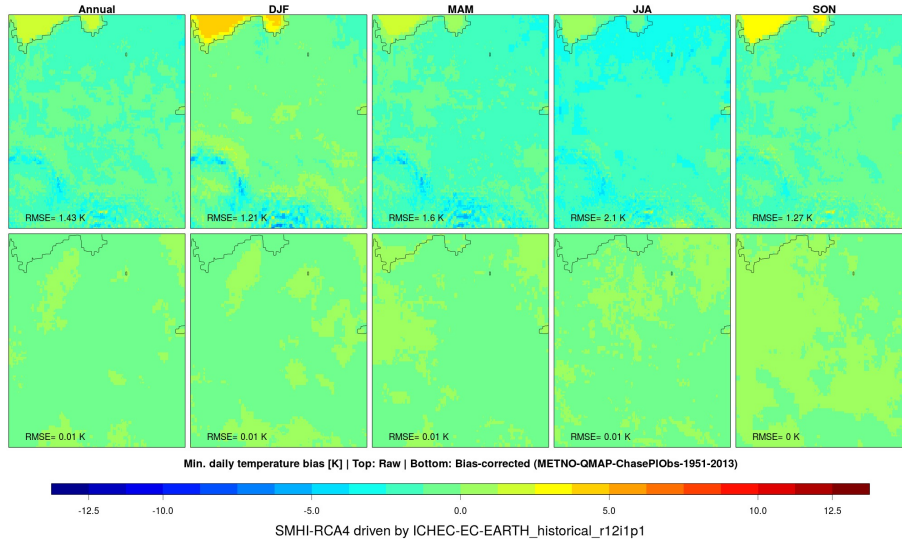

**SM 11.** Same caption as in SM 10 but for modelled minimum temperature ( $^{\circ}\text{C}$ ).

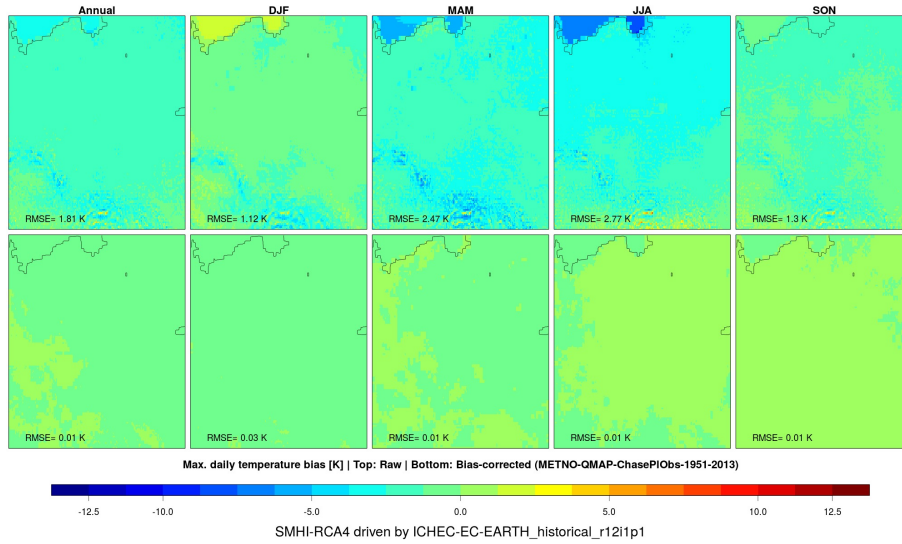

**SM 12.** Same caption as in SM 10 but for modelled maximum temperature ( $^{\circ}\text{C}$ ).

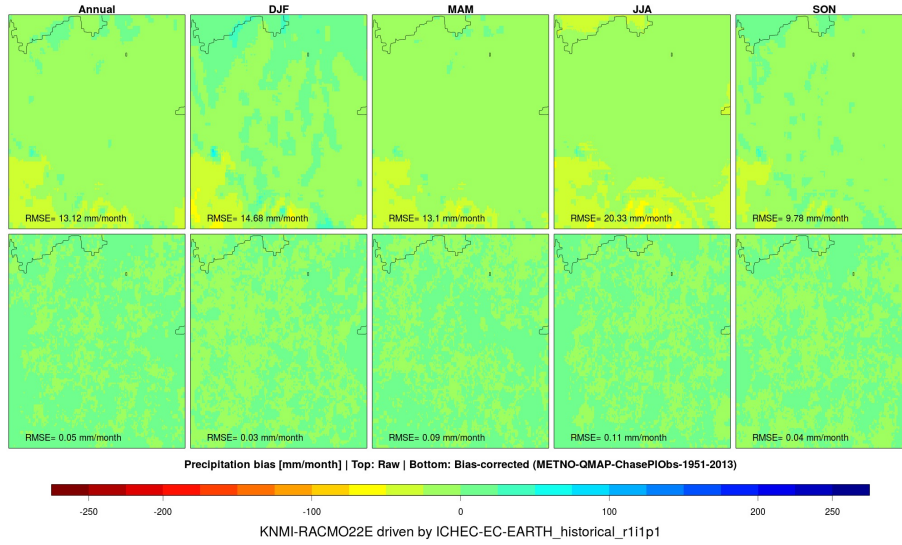

**SM 13.** Bias in modelled precipitation (mm/month) by simulation 5. The bias is computed as the difference between historical simulations and observations for both raw (top) and bias adjusted (bottom) data, respectively. The RMSE indicates the root mean square values of the bias averaged over the whole spatial domain.

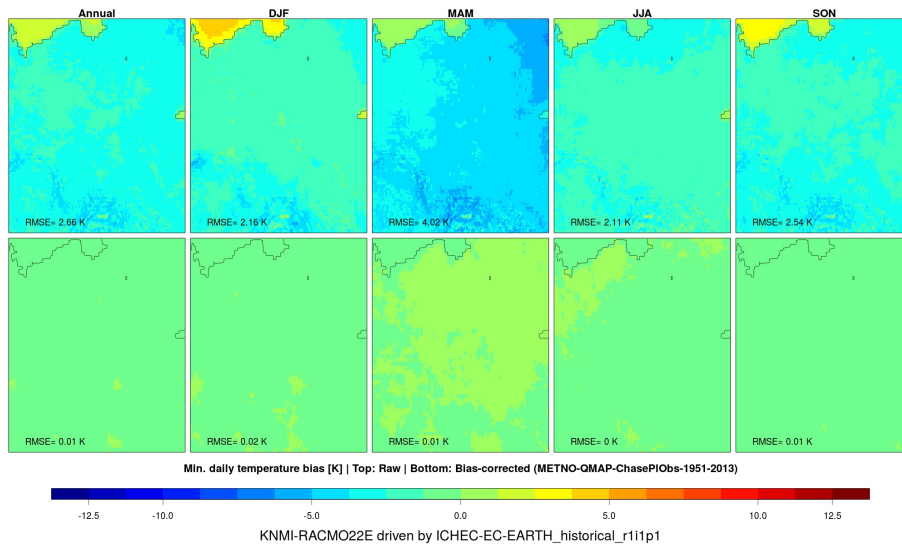

**SM 14.** Same caption as in SM 13 but for modelled minimum temperature (°C).

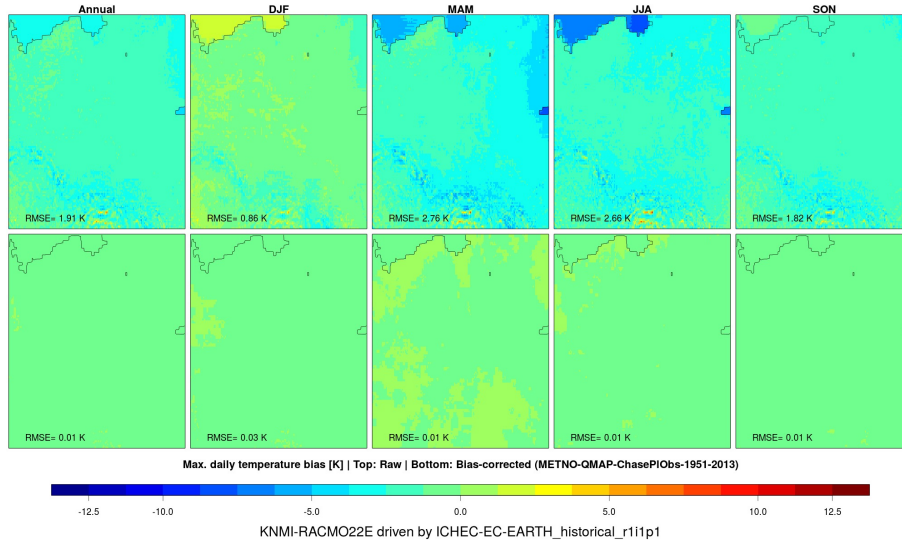

**SM 15.** Same caption as in SM 13 but for modelled maximum temperature ( $^{\circ}\text{C}$ ).

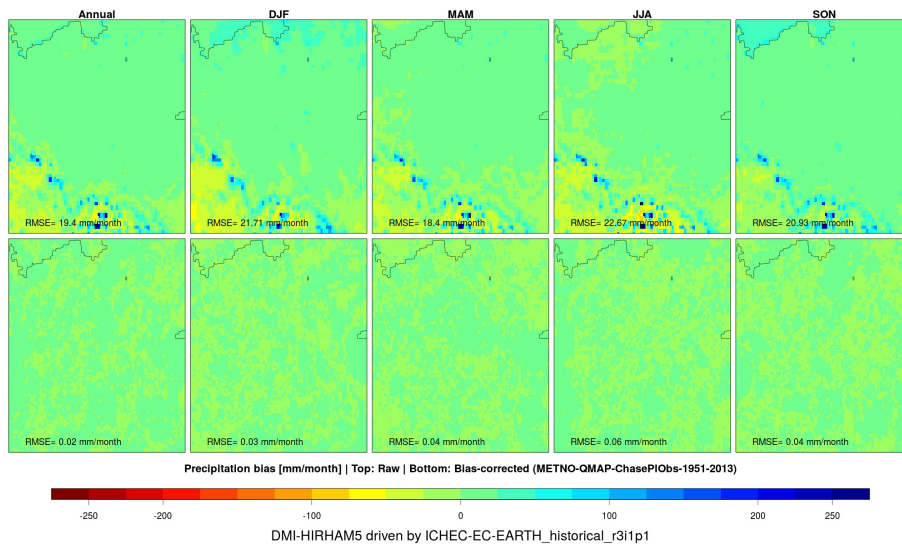

**SM 16.** Bias in modelled precipitation (mm/month) by simulation 6. The bias is computed as the difference between historical simulations and observations for both raw (top) and bias adjusted (bottom) data, respectively. The RMSE indicates the root mean square values of the bias averaged over the whole spatial domain.

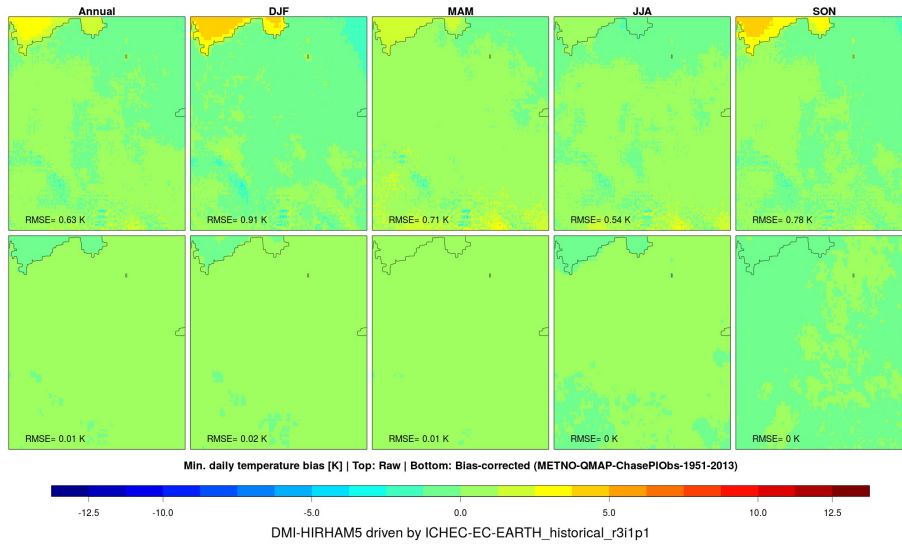

**SM 17.** Same caption as in SM 16 but for modelled minimum temperature ( $^{\circ}\text{C}$ ).

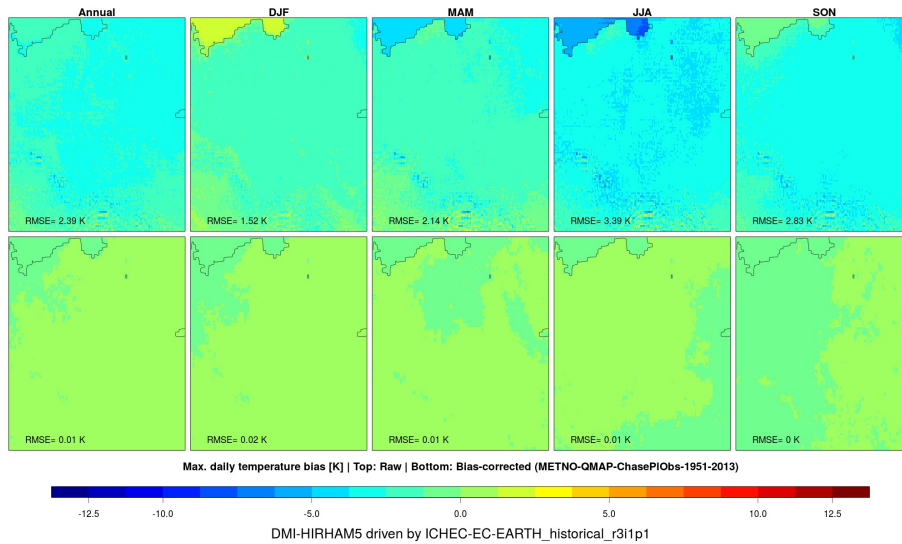

**SM 18.** Same caption as in SM 16 but for but for modelled maximum temperature ( $^{\circ}\text{C}$ ).

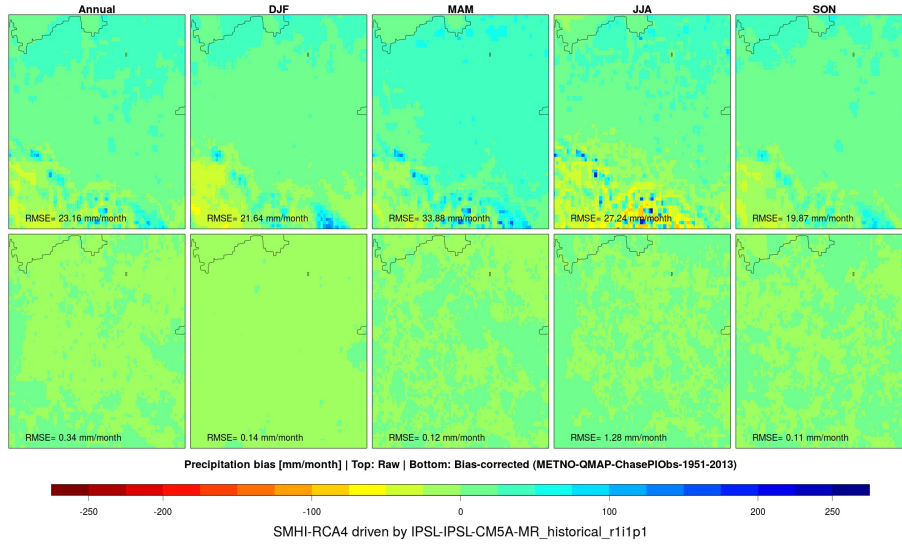

**SM 19.** Bias in modelled precipitation (mm/month) by simulation 7. The bias is computed as the difference between historical simulations and observations for both raw (top) and bias adjusted (bottom) data, respectively. The RMSE indicates the root mean square values of the bias averaged over the whole spatial domain.

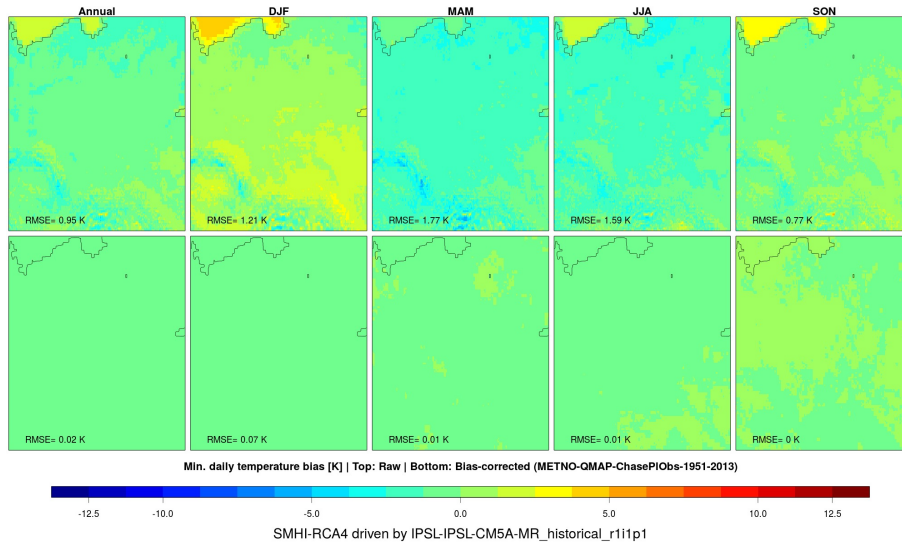

**SM 20.** Same caption as in SM 19 but for but for modelled minimum temperature ( $^{\circ}\text{C}$ ).

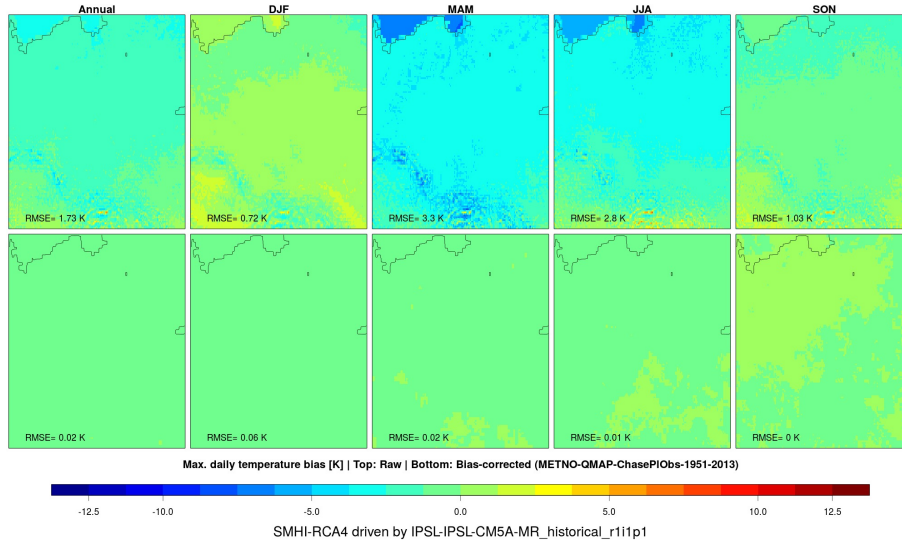

**SM 21.** Same caption as in SM 19 but for but for modelled maximum temperature ( $^{\circ}\text{C}$ ).

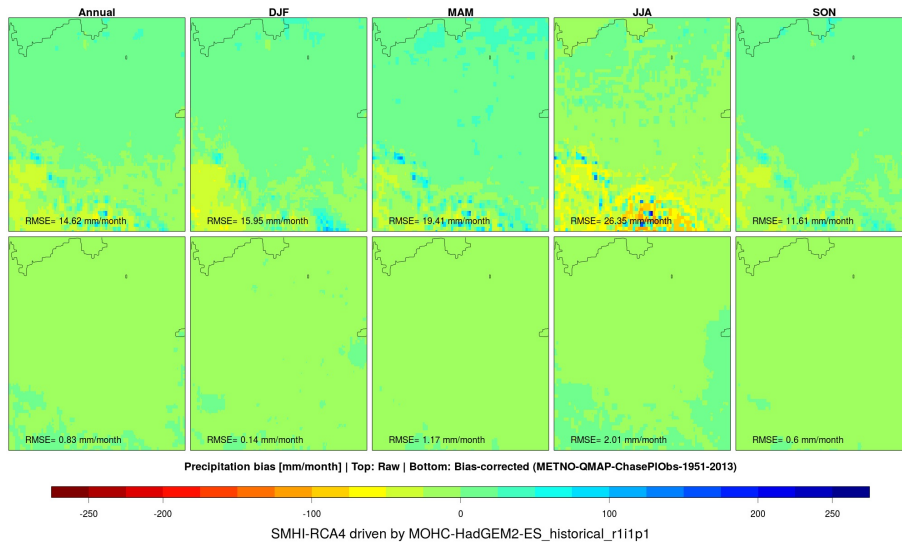

**SM 22.** Bias in modelled precipitation (mm/month) by simulation 8. The bias is computed as the difference between historical simulations and observations for both raw (top) and bias adjusted (bottom) data, respectively. The RMSE indicates the root mean square values of the bias averaged over the whole spatial domain.

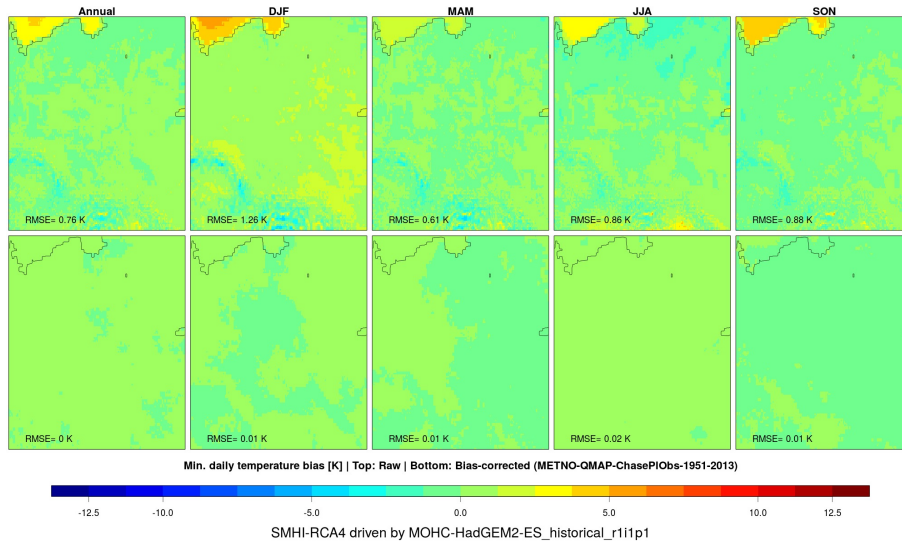

**SM 23.** Same caption as in SM 22 but for but for modelled minimum temperature ( $^{\circ}\text{C}$ ).

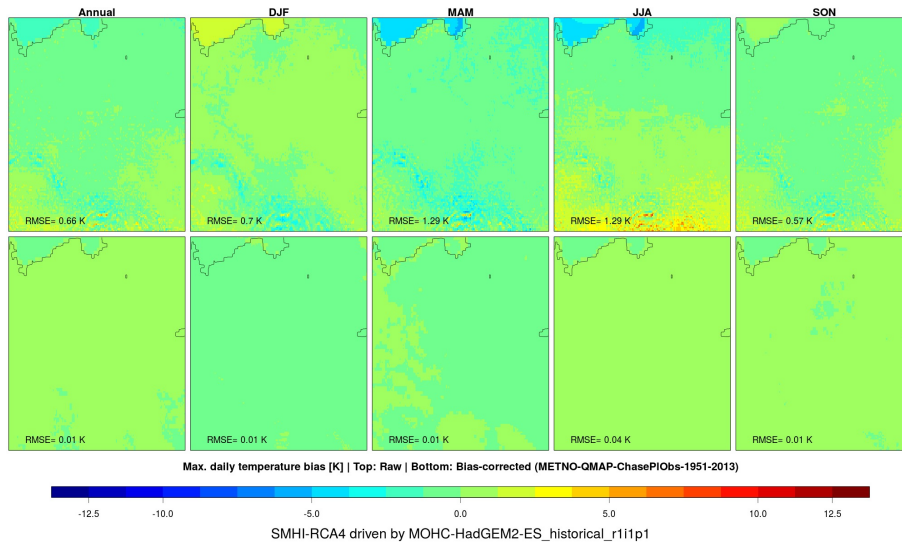

**SM 24.** Same caption as in SM 22 but for but for modelled maximum temperature ( $^{\circ}\text{C}$ ).

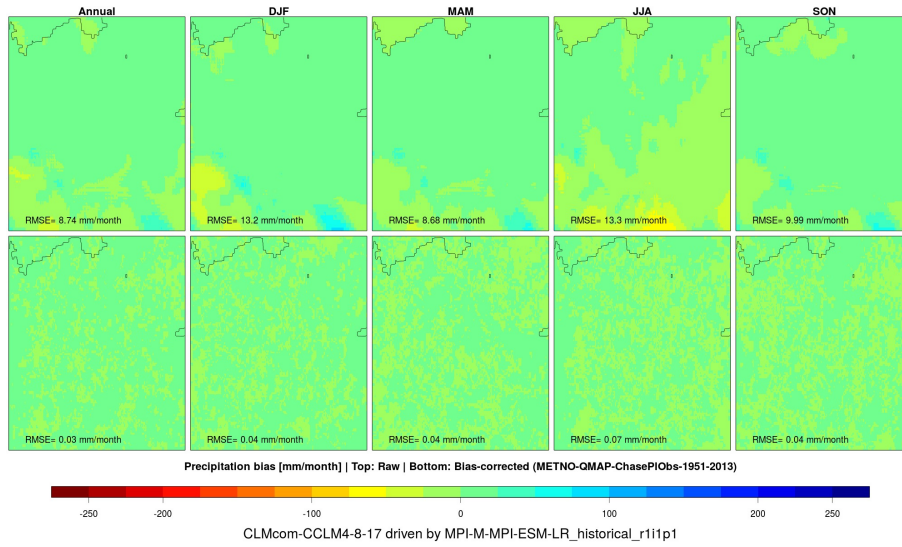

**SM 25.** Bias in modelled precipitation (mm/month) by simulation 9. The bias is computed as the difference between historical simulations and observations for both raw (top) and bias adjusted (bottom) data, respectively. The RMSE indicates the root mean square values of the bias averaged over the whole spatial domain.

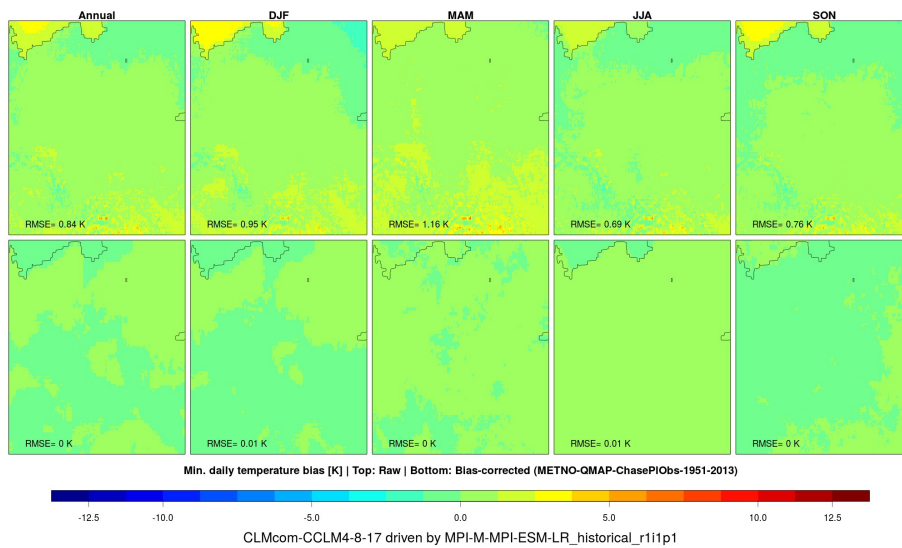

**SM 26.** Same caption as in SM 25 but for modelled minimum temperature ( $^{\circ}\text{C}$ ).

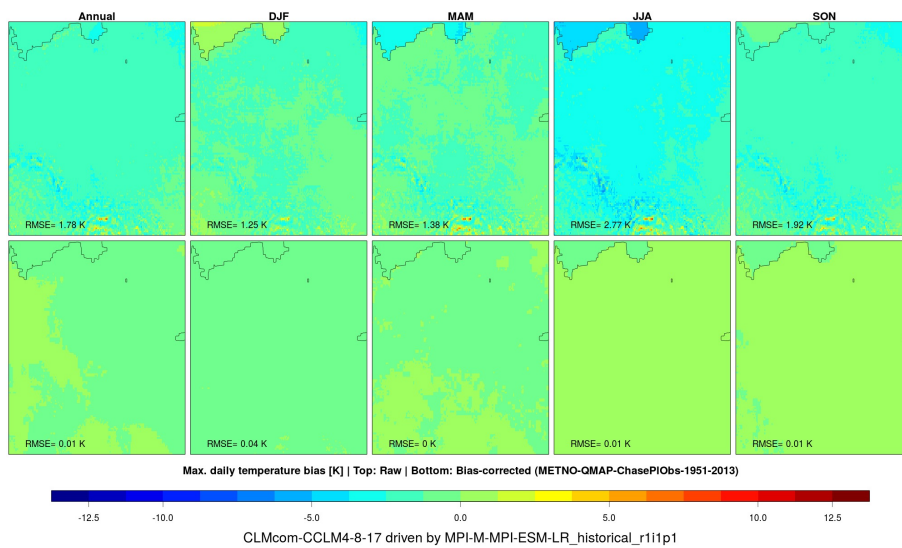

**SM 27.** Same caption as in SM 25 but for modelled maximum temperature ( $^{\circ}\text{C}$ ).

### 15 3 Sensitivity to the climate change signal

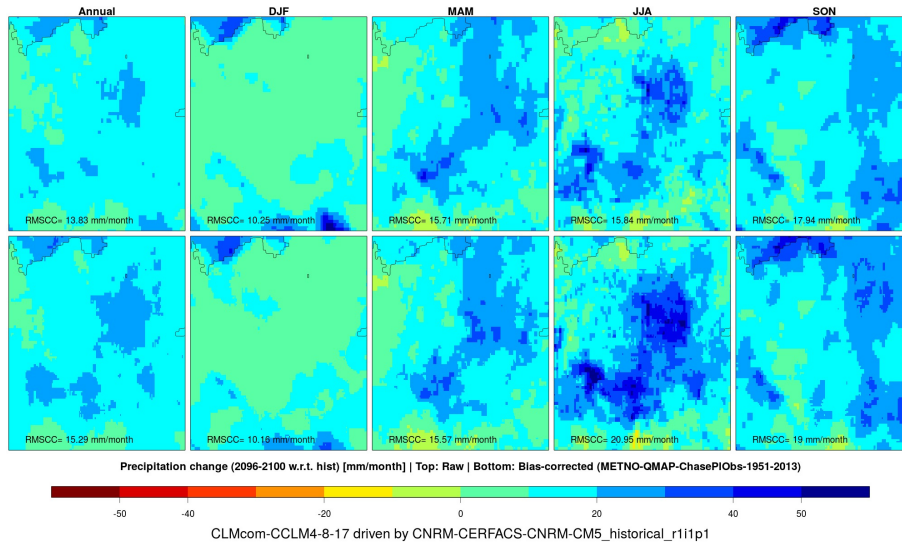

**SM 28.** Precipitation change signal (mm/month) for simulation 1. Absolute changes in future (2096–2100) with regards to historical simulations for both raw (top) and bias adjusted (bottom) data, respectively. The RMSCC indicates the root mean square values of the climate change estimated over the whole spatial domain.

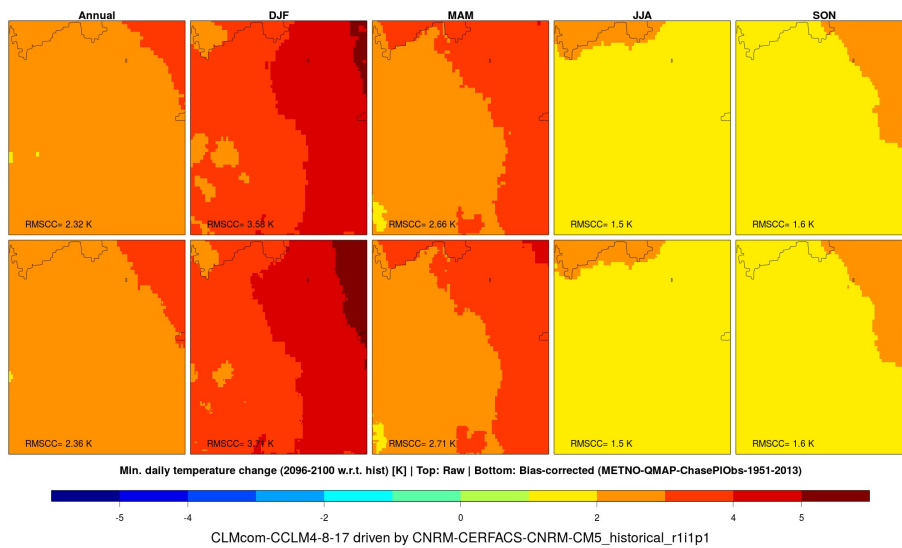

**SM 29.** Same caption as in SM 28 but for absolute changes in minimum temperature (°C).

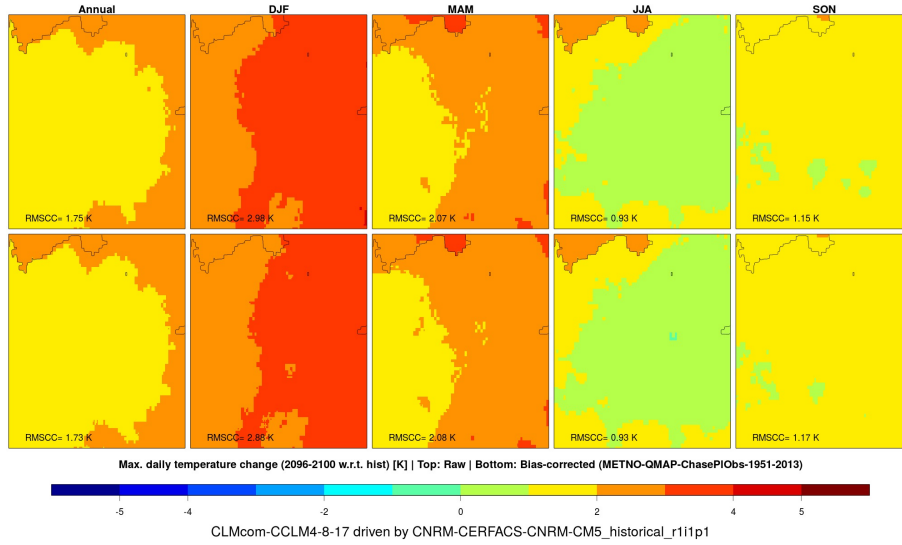

**SM 30.** Same caption as in SM 28 but for absolute changes in maximum temperature ( $^{\circ}\text{C}$ ).

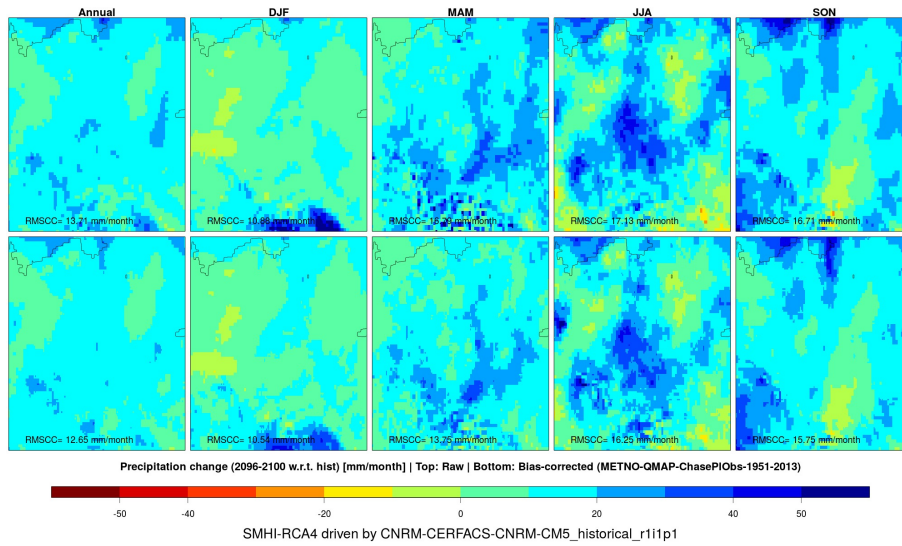

**SM 31.** Precipitation change signal (mm/month) for simulation 2. Absolute changes in future (2096–2100) with regards to historical simulations for both raw (top) and bias adjusted (bottom) data, respectively. The RMSCC indicates the root mean square values of the climate change estimated over the whole spatial domain.

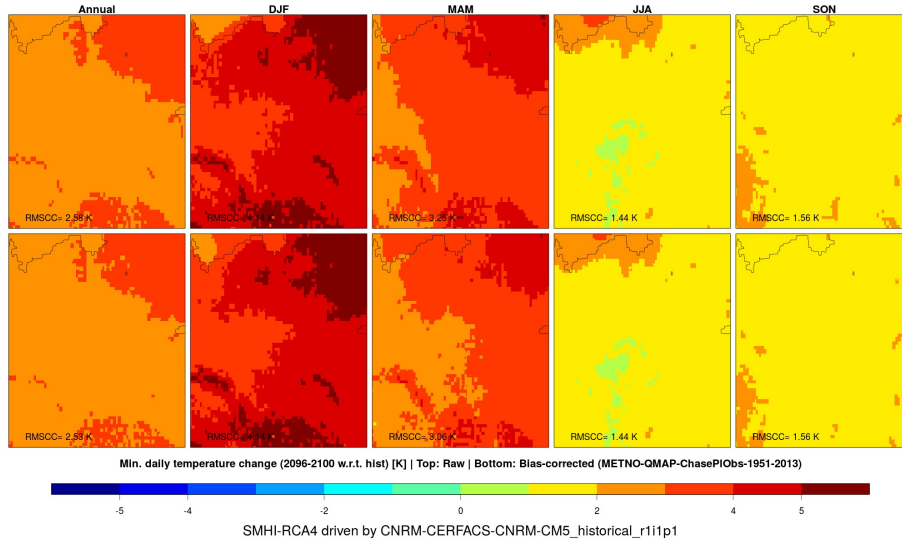

**SM 32.** Same caption as in SM 31 but for absolute changes in minimum temperature ( $^{\circ}\text{C}$ ).

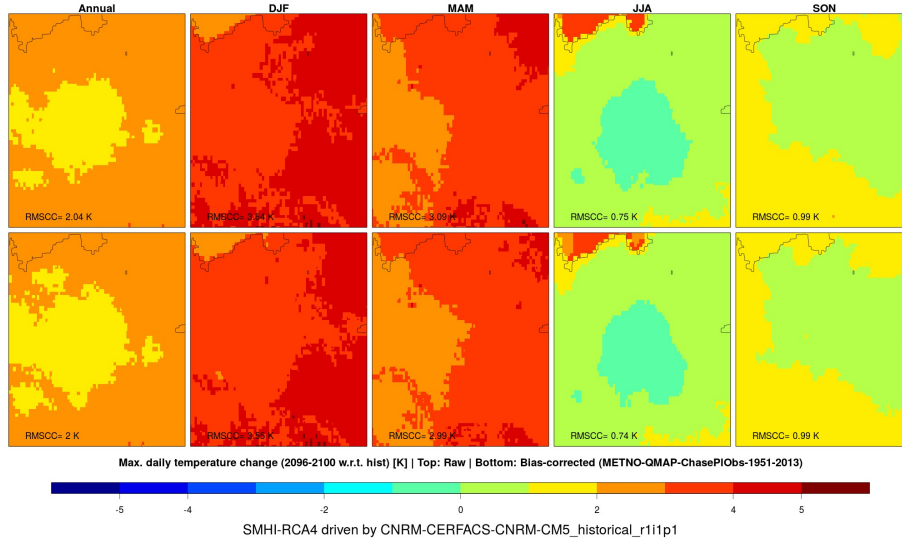

**SM 33.** Same caption as in SM 31 but for absolute changes in maximum temperature ( $^{\circ}\text{C}$ ).

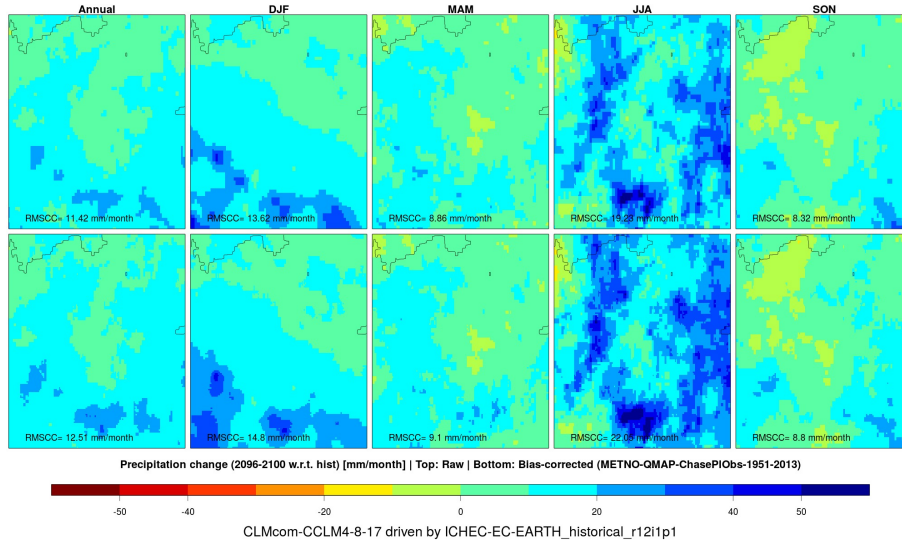

**SM 34.** Precipitation change signal (mm/month) for simulation 3. Absolute changes in future (2096–2100) with regards to historical simulations for both raw (top) and bias adjusted (bottom) data, respectively. The RMSCC indicates the root mean square values of the climate change estimated over the whole spatial domain.

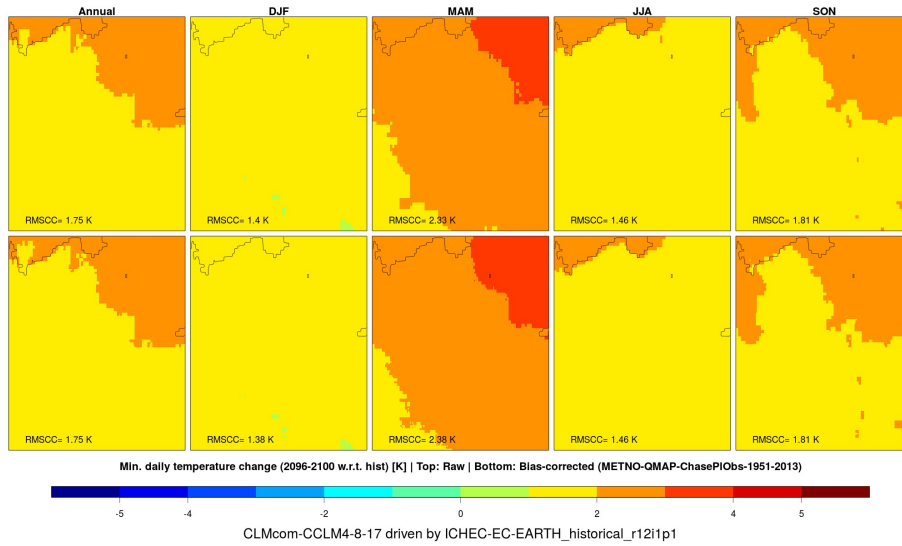

**SM 35.** Same caption as in SM 34 but for absolute changes in minimum temperature (°C).

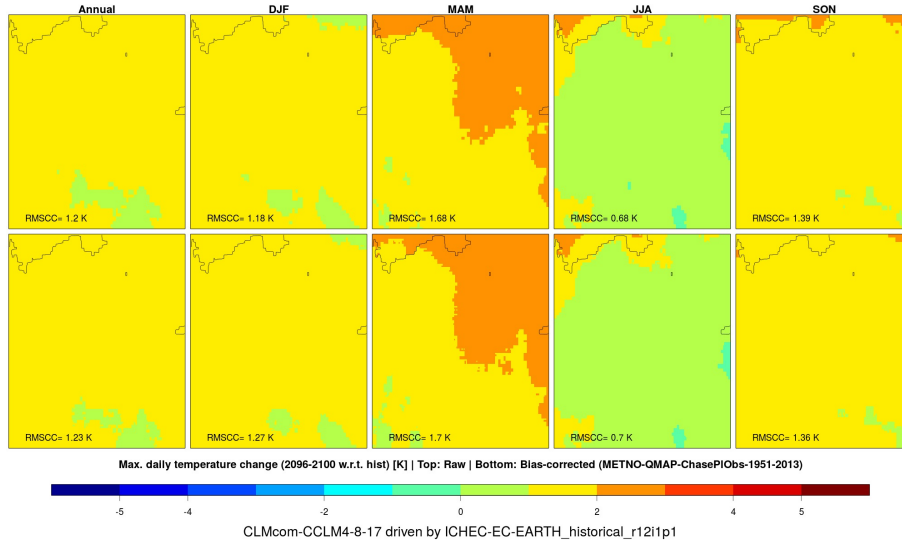

**SM 36.** Same caption as in SM 34 but for absolute changes in maximum temperature ( $^{\circ}\text{C}$ ).

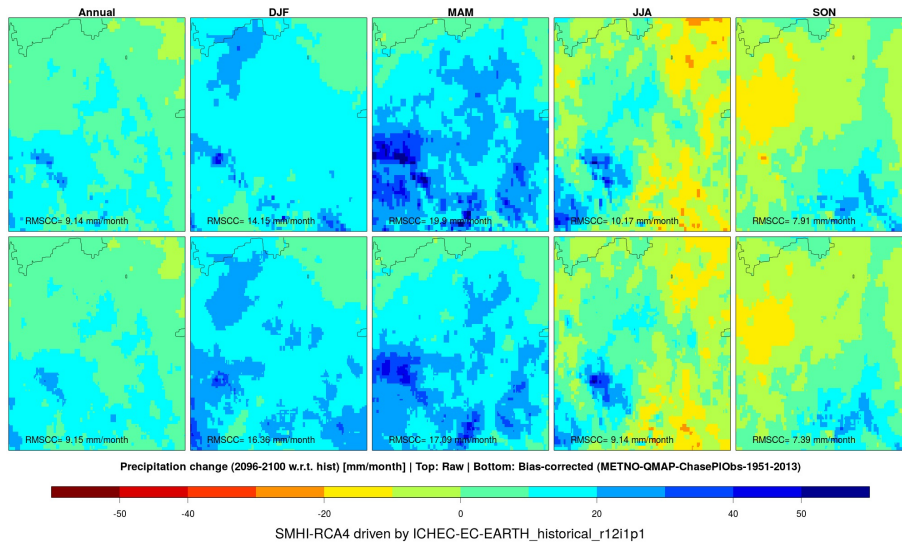

**SM 37.** Precipitation change signal (mm/month) for simulation 4. Absolute changes in future (2096–2100) with regards to historical simulations for both raw (top) and bias adjusted (bottom) data, respectively. The RMSCC indicates the root mean square values of the climate change estimated over the whole spatial domain.

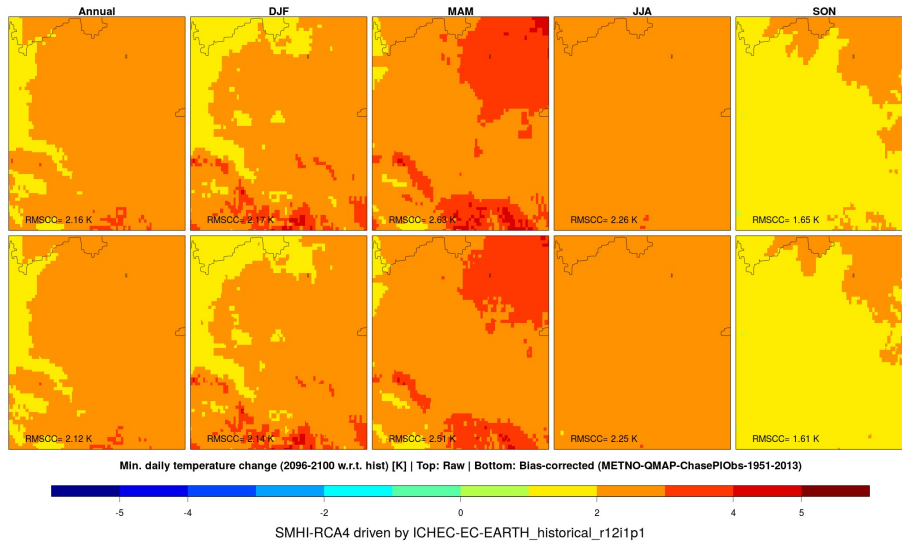

**SM 38.** Same caption as in SM 37 but for absolute changes in minimum temperature ( $^{\circ}\text{C}$ ).

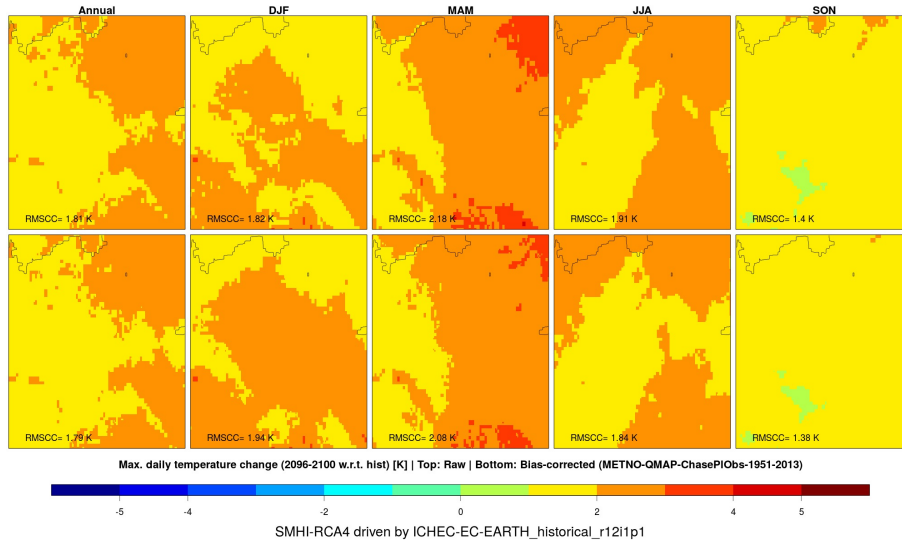

**SM 39.** Same caption as in SM 37 but for absolute changes in maximum temperature ( $^{\circ}\text{C}$ ).

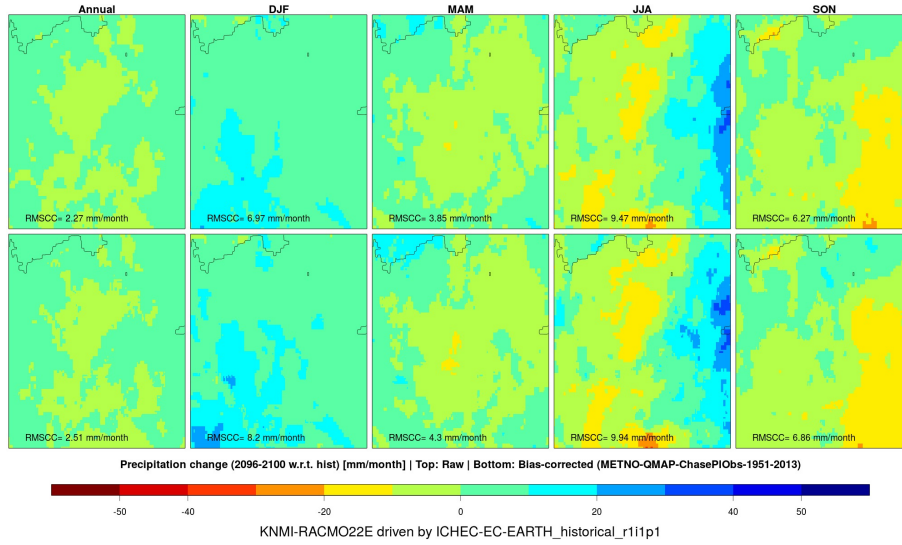

**SM 40.** Precipitation change signal (mm/month) for simulation 5. Absolute changes in future (2096–2100) with regards to historical simulations for both raw (top) and bias adjusted (bottom) data, respectively. The RMSCC indicates the root mean square values of the climate change estimated over the whole spatial domain.

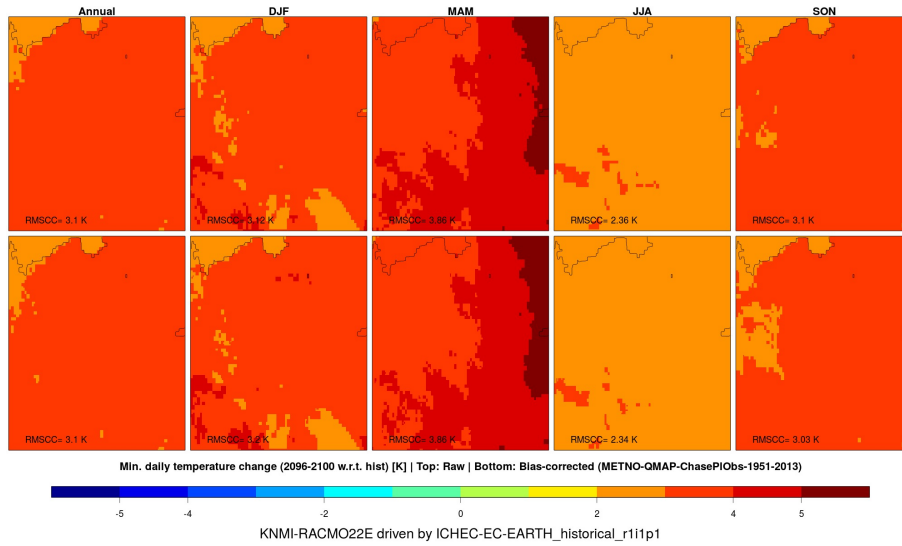

**SM 41.** Same caption as in SM 40 but for absolute changes in minimum temperature ( $^{\circ}\text{C}$ ).

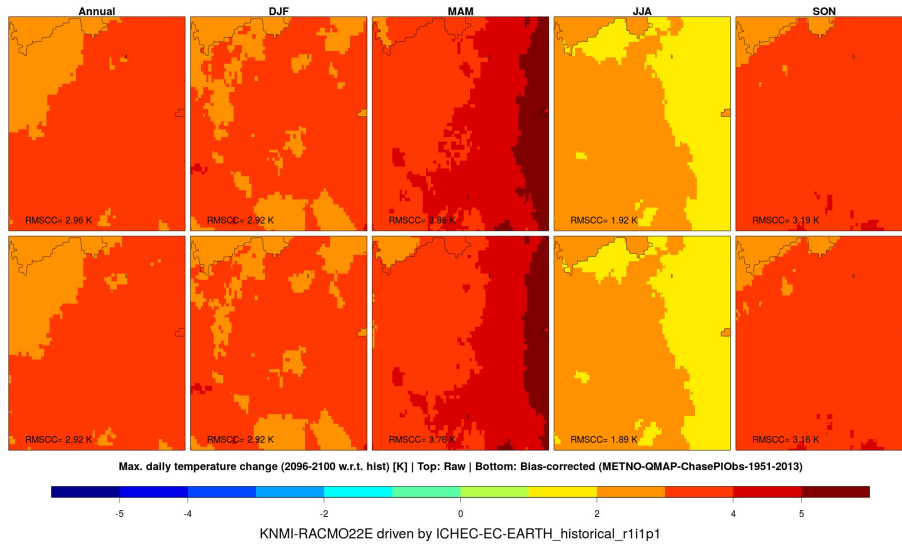

**SM 42.** Same caption as in SM 40 but for absolute changes in maximum temperature ( $^{\circ}\text{C}$ ).

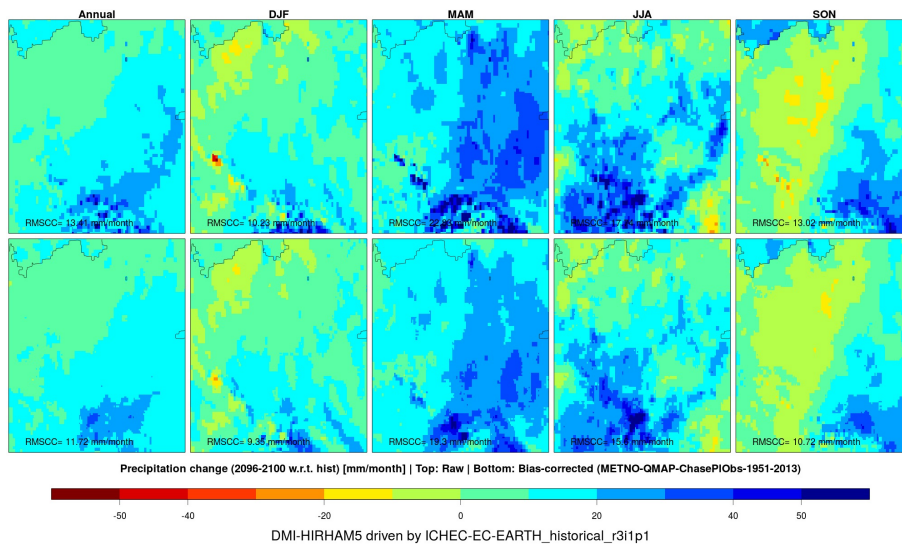

**SM 43.** Precipitation change signal (mm/month) for simulation 6. Absolute changes in future (2096–2100) with regards to historical simulations for both raw (top) and bias adjusted (bottom) data, respectively. The RMSCC indicates the root mean square values of the climate change estimated over the whole spatial domain.

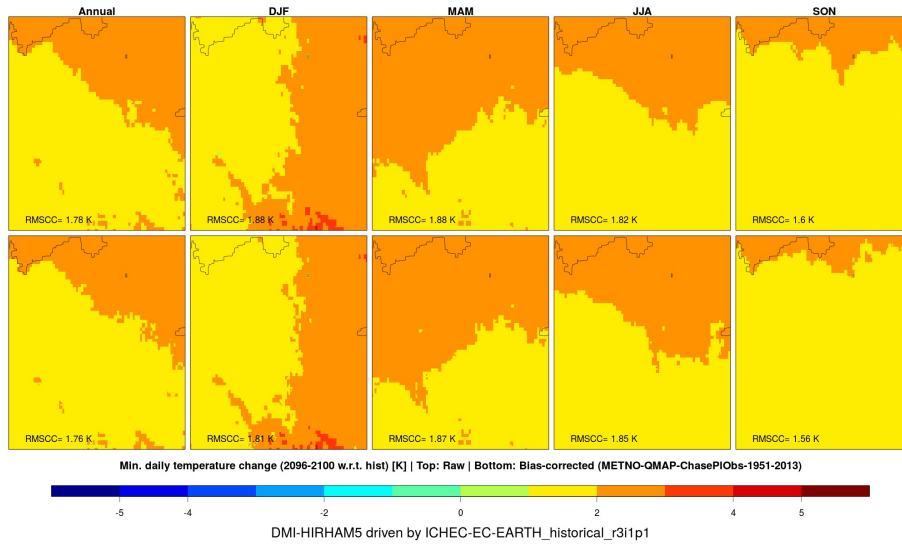

**SM 44.** Same caption as in SM 43 but for absolute changes in minimum temperature ( $^{\circ}\text{C}$ ).

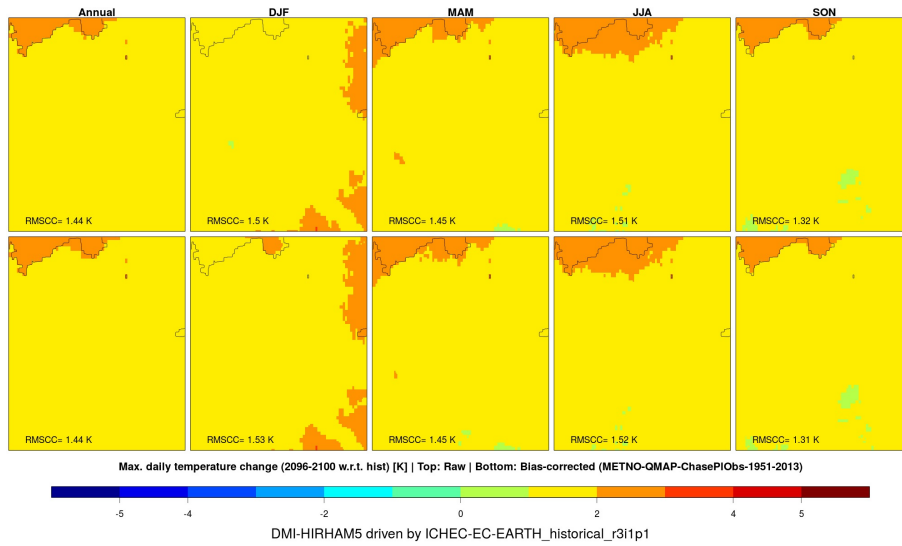

**SM 45.** Same caption as in SM 43 but for absolute changes in maximum temperature ( $^{\circ}\text{C}$ ).

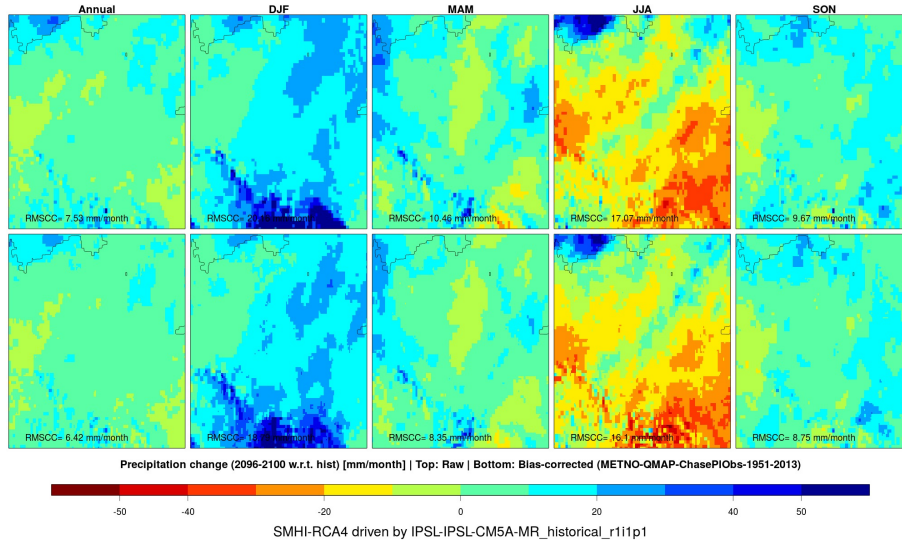

**SM 46.** Precipitation change signal (mm/month) for simulation 7. Absolute changes in future (2096–2100) with regards to historical simulations for both raw (top) and bias adjusted (bottom) data, respectively. The RMSCC indicates the root mean square values of the climate change estimated over the whole spatial domain.

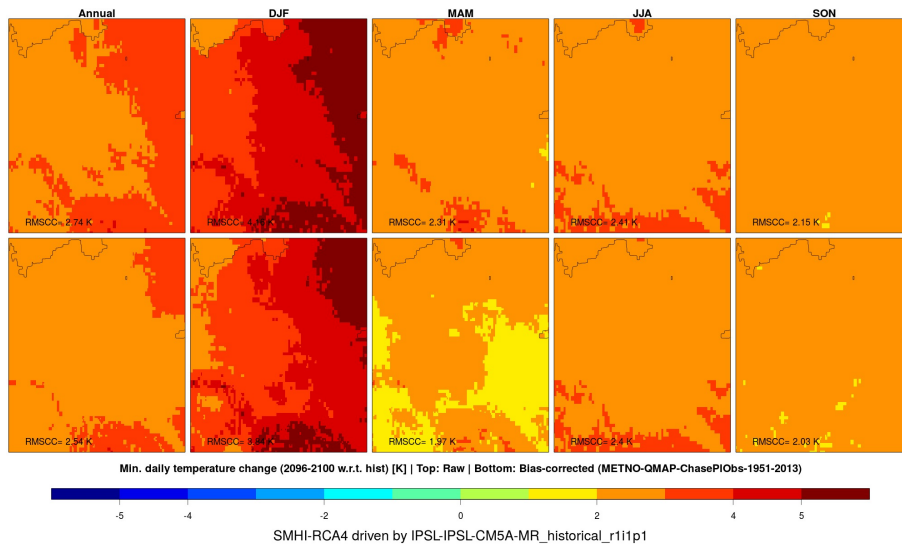

**SM 47.** Same caption as in SM 46 but for absolute changes in minimum temperature ( $^{\circ}\text{C}$ ).

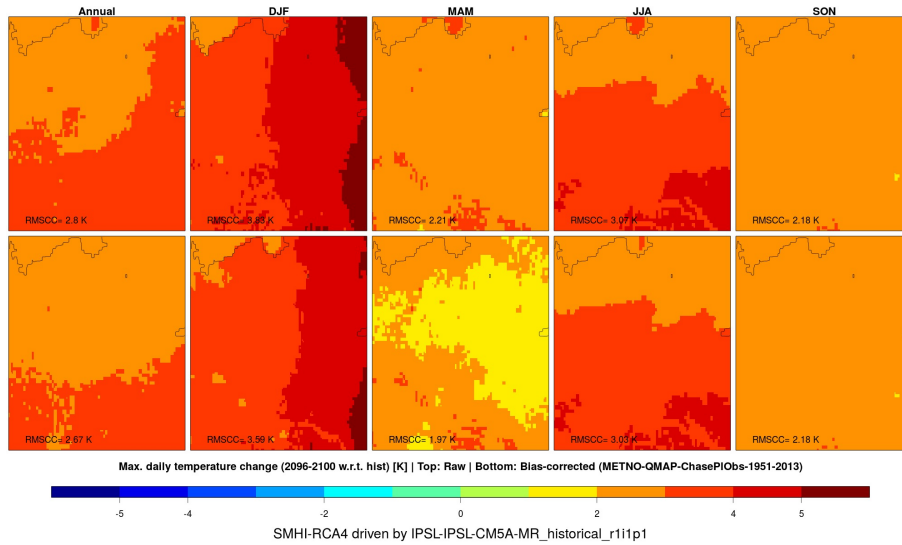

**SM 48.** Same caption as in SM 46 but for absolute changes in maximum temperature ( $^{\circ}\text{C}$ ).

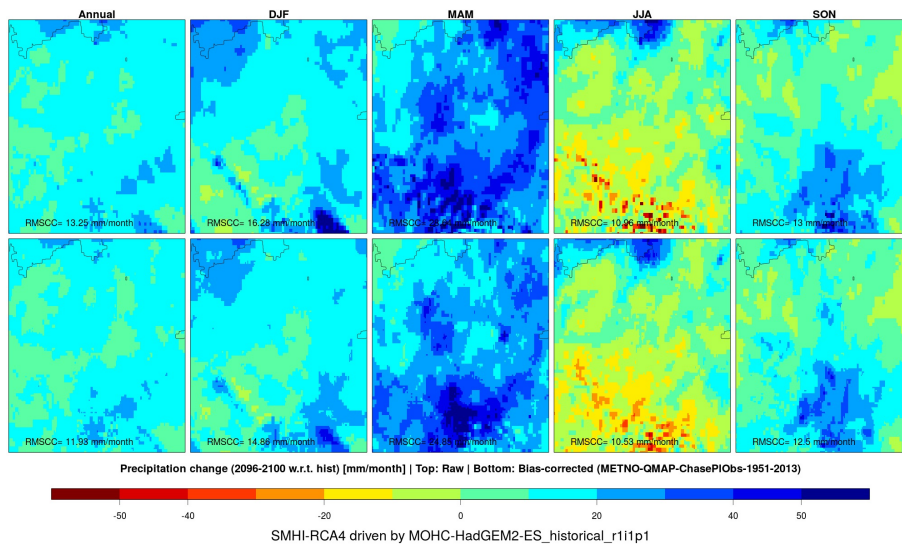

**SM 49.** Precipitation change signal (mm/month) for simulation 8. Absolute changes in future (2096–2100) with regards to historical simulations for both raw (top) and bias adjusted (bottom) data, respectively. The RMSCC indicates the root mean square values of the climate change estimated over the whole spatial domain.

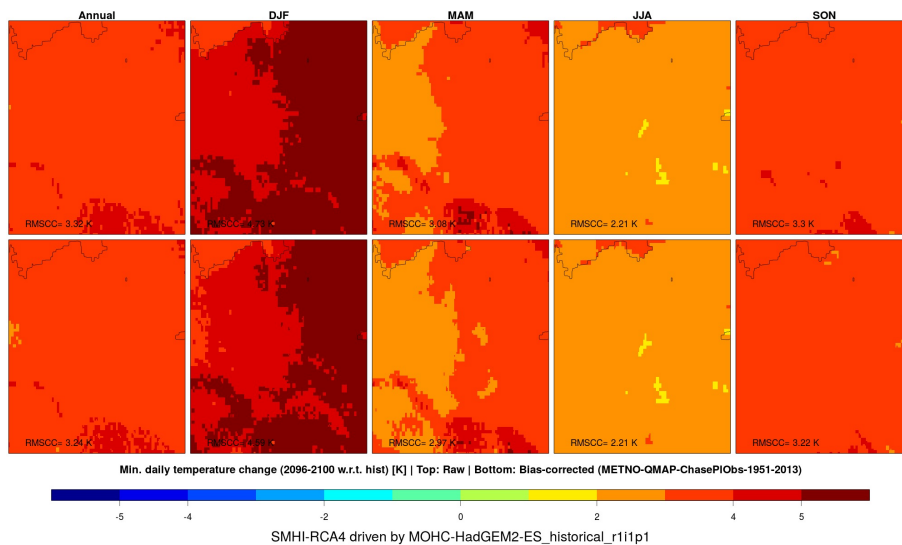

**SM 50.** Same caption as in SM 49 but for absolute changes in minimum temperature ( $^{\circ}\text{C}$ ).

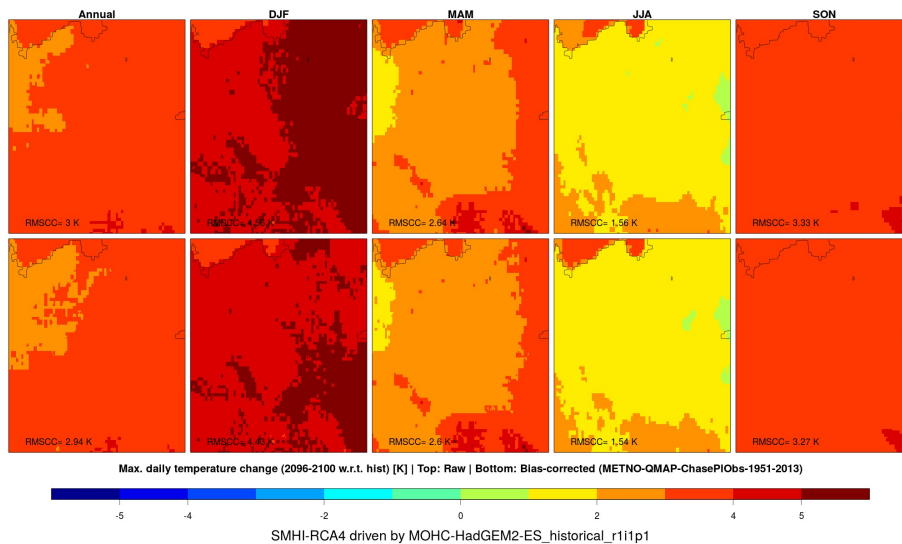

**SM 51.** Same caption as in SM 49 but for absolute changes in maximum temperature ( $^{\circ}\text{C}$ ).

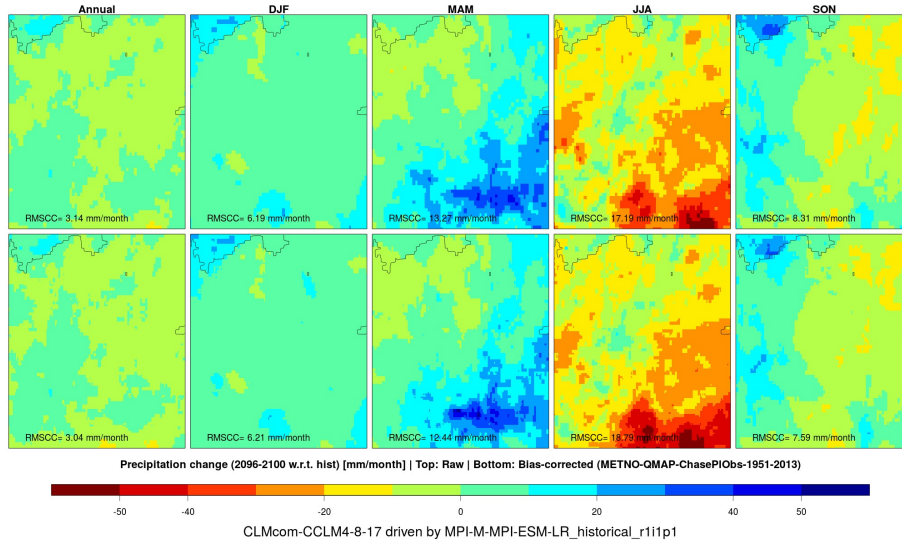

**SM 52.** Precipitation change signal (mm/month) for simulation 9. Absolute changes in future (2096–2100) with regards to historical simulations for both raw (top) and bias adjusted (bottom) data, respectively. The RMSCC indicates the root mean square values of the climate change estimated over the whole spatial domain.

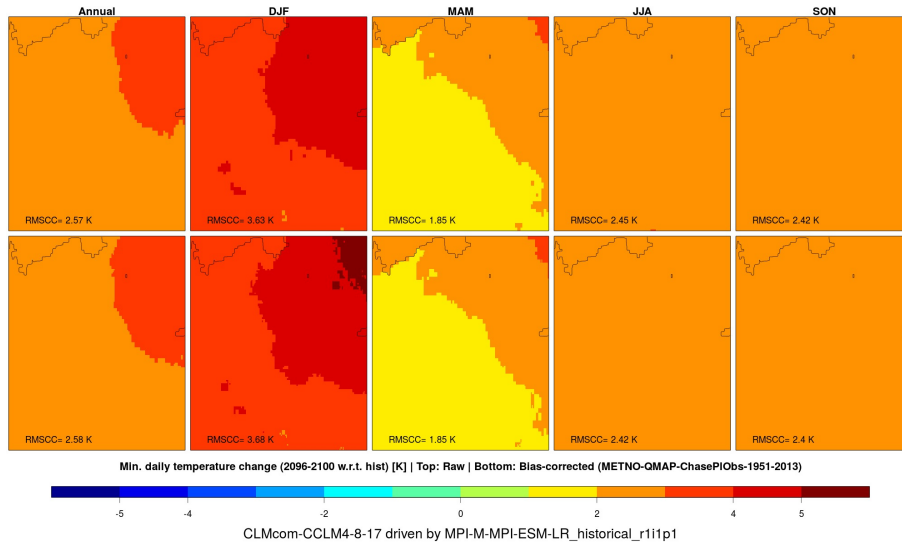

**SM 53.** Same caption as in SM 52 but for absolute changes in minimum temperature (°C).

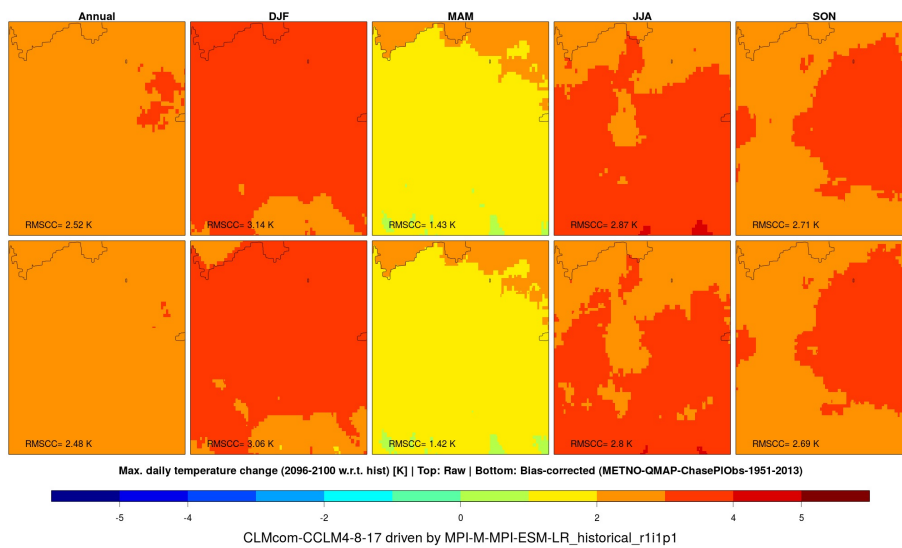

**SM 54.** Same caption as in SM 52 but for absolute changes in maximum temperature ( $^{\circ}\text{C}$ ).

## **4 Projected future climate changes in Poland**

### **4.1 Changes in the multi-model ensemble mean**

#### **4.1.1 Projected temperature**

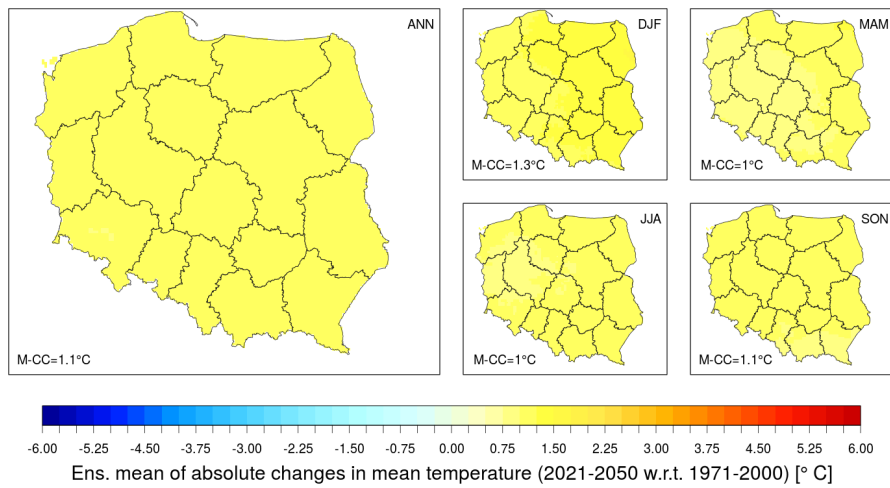

**SM 55.** Projected temperature changes (°C) for the near future (2021 - 2050) assuming the RCP4.5 scenario. Individual maps show the multi-model ensemble mean of absolute temperature deviations from the historical means (average over the period 1971-2000) based on annual (left large panel) and seasonal (right panels) mean projected temperature values. The legend 'M-CC' means the areal mean change estimated from the gridded data.

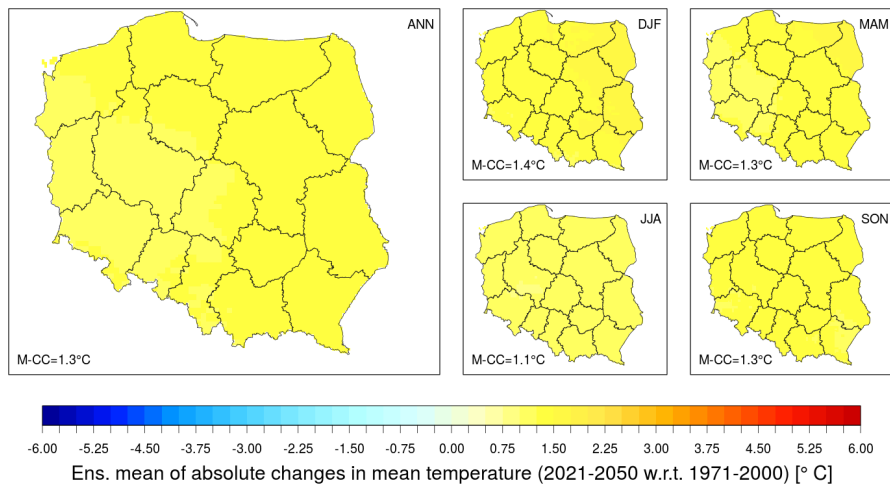

**SM 56.** Projected temperature changes (°C) for the near future (2021 - 2050) assuming the RCP8.5 scenario. Individual maps show the multi-model ensemble mean of absolute temperature deviations from the historical means (average over the period 1971-2000) based on annual (left large panel) and seasonal (right panels) mean projected temperature values. The legend 'M-CC' means the areal mean change estimated from the gridded data.

#### **4.1.2 Projected precipitation changes**

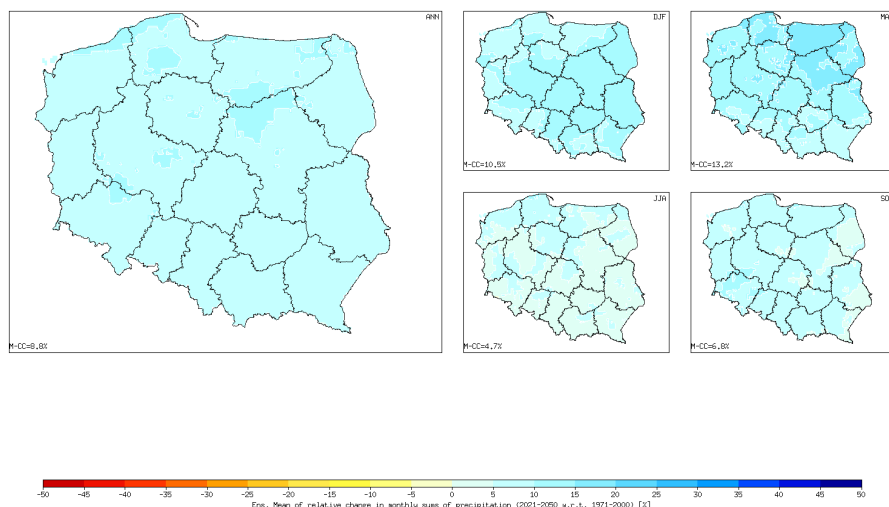

**SM 57.** Projected changes in monthly sums of precipitation (%) for the period (2021–2050) assuming the RCP8.5 scenario. Maps show annual (left large panel) and seasonal (right small panels) changes in the multi-model ensemble mean of absolute temperature with regards to the control period (1971–2000). The legend 'M-CC' means the areal mean change estimated from the gridded data, but for projected precipitation changes (%) by 2021–2050 assuming the RCP4.5 scenario.

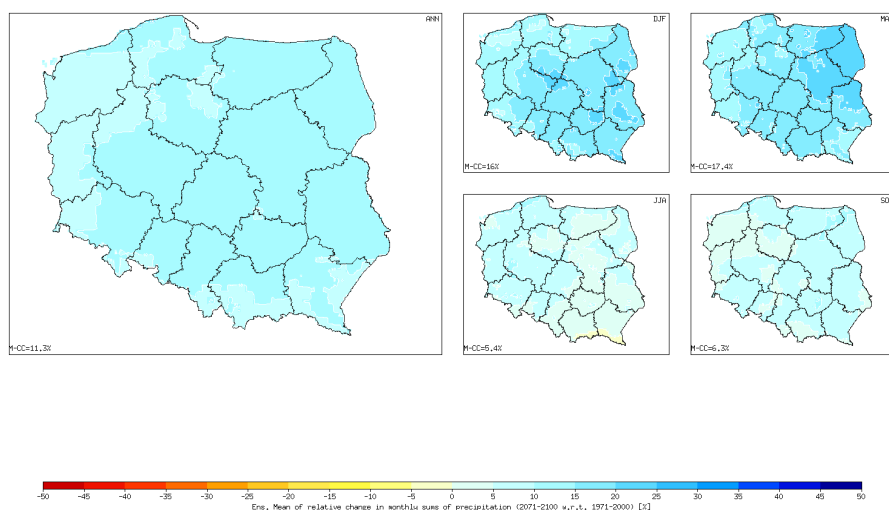

**SM 58.** Same as figure 56 but for projected precipitation changes (%) by 2071–2100 assuming the RCP4.5 scenario.

20 **5 Changes in individual model simulations**

**5.1 Projected precipitation**

**5.1.1 Changes in annual means**

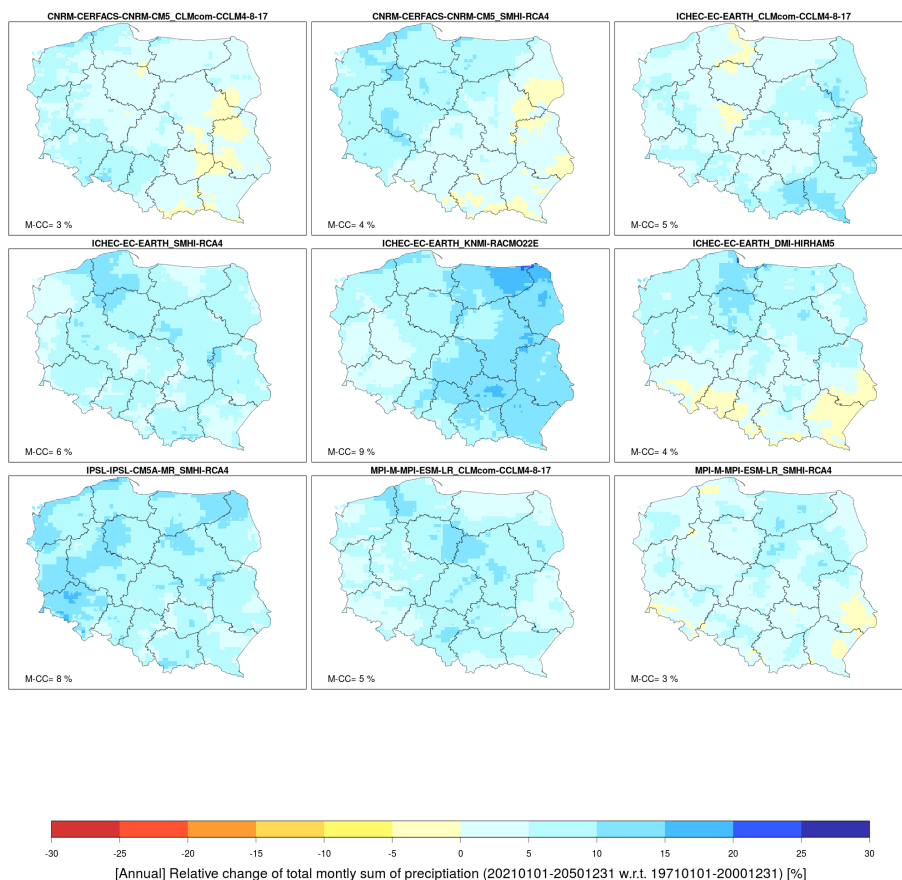

**SM 59.** Changes in projected annual means of monthly sums of precipitation by 2021–2050 assuming the RCP4.5 scenario. The maps show relative changes with regards to the historical period (1971–2000) for all nine adjusted simulations.

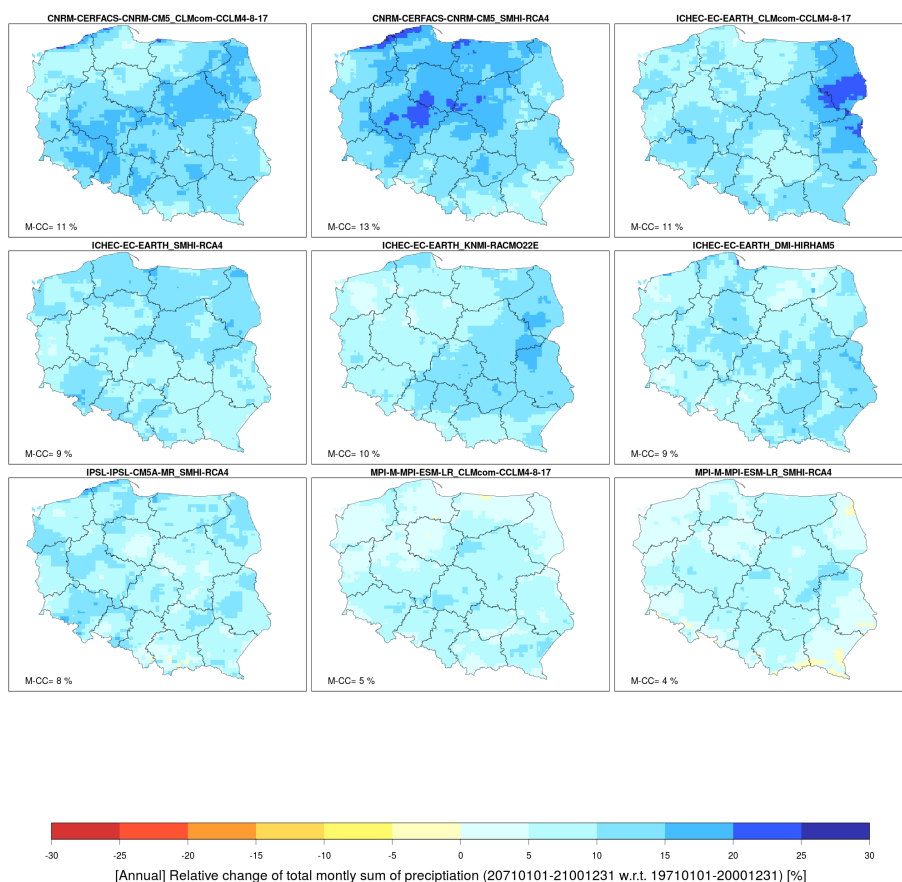

**SM 60.** Changes in projected annual means of monthly sums of precipitation by 2071–2100 assuming the RCP4.5 scenario. The maps show relative changes with regards to the historical period (1971–2000) for all nine adjusted simulations.

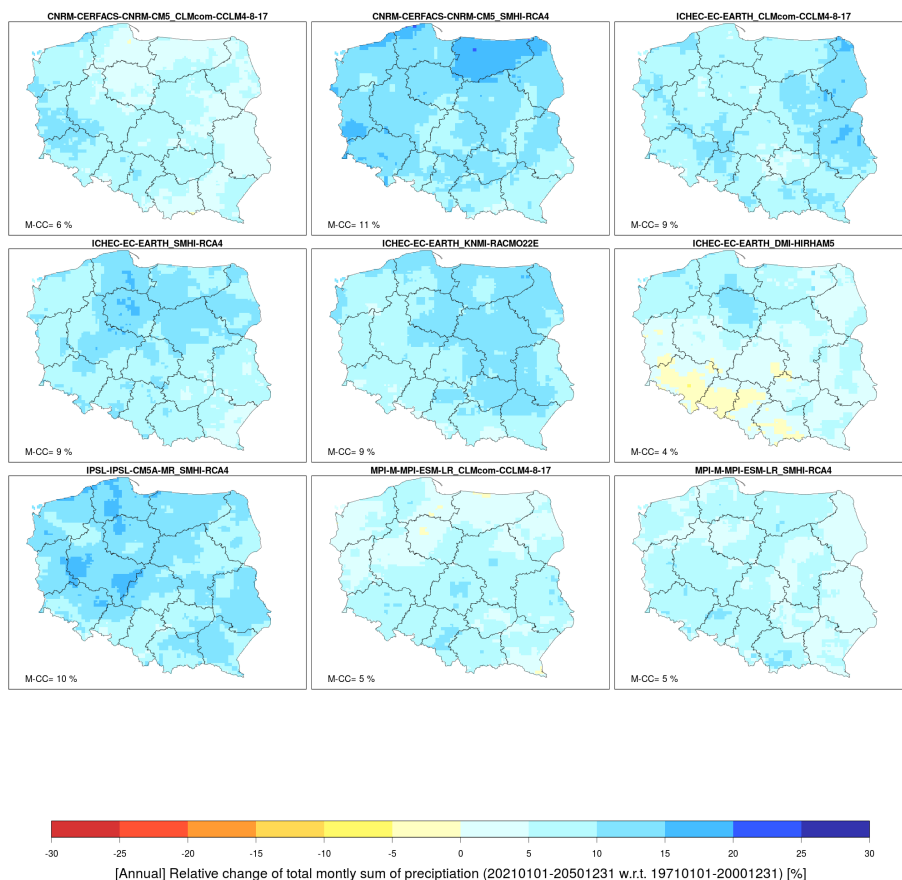

**SM 61.** Changes in projected annual means of monthly sums of precipitation by 2071–2100 assuming the RCP8.5 scenario. The maps show relative changes with regards to the historical period (1971–2000) for all nine adjusted simulations.

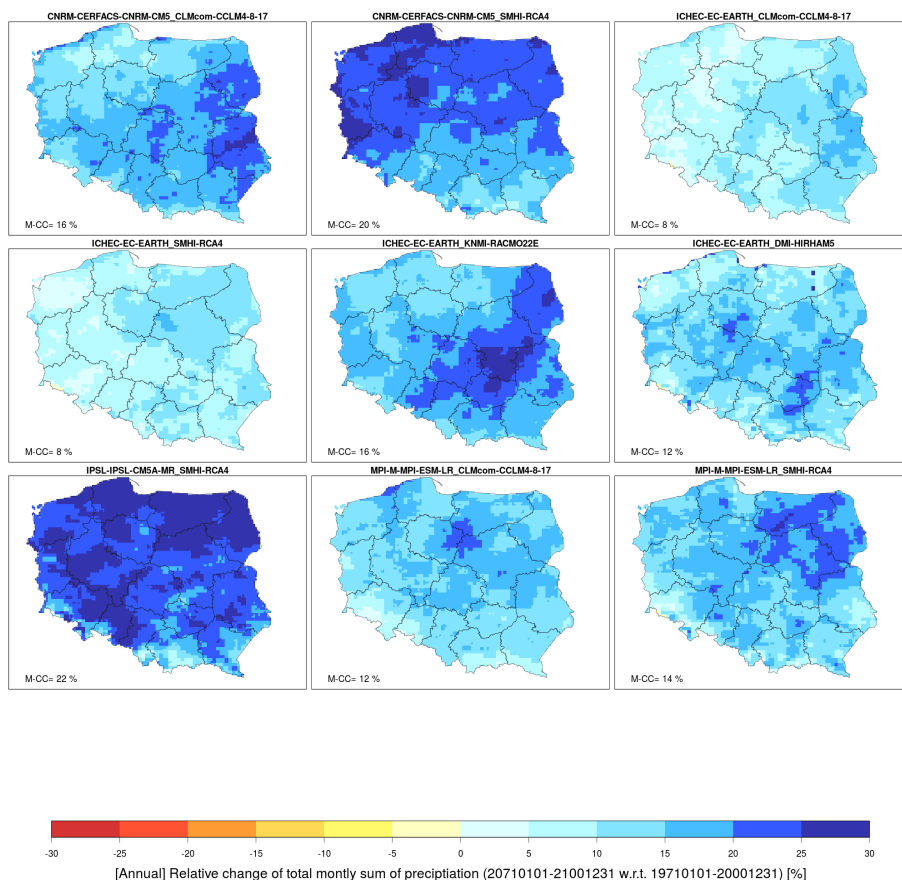

**SM 62.** Changes in projected annual means of monthly sums of precipitation by 2071–2100 assuming the RCP8.5 scenario. The maps show relative changes with regards to the historical period (1971–2000) for all nine adjusted simulations.

### **5.1.2 Changes in seasonal means**

### **5.1.3 Winter - DJF**

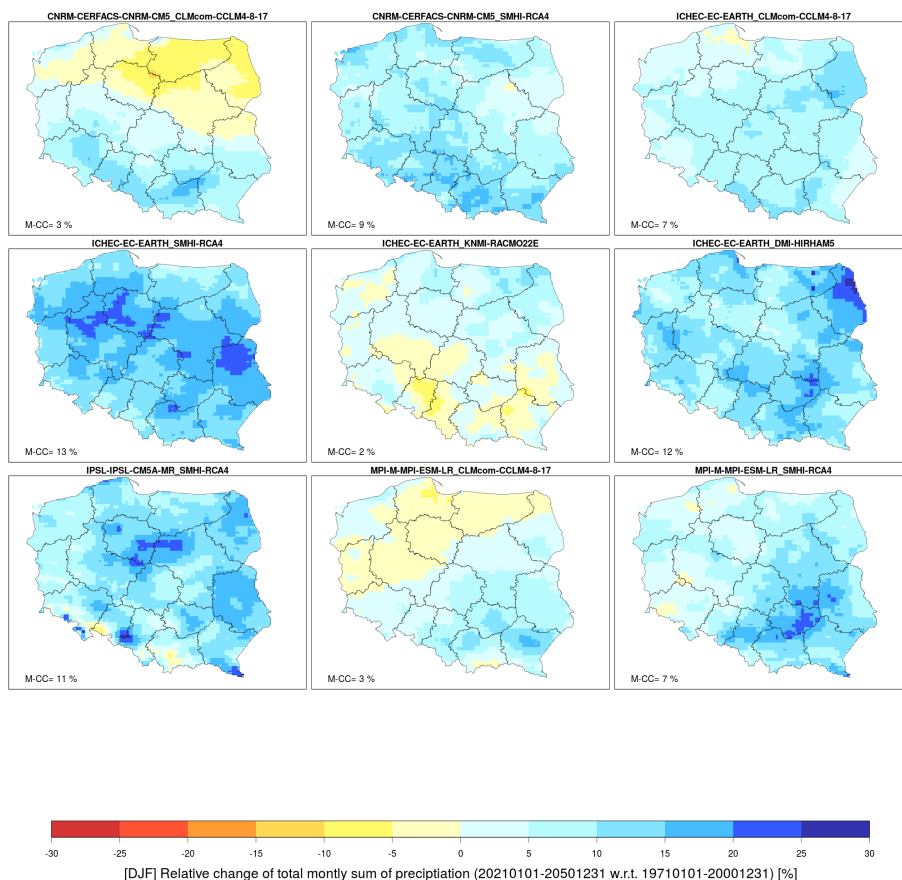

**SM 63.** Changes in projected winter means of monthly sums of precipitation by 2021–2050 assuming the RCP4.5 scenario. The maps show relative changes with regards to the historical period (1971–2000) for all nine adjusted simulations.

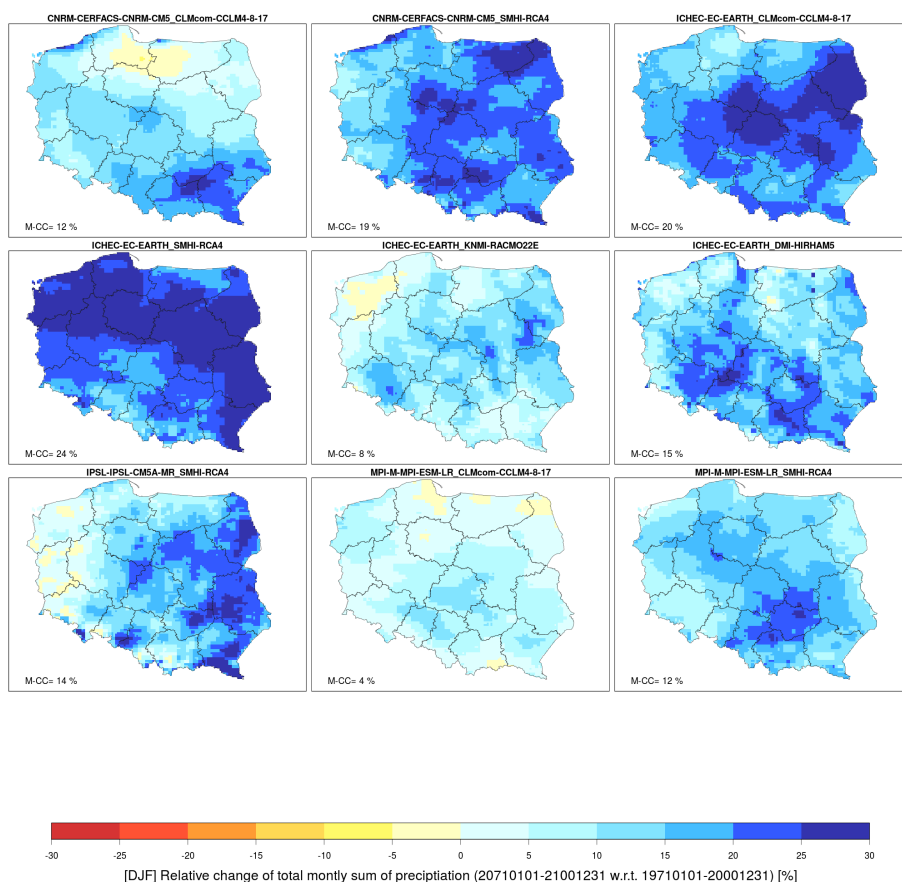

**SM 64.** Changes in projected winter means of monthly sums of precipitation by 2071–2100 assuming the RCP4.5 scenario. The maps show relative changes with regards to the historical period (1971–2000) for all nine adjusted simulations.

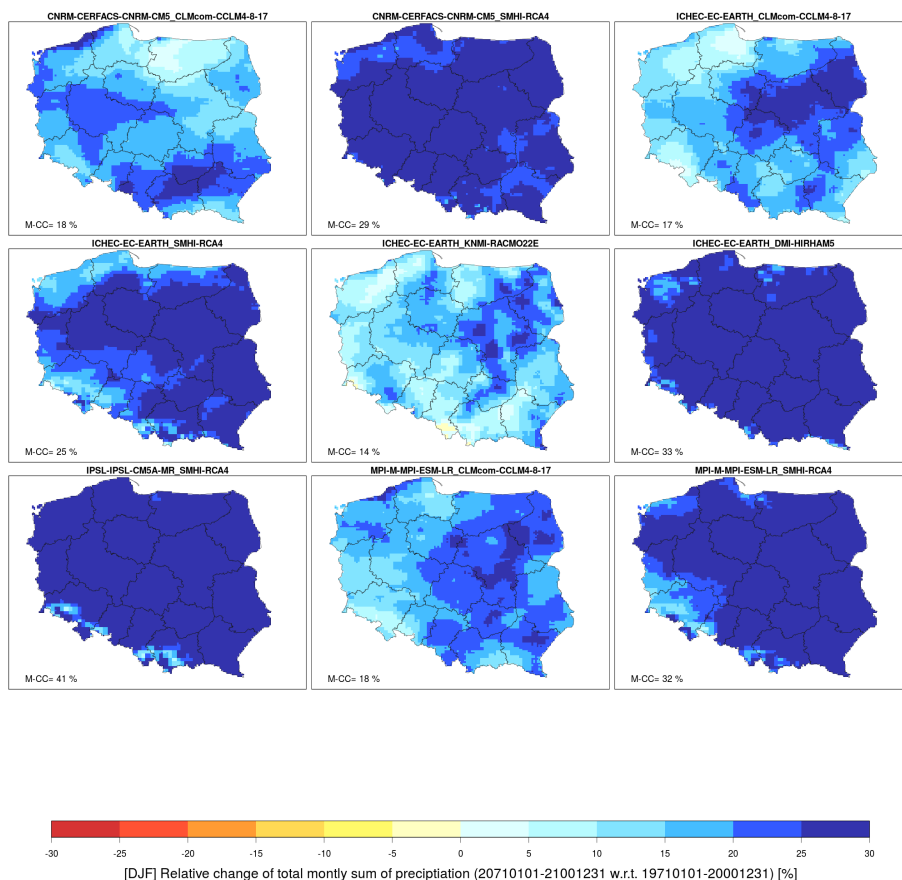

**SM 65.** Changes in projected winter means of monthly sums of precipitation by 2071–2100 assuming the RCP8.5 scenario. The maps show relative changes with regards to the historical period (1971–2000) for all nine adjusted simulations.

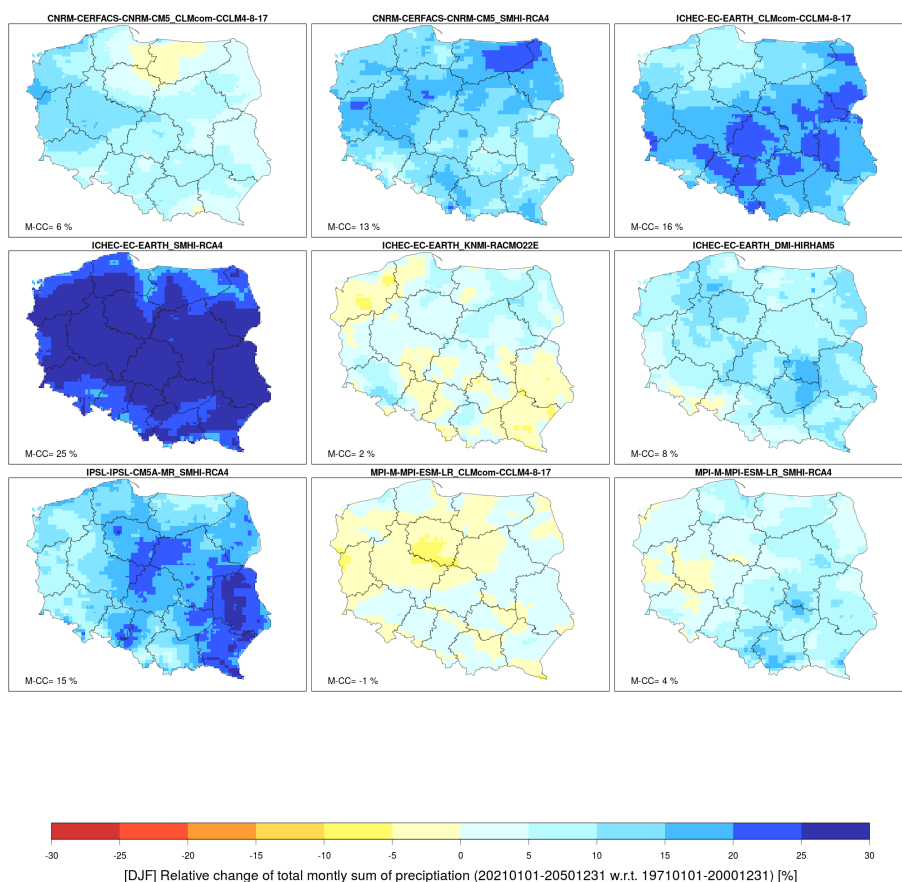

**SM 66.** Changes in projected winter means of monthly sums of precipitation by 2021–2050 assuming the RCP8.5 scenario. The maps show relative changes with regards to the historical period (1971–2000) for all nine adjusted simulations.



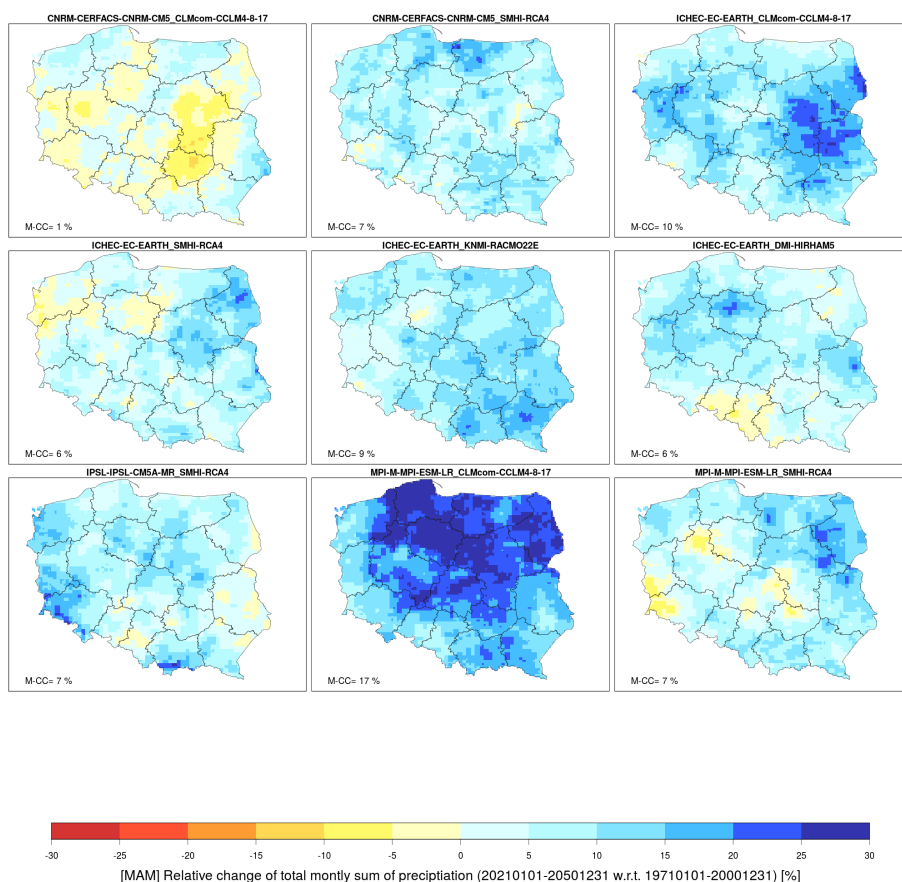

**SM 67.** Changes in projected spring means of monthly sums of precipitation by 2021–2050 assuming the RCP4.5 scenario. The maps show relative changes with regards to the historical period (1971–2000) for all nine adjusted simulations.

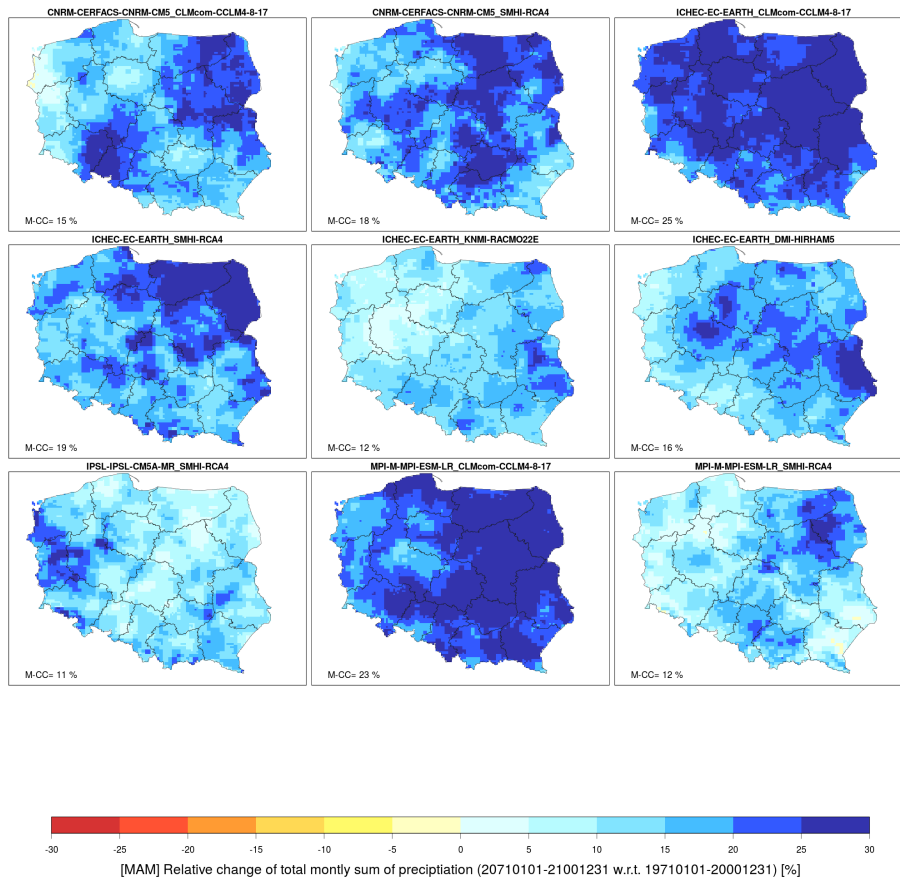

**SM 68.** Changes in projected spring means of monthly sums of precipitation by 2071–2100 assuming the RCP4.5 scenario. The maps show relative changes with regards to the historical period (1971–2000) for all nine adjusted simulations.

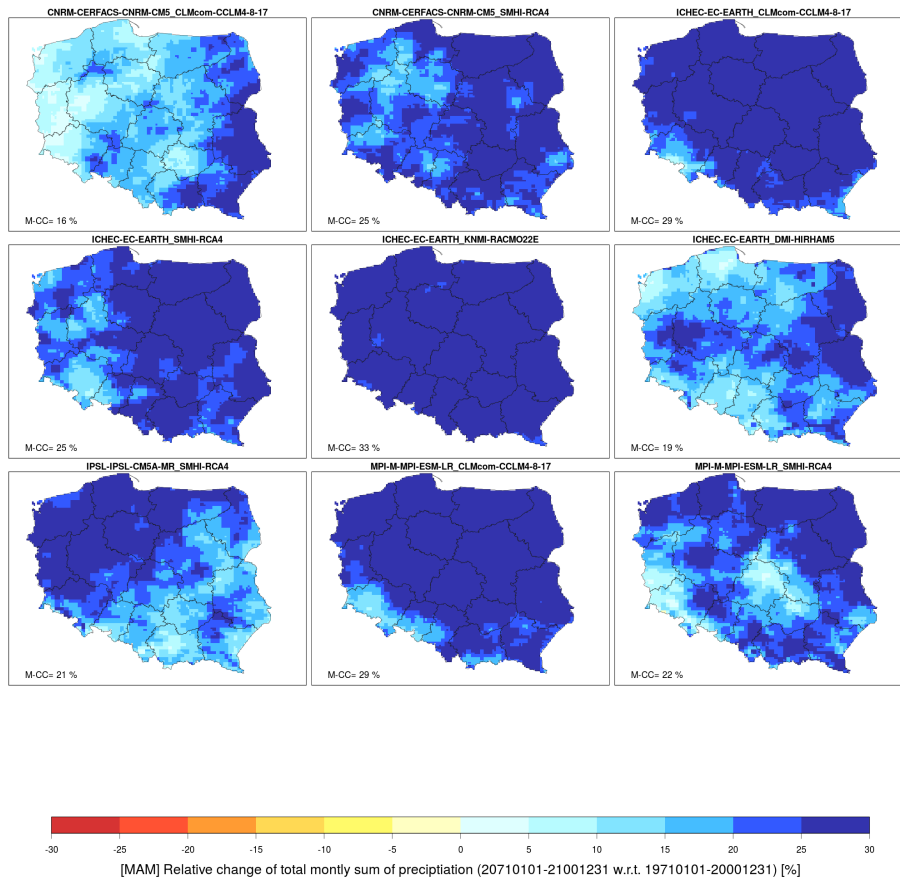

**SM 69.** Changes in projected spring means of monthly sums of precipitation by 2071–2100 assuming the RCP8.5 scenario. The maps show relative changes with regards to the historical period (1971–2000) for all nine adjusted simulations.

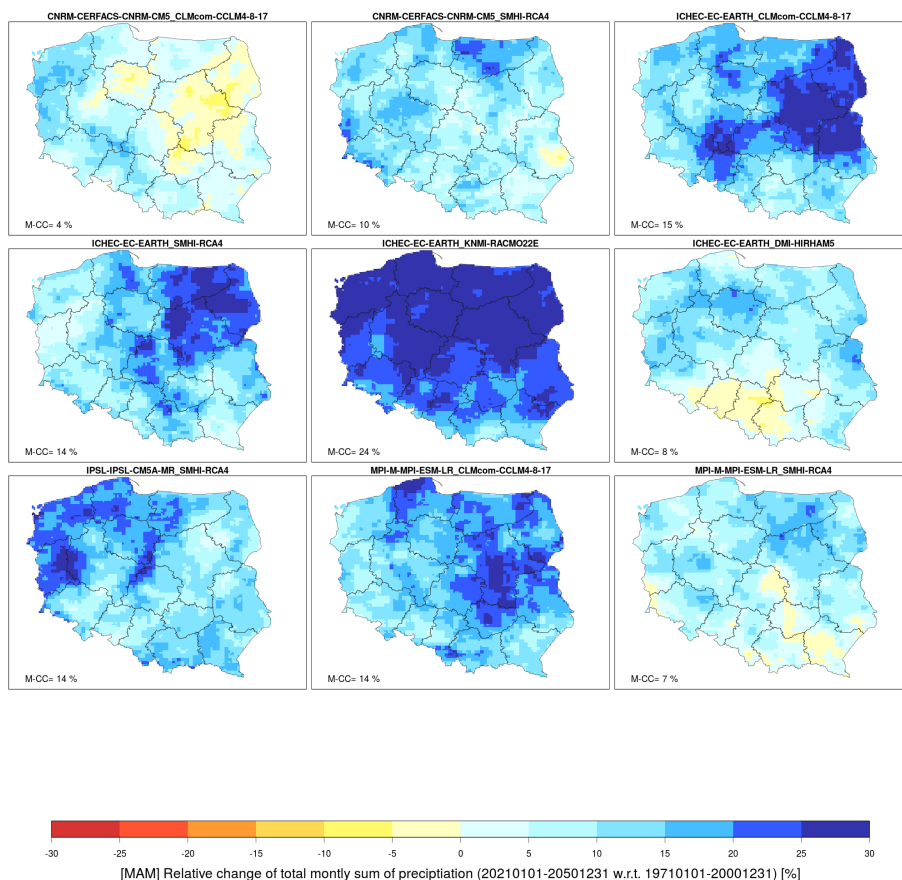

**SM 70.** Changes in projected spring means of monthly sums of precipitation by 2021–2050 assuming the RCP8.5 scenario. The maps show relative changes with regards to the historical period (1971–2000) for all nine adjusted simulations.

### **5.1.5 Summer - JJA**

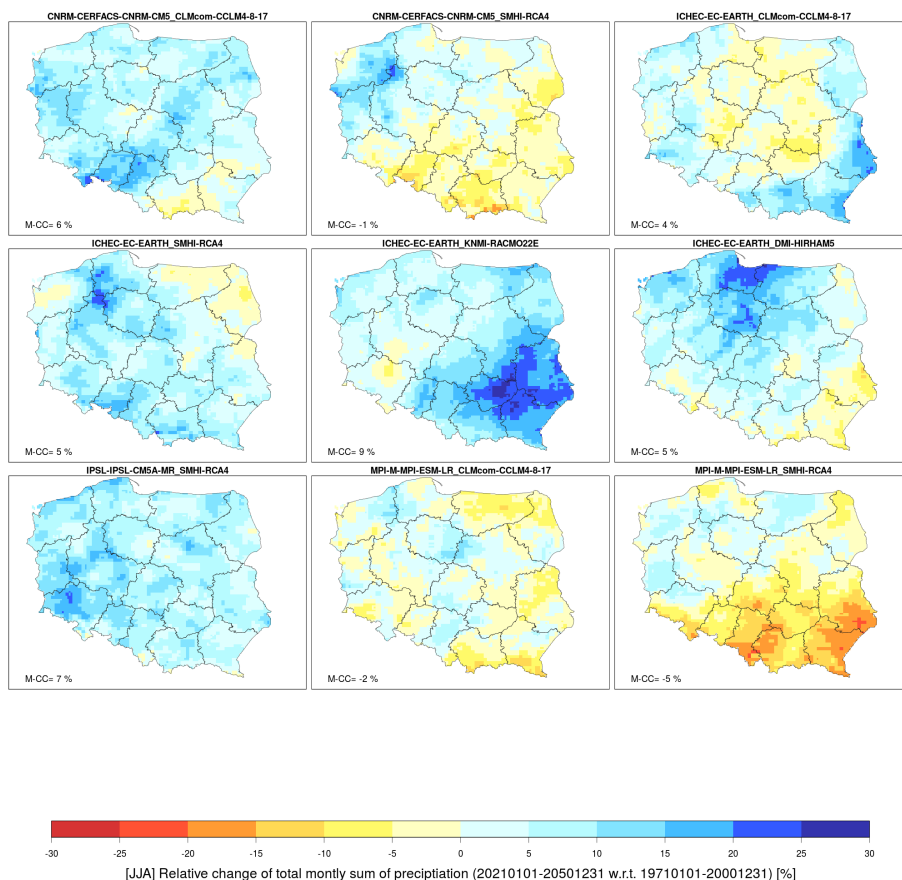

**SM 71.** Changes in projected summer means of monthly sums of precipitation by 2021–2050 assuming the RCP4.5 scenario. The maps show relative changes with regards to the historical period (1971–2000) for all nine adjusted simulations.

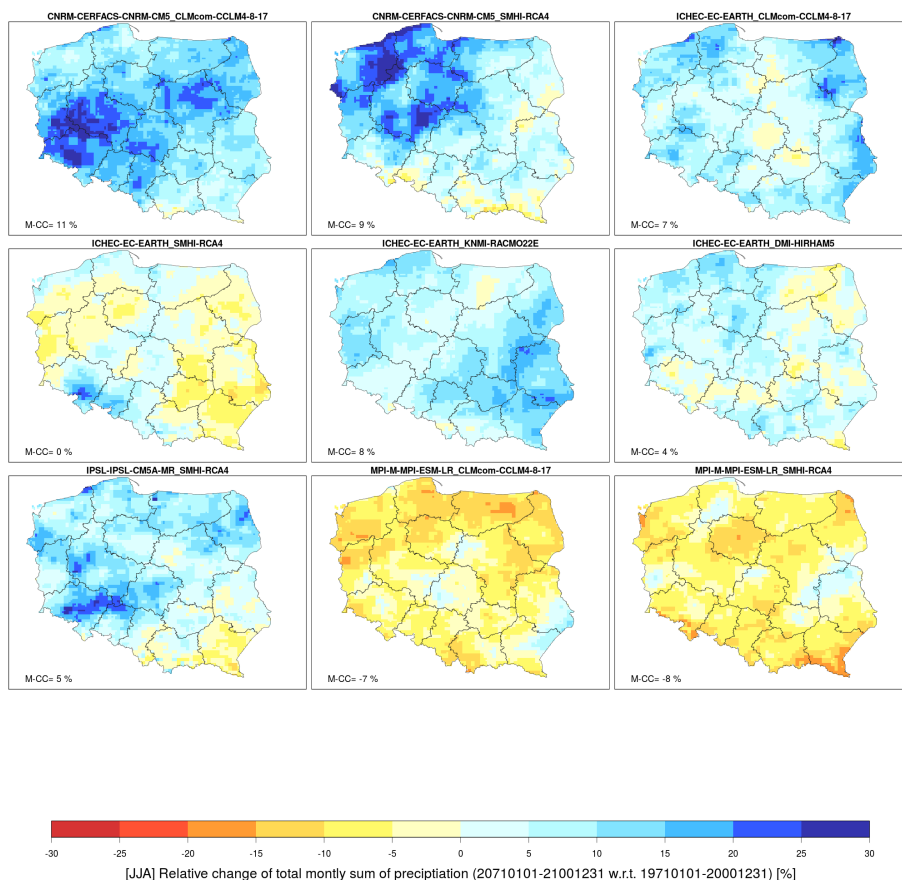

**SM 72.** Changes in projected summer means of monthly sums of precipitation by 2071–2100 assuming the RCP4.5 scenario. The maps show relative changes with regards to the historical period (1971–2000) for all nine adjusted simulations.

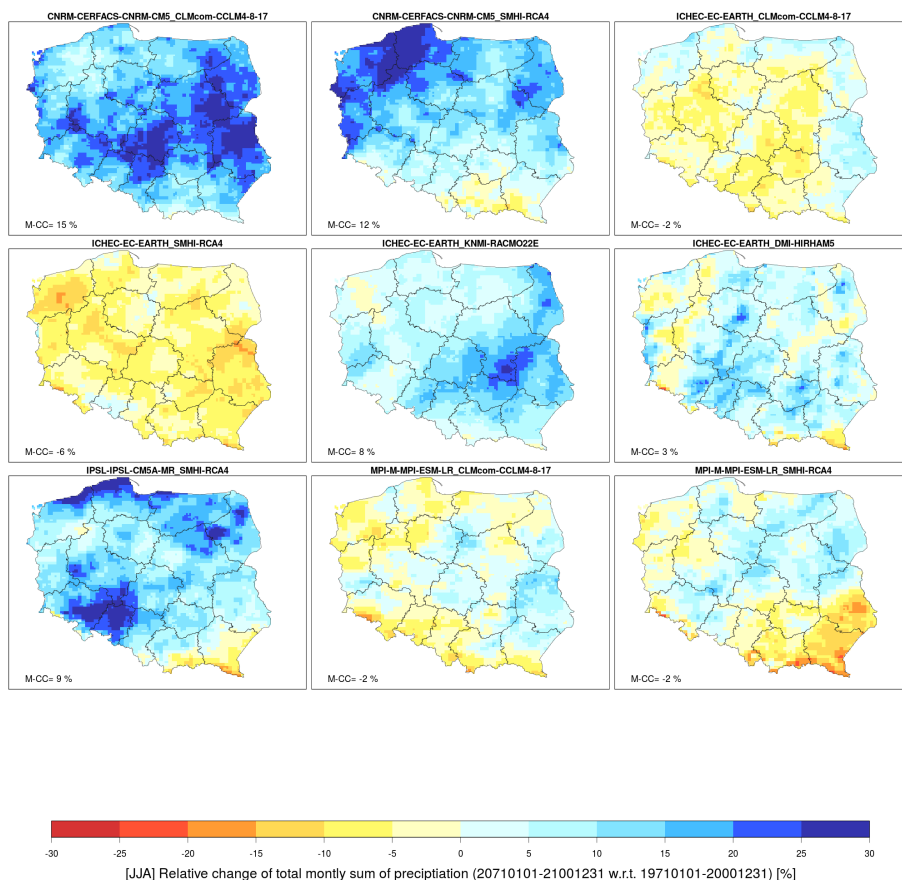

**SM 73.** Changes in projected summer means of monthly sums of precipitation by 2071–2100 assuming the RCP8.5 scenario. The maps show relative changes with regards to the historical period (1971–2000) for all nine adjusted simulations.

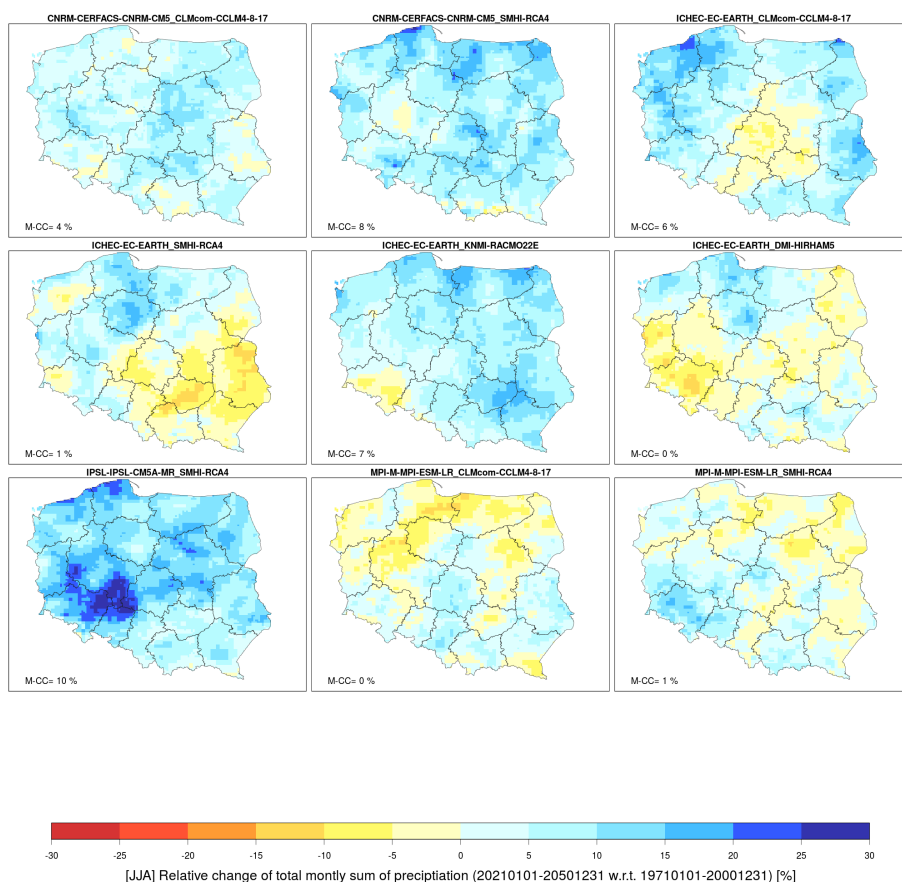

**SM 74.** Changes in projected summer means of monthly sums of precipitation by 2021–2050 assuming the RCP8.5 scenario. The maps show relative changes with regards to the historical period (1971–2000) for all nine adjusted simulations.

### **5.1.6 Autumn - SON**

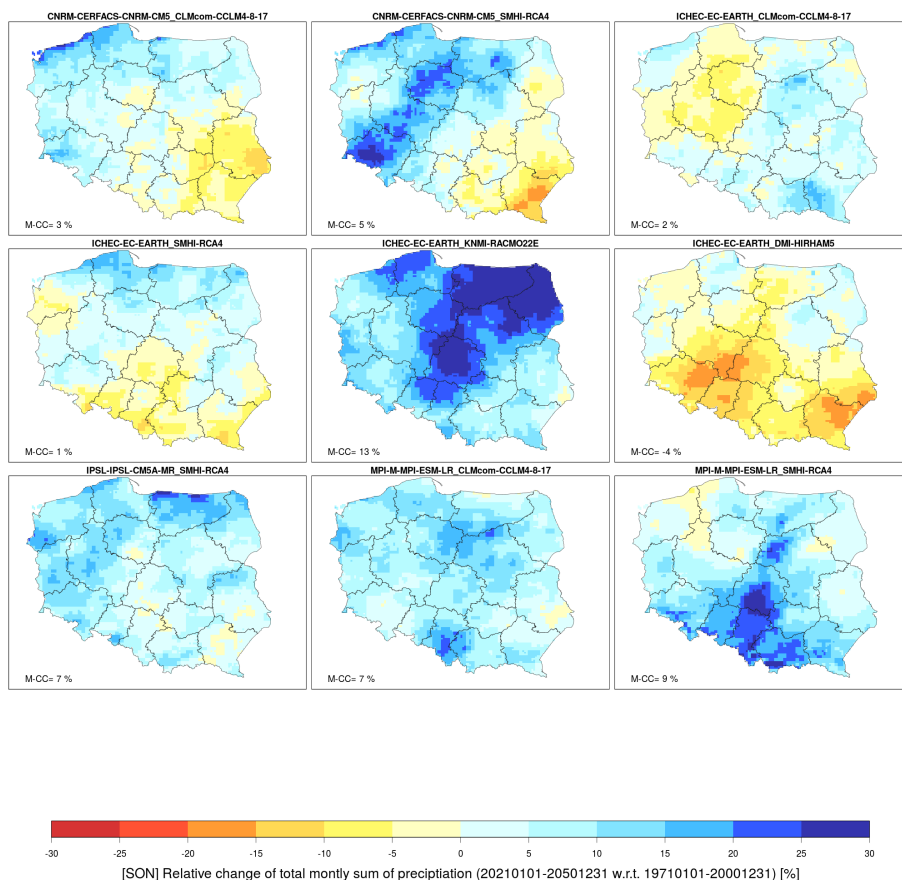

**SM 75.** Changes in projected autumn means of monthly sums of precipitation by 2021–2050 assuming the RCP4.5 scenario. The maps show relative changes with regards to the historical period (1971–2000) for all nine adjusted simulations.

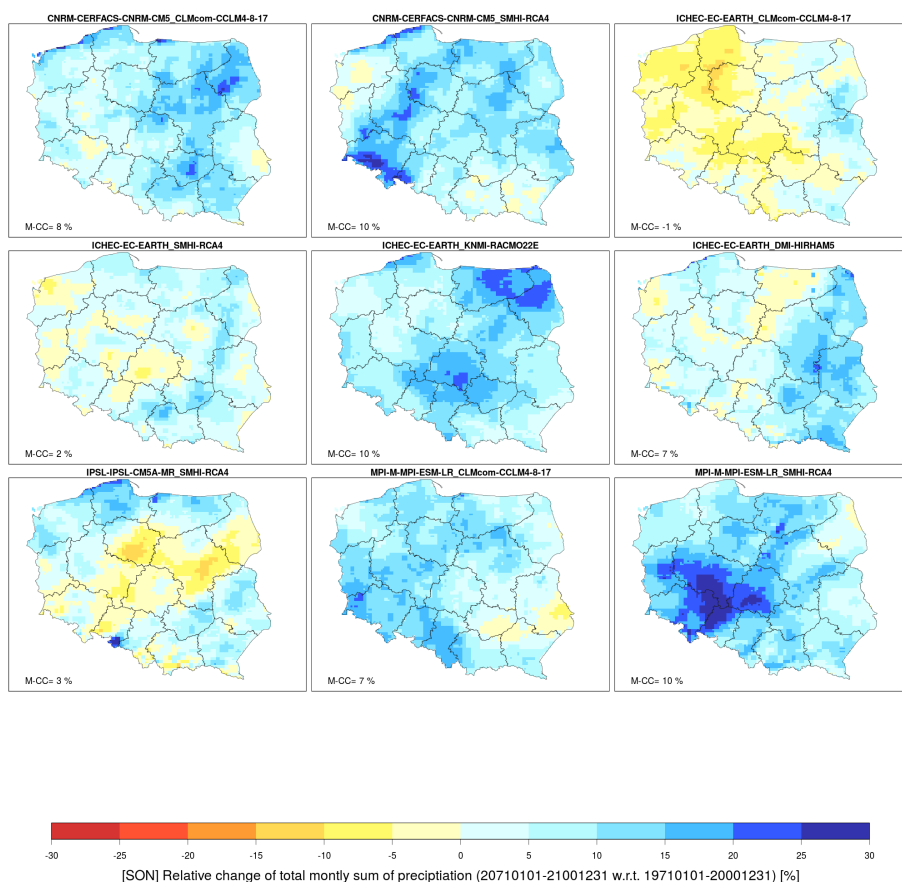

**SM 76.** Changes in projected autumn means of monthly sums of precipitation by 2071–2100 assuming the RCP4.5 scenario. The maps show relative changes with regards to the historical period (1971–2000) for all nine adjusted simulations.

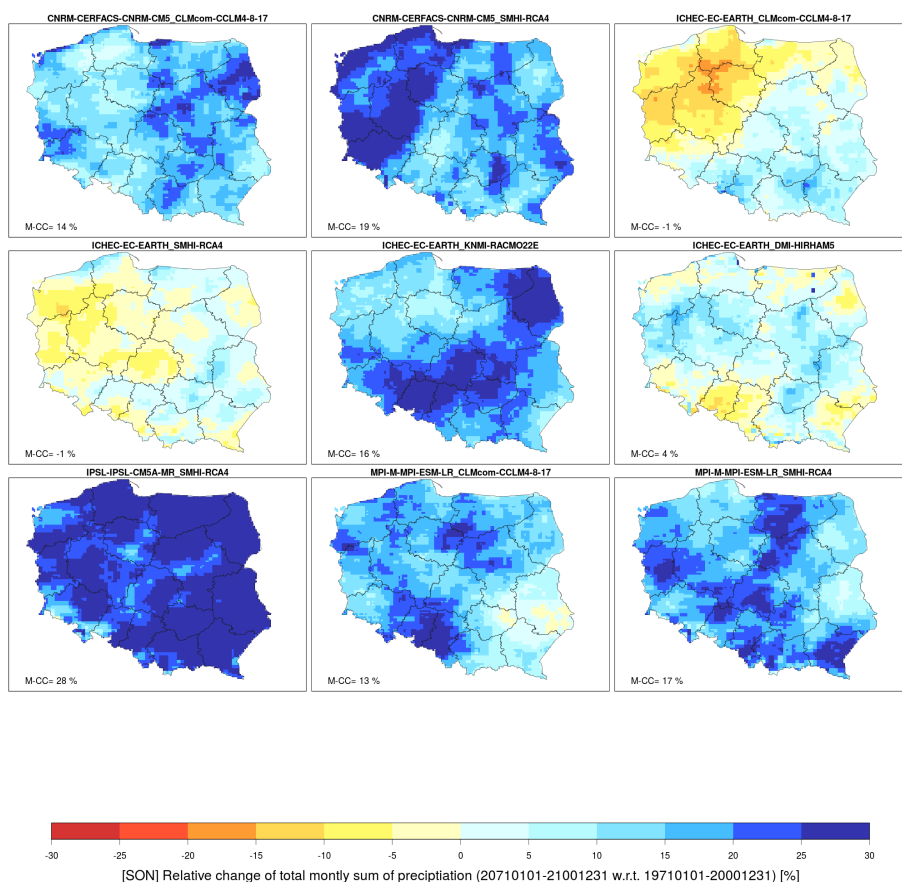

**SM 77.** Changes in projected autumn means of monthly sums of precipitation by 2071–2100 assuming the RCP8.5 scenario. The maps show relative changes with regards to the historical period (1971–2000) for all nine adjusted simulations.

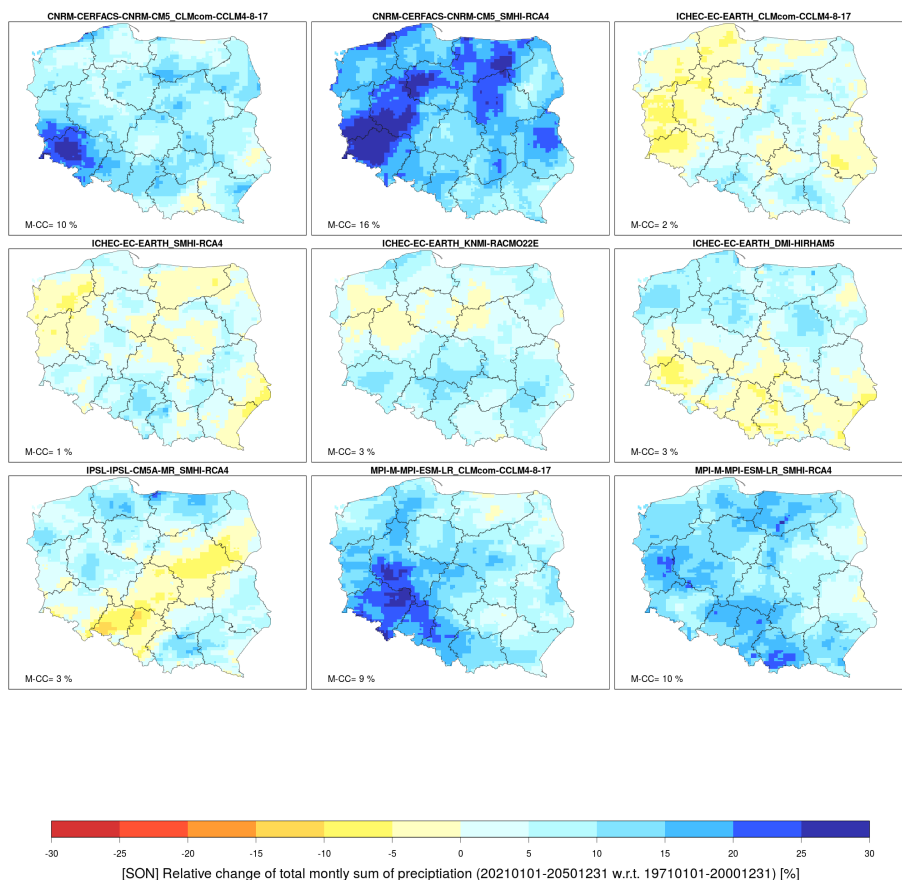

**SM 78.** Changes in projected autumn means of monthly sums of precipitation by 2021–2050 assuming the RCP8.5 scenario. The maps show relative changes with regards to the historical period (1971–2000) for all nine adjusted simulations.

## **5.2 Projected maximum temperature**

### **5.2.1 Changes in annual means**

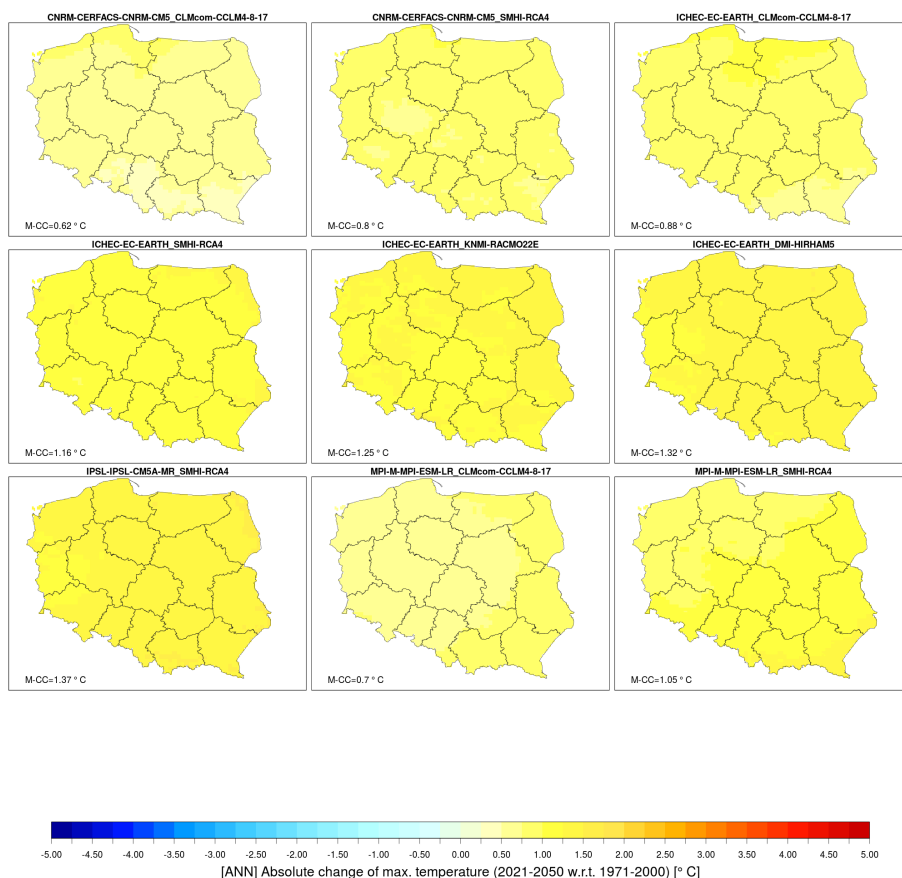

**SM 79.** Changes in projected annual means of daily maximum temperature by 2021–2050 assuming the RCP4.5 scenario. Absolute changes with regards to the historical period (1971–2000) for all nine adjusted simulations.

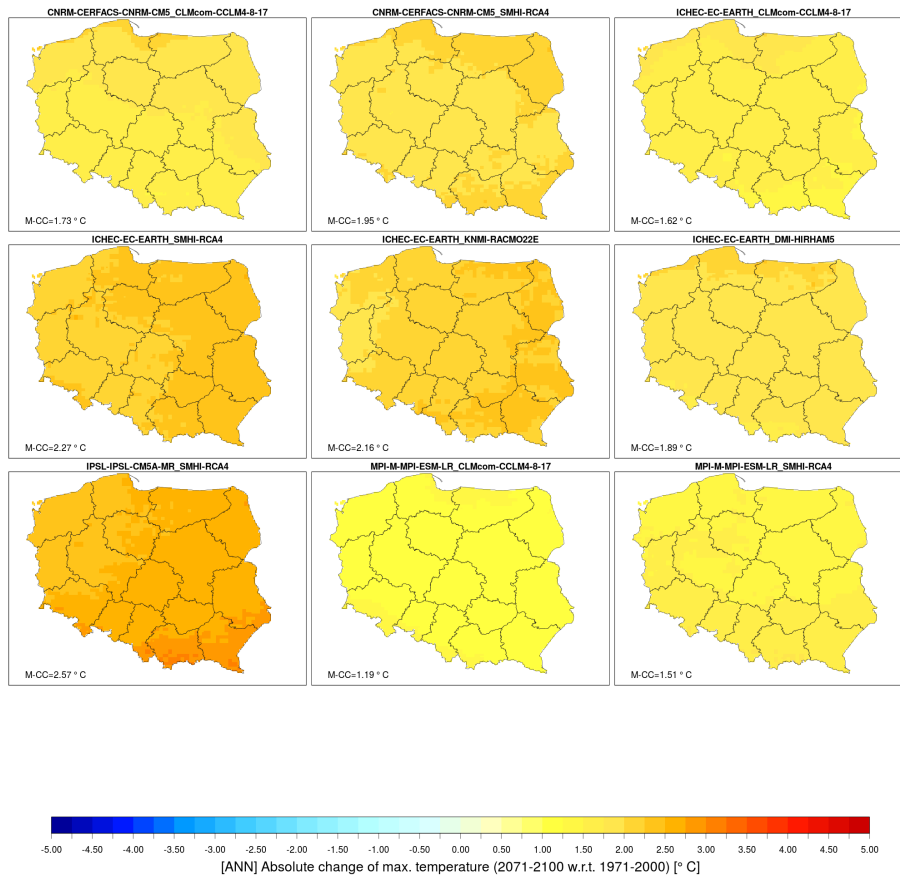

**SM 80.** Changes in projected annual means of daily maximum temperature by 2071–2100 assuming the RCP4.5 scenario. The maps show absolute changes with regards to the historical period (1971–2000) for all nine adjusted simulations.

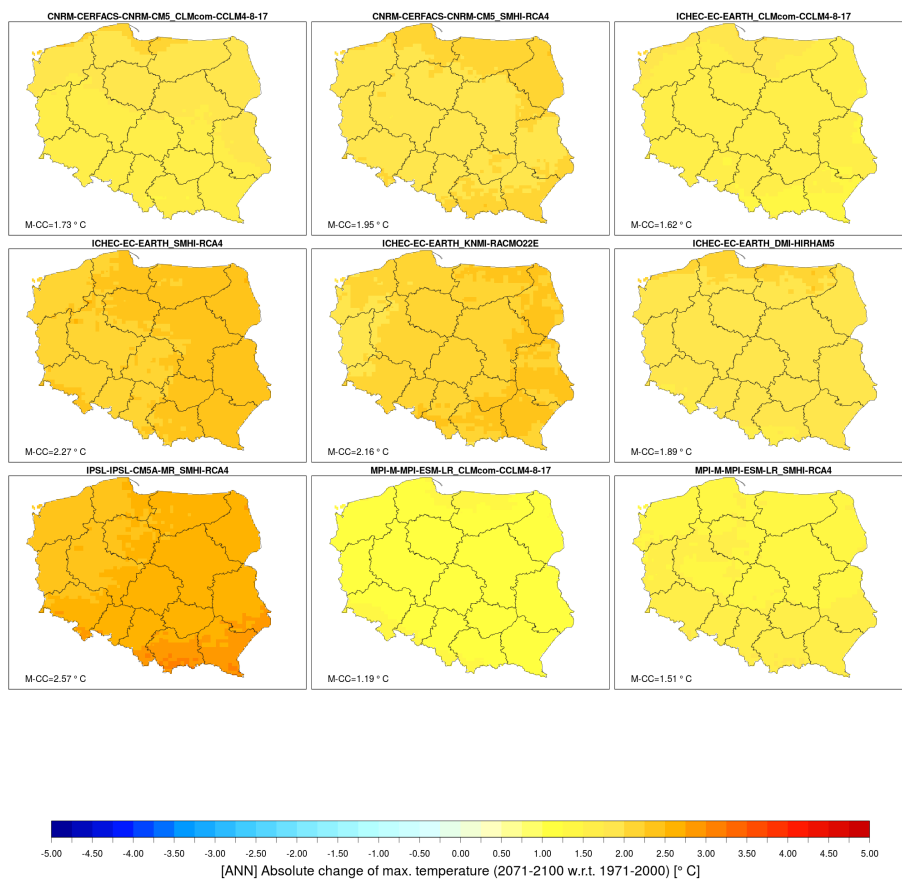

**SM 81.** Changes in projected annual means of daily maximum temperature by 2071–2100 assuming the RCP8.5 scenario. The maps show absolute changes with regards to the historical period (1971–2000) for all nine adjusted simulations.

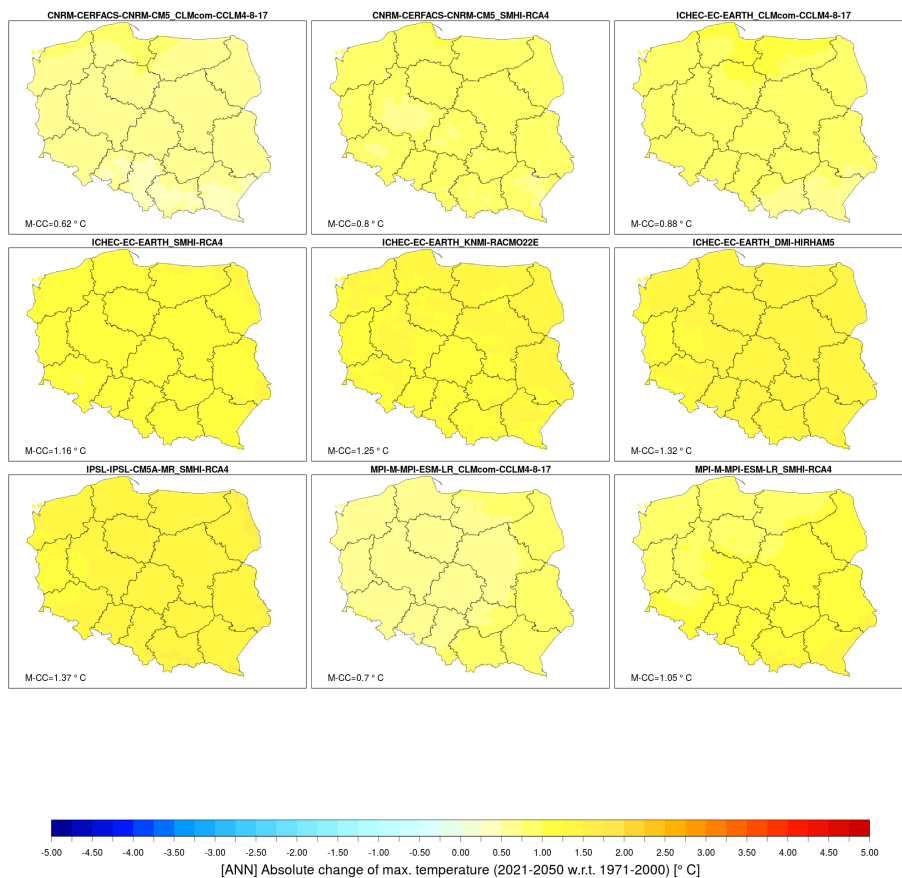

**SM 82.** Changes in projected annual means of daily maximum temperature by 2021–2050 assuming the RCP8.5 scenario. Absolute changes with regards to the historical period (1971–2000) for all nine adjusted simulations.

30 **5.2.2 Changes in seasonal means**

**5.2.3 Winter - DJF**

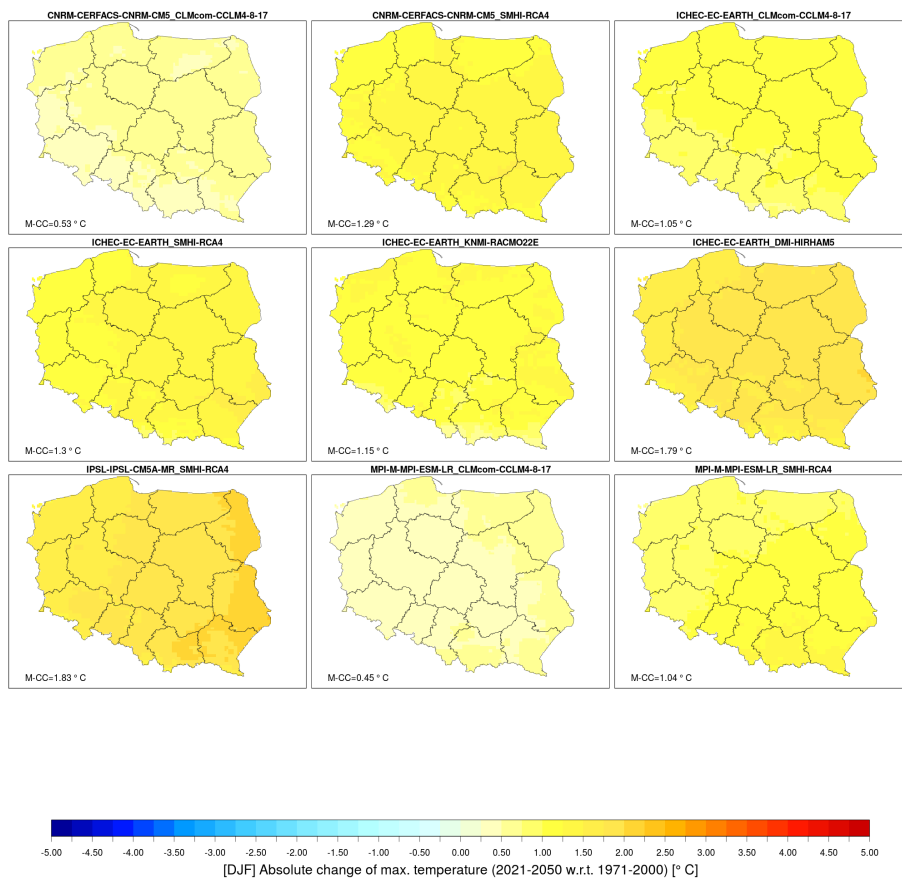

**SM 83.** Changes in projected winter means of daily maximum temperature by 2021–2050 assuming the RCP4.5 scenario. Absolute changes with regards to the historical period (1971–2000) for all nine adjusted simulations.

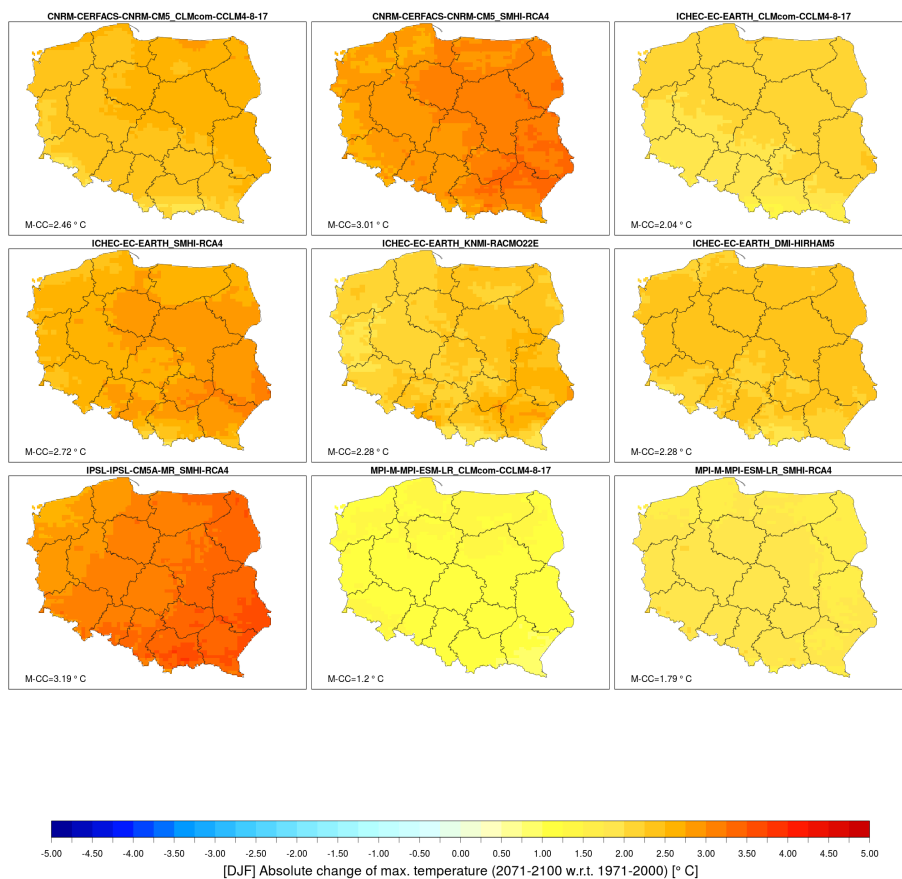

**SM 84.** Changes in projected winter means of daily maximum temperature by 2071–2100 assuming the RCP4.5 scenario. The maps show absolute changes with regards to the historical period (1971–2000) for all nine adjusted simulations.

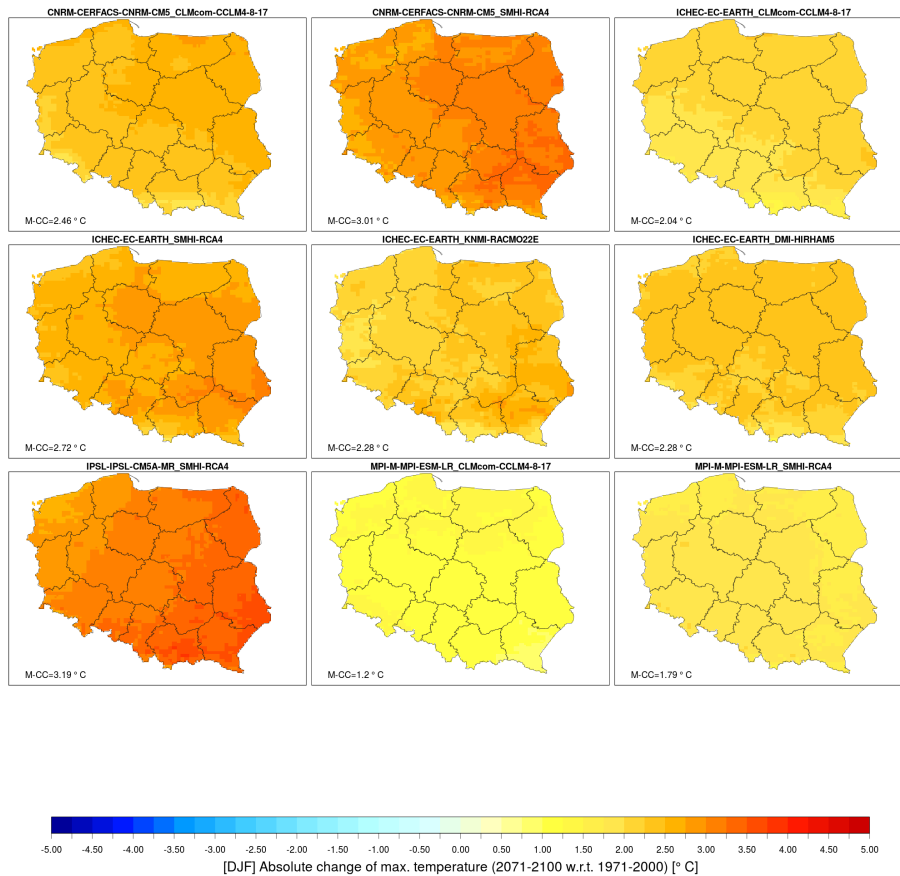

**SM 85.** Changes in projected winter means of daily maximum temperature by 2071–2100 assuming the RCP8.5 scenario. The maps show absolute changes with regards to the historical period (1971–2000) for all nine adjusted simulations.



**SM 86.** Changes in projected winter means of daily maximum temperature by 2021–2050 assuming the RCP8.5 scenario. Absolute changes with regards to the historical period (1971–2000) for all nine adjusted simulations.

#### **5.2.4 Spring - MAM**

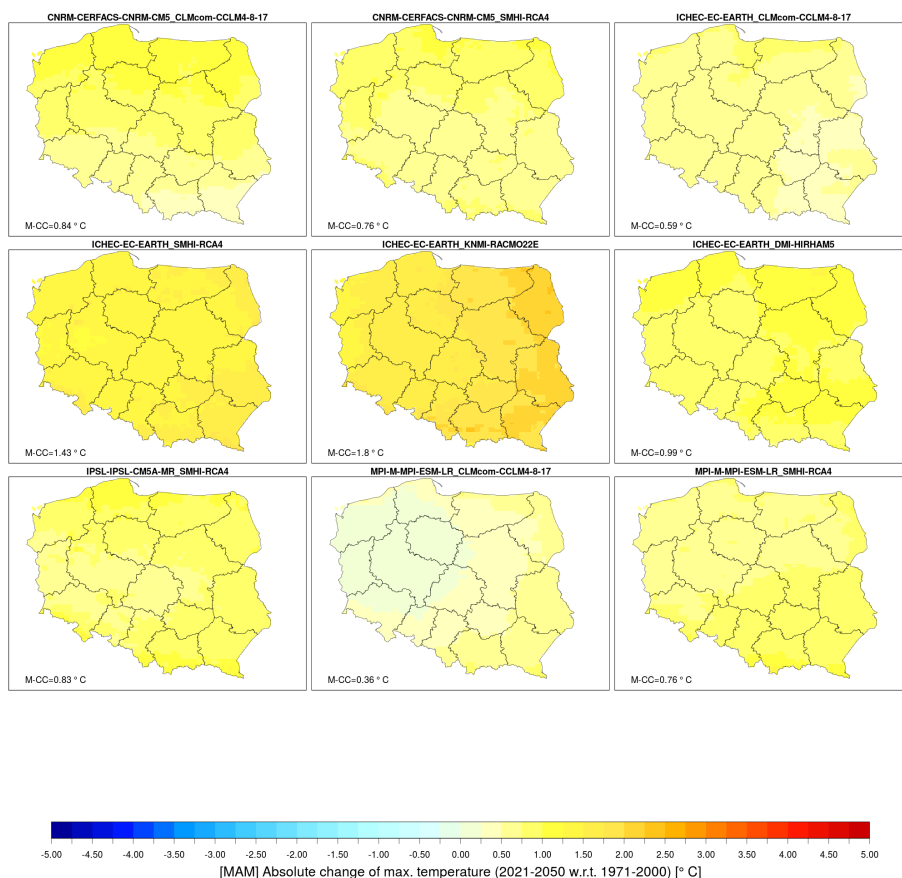

**SM 87.** Changes in projected spring means of daily maximum temperature by 2021–2050 assuming the RCP4.5 scenario. Absolute changes with regards to the historical period (1971–2000) for all nine adjusted simulations.

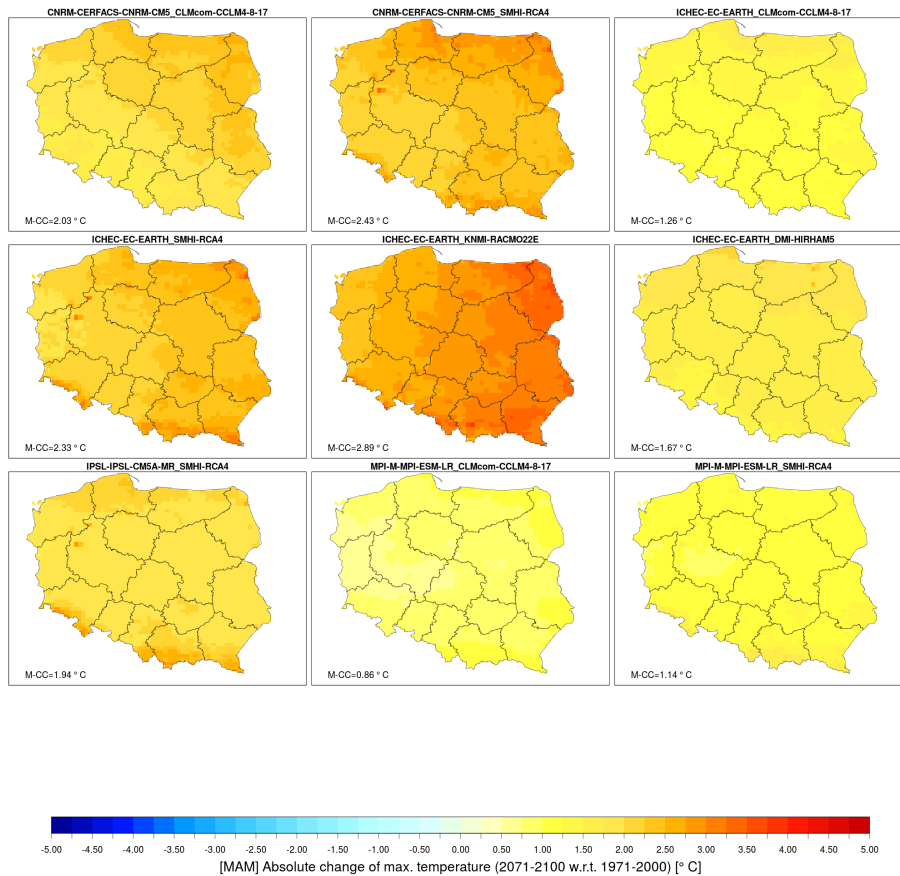

**SM 88.** Changes in projected spring means of daily maximum temperature by 2071–2100 assuming the RCP4.5 scenario. The maps show absolute changes with regards to the historical period (1971–2000) for all nine adjusted simulations.



**SM 89.** Changes in projected spring means of daily maximum temperature by 2071–2100 assuming the RCP8.5 scenario. The maps show absolute changes with regards to the historical period (1971–2000) for all nine adjusted simulations.

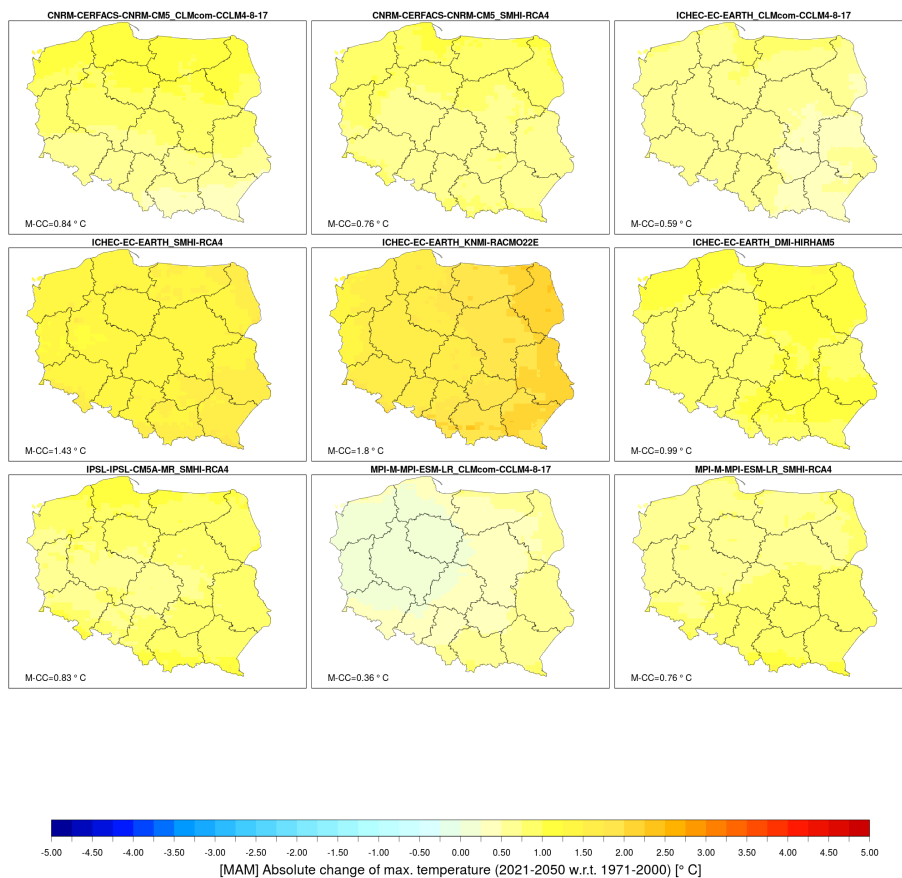

**SM 90.** Changes in projected spring means of daily maximum temperature by 2021–2050 assuming the RCP8.5 scenario. Absolute changes with regards to the historical period (1971–2000) for all nine adjusted simulations.

### **5.2.5 Summer - JJA**

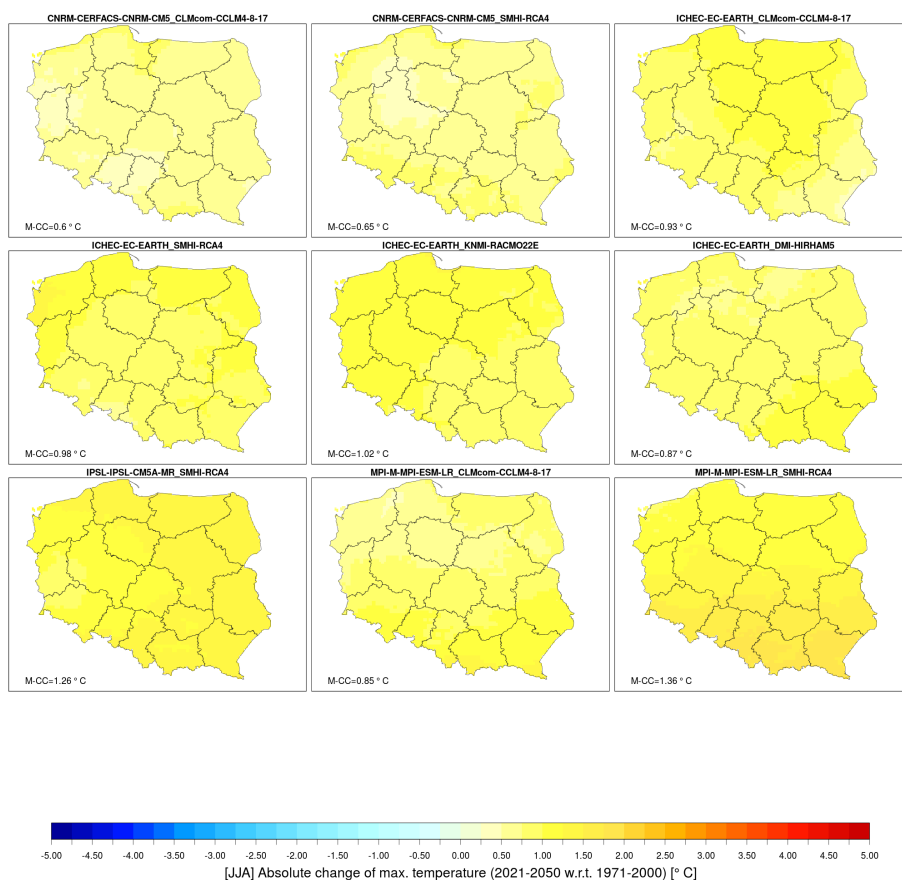

**SM 91.** Changes in projected summer means of daily maximum temperature by 2021–2050 assuming the RCP4.5 scenario. Absolute changes with regards to the historical period (1971–2000) for all nine adjusted simulations.

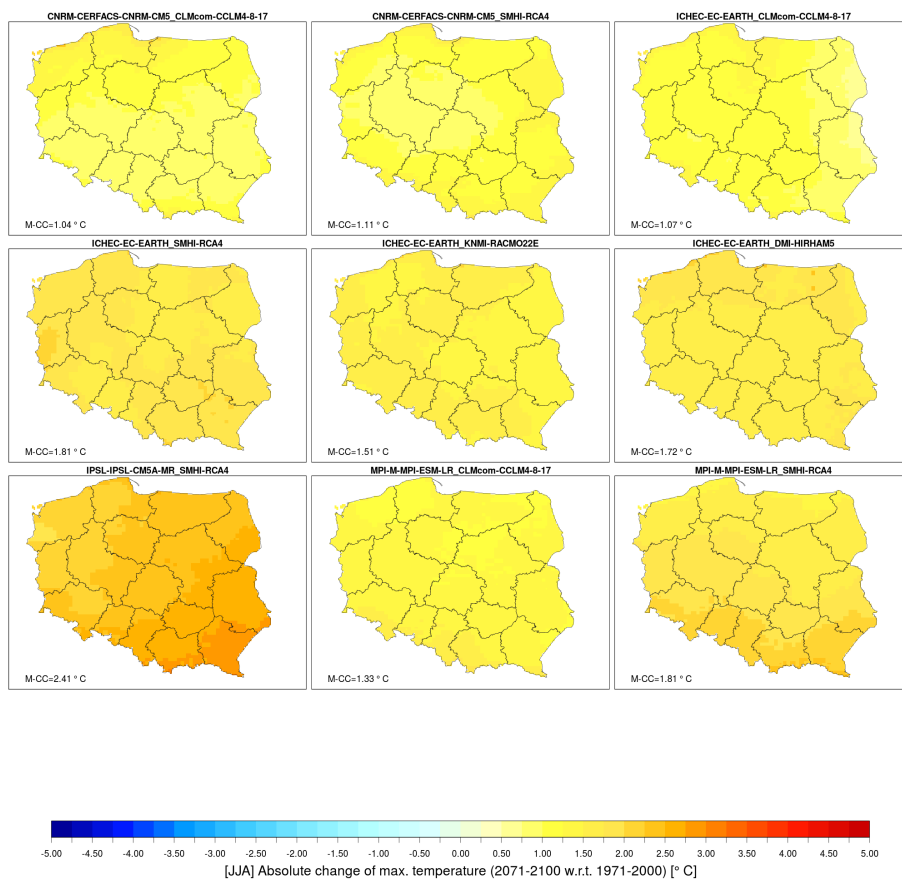

**SM 92.** Changes in projected summer means of daily maximum temperature by 2071–2100 assuming the RCP4.5 scenario. The maps show absolute changes with regards to the historical period (1971–2000) for all nine adjusted simulations.



**SM 93.** Changes in projected summer means of daily maximum temperature by 2071–2100 assuming the RCP8.5 scenario. The maps show absolute changes with regards to the historical period (1971–2000) for all nine adjusted simulations.



**SM 94.** Changes in projected summer means of daily maximum temperature by 2021–2050 assuming the RCP8.5 scenario. Absolute changes with regards to the historical period (1971–2000) for all nine adjusted simulations.

### **5.2.6 Autumn - SON**

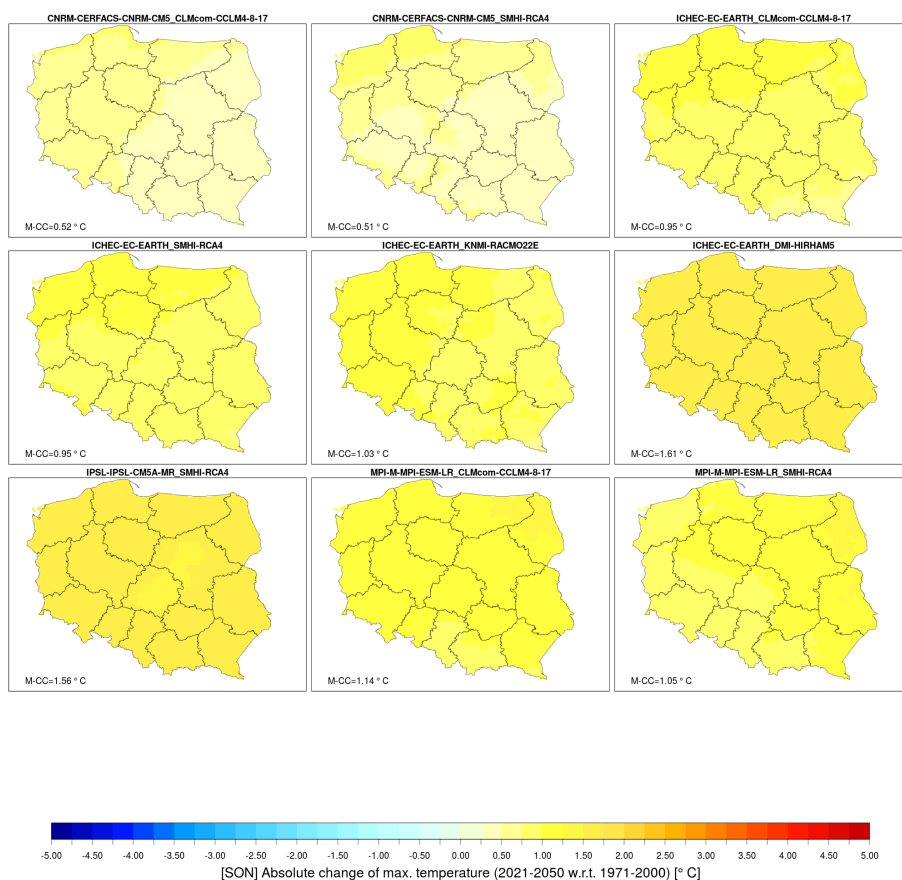

**SM 95.** Changes in projected autumn means of daily maximum temperature by 2021–2050 assuming the RCP4.5 scenario. Absolute changes with regards to the historical period (1971–2000) for all nine adjusted simulations.

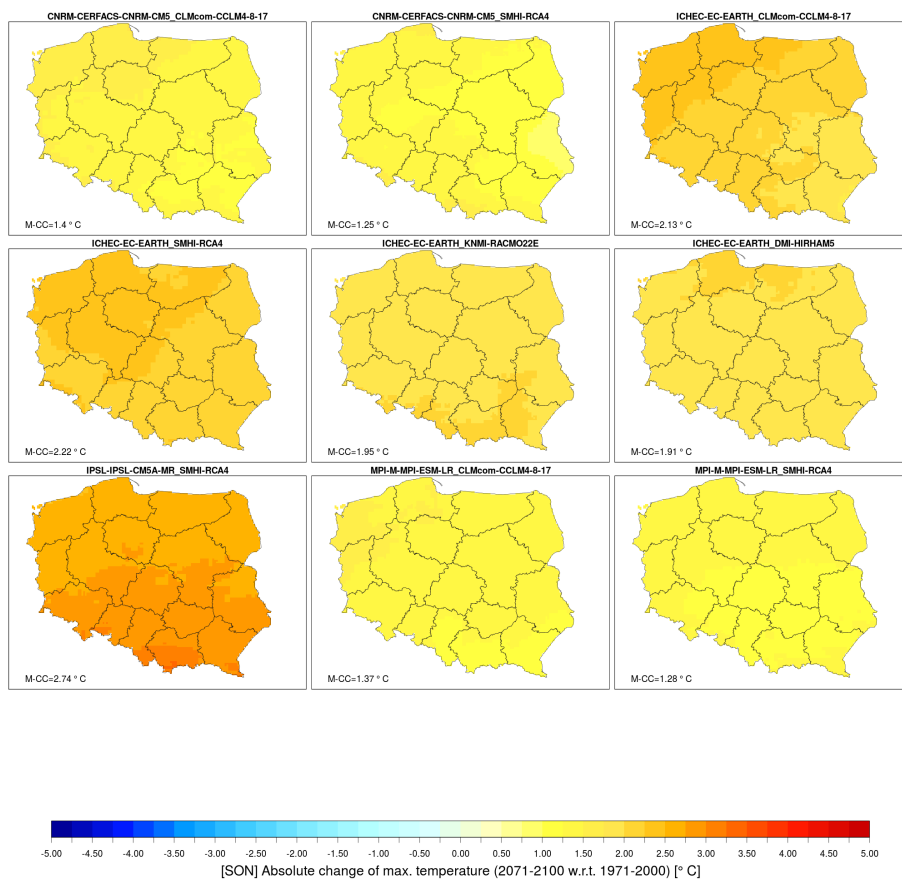

**SM 96.** Changes in projected autumn means of daily maximum temperature by 2071–2100 assuming the RCP4.5 scenario. The maps show absolute changes with regards to the historical period (1971–2000) for all nine adjusted simulations.



**SM 97.** Changes in projected autumn means of daily maximum temperature by 2071–2100 assuming the RCP8.5 scenario. The maps show absolute changes with regards to the historical period (1971–2000) for all nine adjusted simulations.



**SM 98.** Changes in projected autumn means of daily maximum temperature by 2021–2050 assuming the RCP8.5 scenario. Absolute changes with regards to the historical period (1971–2000) for all nine adjusted simulations.





**SM 99.** Changes in projected annual means of monthly sums of precipitation by 2071–2100 assuming the RCP8.5 scenario. The maps show relative changes with regards to the historical period (1971–2000) for all nine adjusted simulations.



**SM 100.** Changes in projected winter means of monthly sums of precipitation by 2021–2050 assuming the RC4.5 scenario. The maps show the relative changes with regards to the historical period (1971–2000) for all nine adjusted simulations.

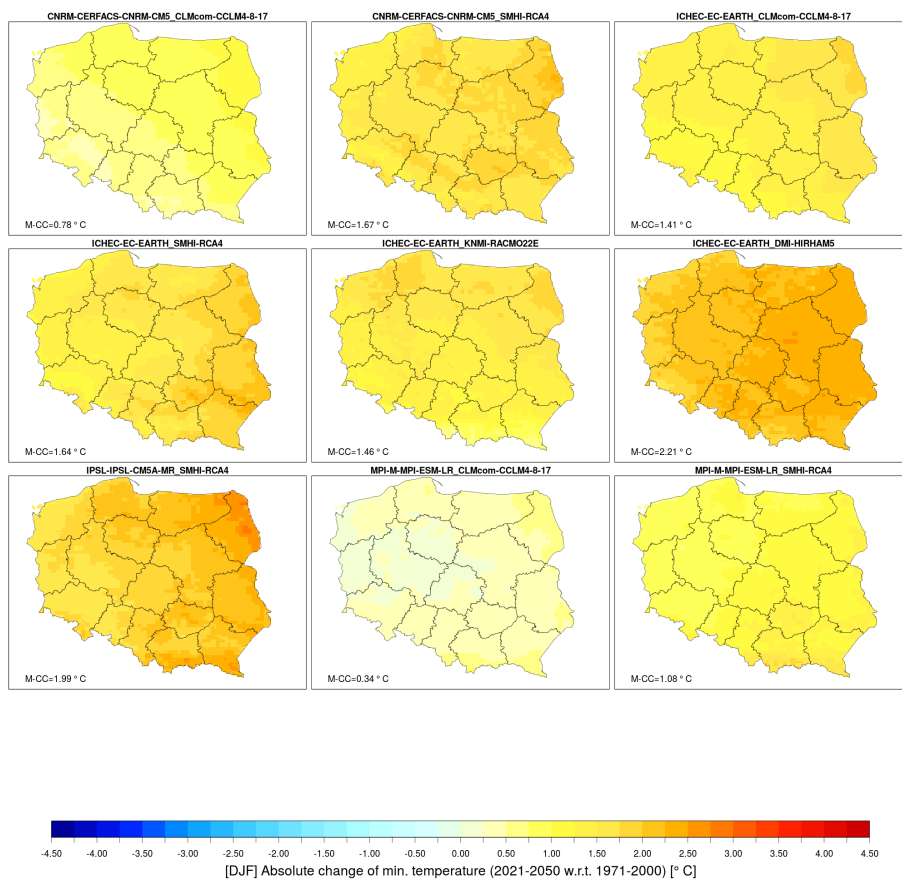

**SM 101.** Changes in projected annual means of daily minimum temperature by 2021–2050 assuming the RCP4.5 scenario. The maps show the absolute changes with regards to the historical period (1971–2000) for all nine adjusted simulations.

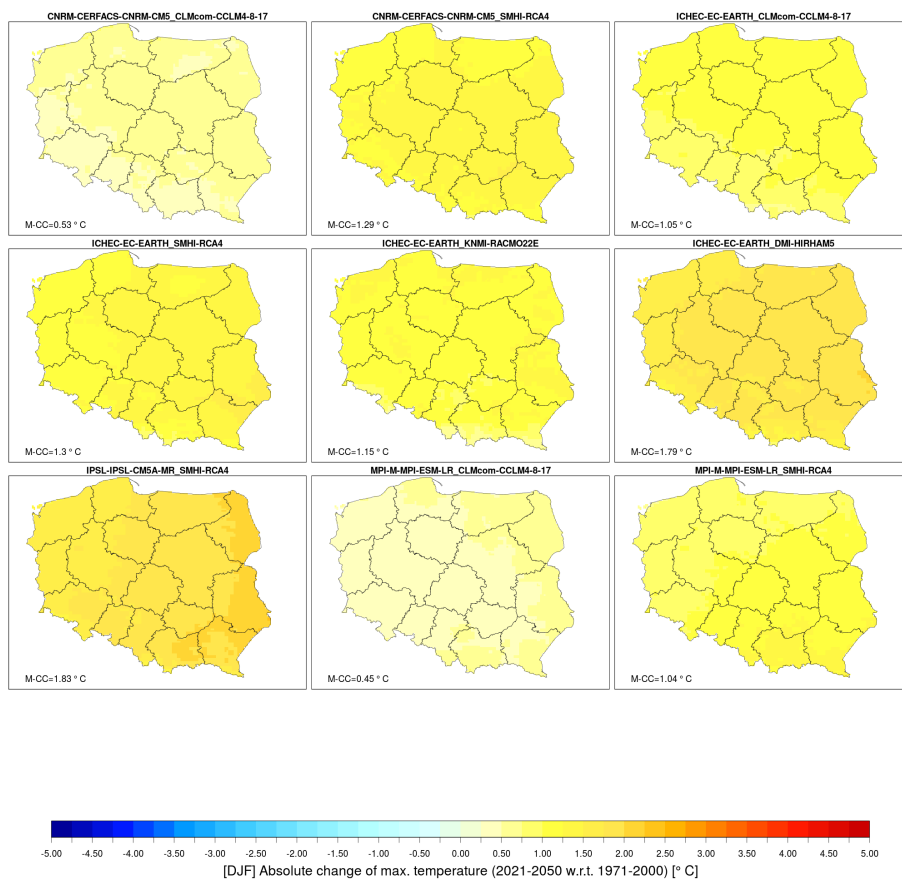

**SM 102.** Changes in projected winter means of daily maximum temperature by 2021–2050 assuming the RCP4.5 scenario. The maps show the absolute changes with regards to the historical period (1971–2000) for the nine adjusted simulations.



**SM 103.** Changes in projected spring means of monthly sums of precipitation by 2021–2050 assuming the RCP4.5 scenario. Relative changes between historical (1971–2000) and future (2020–2050) for all bias adjusted simulations assuming the RCP4.5.

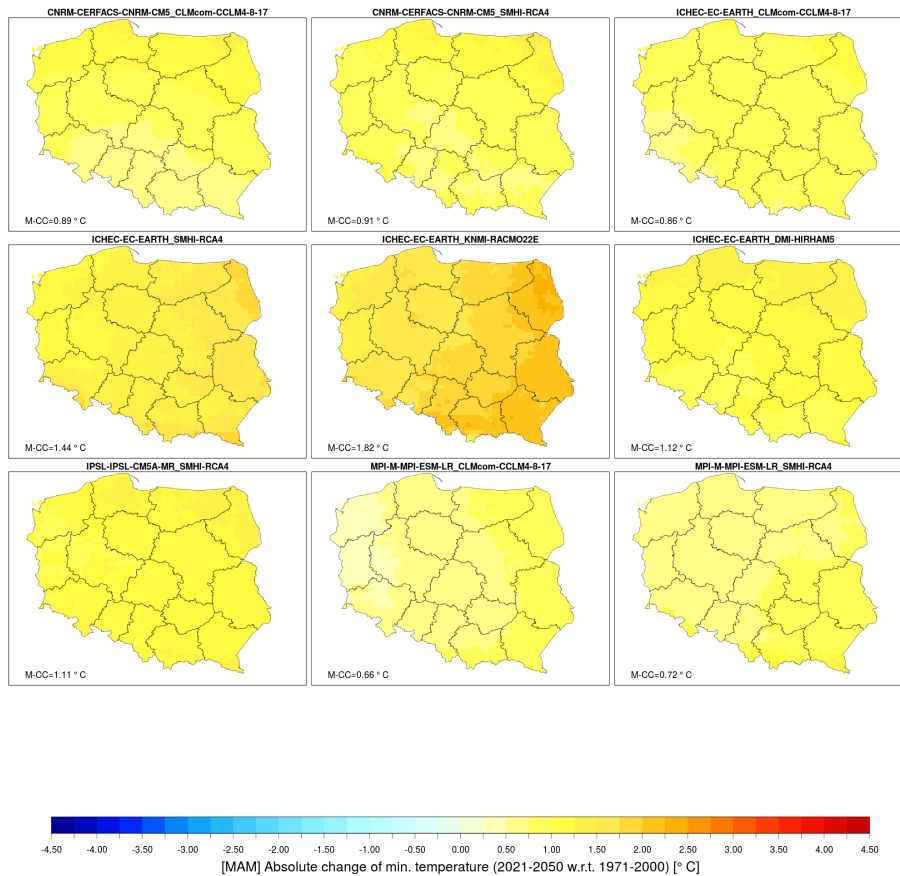

**SM 104.** Changes in projected spring means of daily minimum temperature by 2021–2050 assuming the RCP4.5 scenario. The maps show the absolute changes with regards to the historical period (1971–2000) for the nine adjusted simulations.

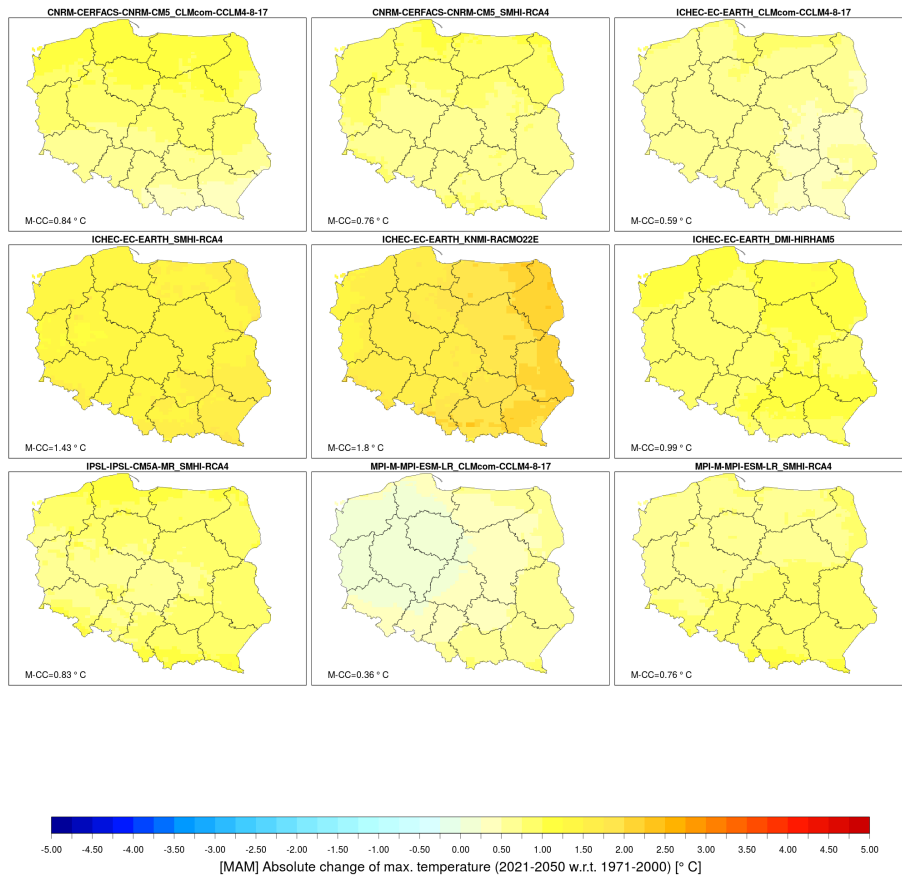

**SM 105.** Changes in projected spring means of daily maximum temperature by 2021–2050 assuming the RCP4.5 scenario. The maps show the absolute changes with regards to the historical period (1971–2000) for the nine adjusted simulations.



**SM 106.** Changes in projected summer means of monthly sums of precipitation by 2021–2050 assuming the RCP4.5 scenario. The maps show the relative changes with regards to the historical period (1971–2000) for the nine adjusted simulations.

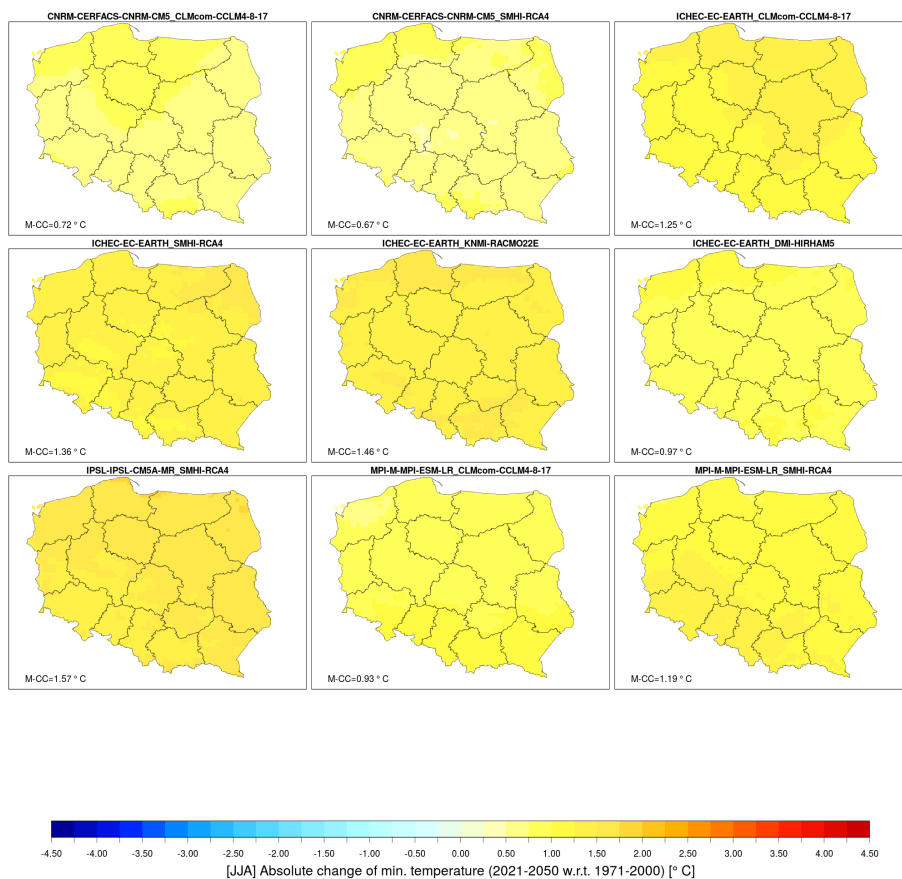

**SM 107.** Changes in projected summer means of daily minimum temperature by 2021–2050 assuming the RCP4.5 scenario.. The maps show the absolute changes with regards to the historical period (1971–2000) for the nine adjusted simulations.

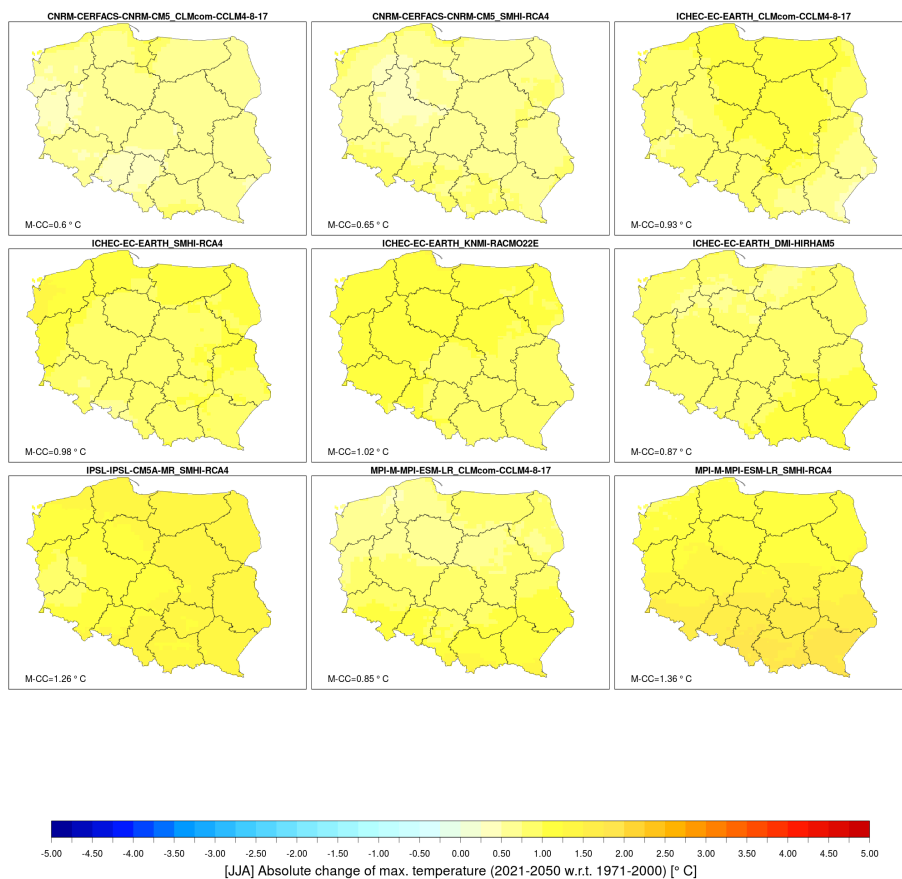

**SM 108.** Changes in projected summer means of daily maximum temperature by 2021–2050 assuming the RCP4.5 scenario. The maps show the absolute changes with regards to the historical period (1971–2000) for the nine adjusted simulations.

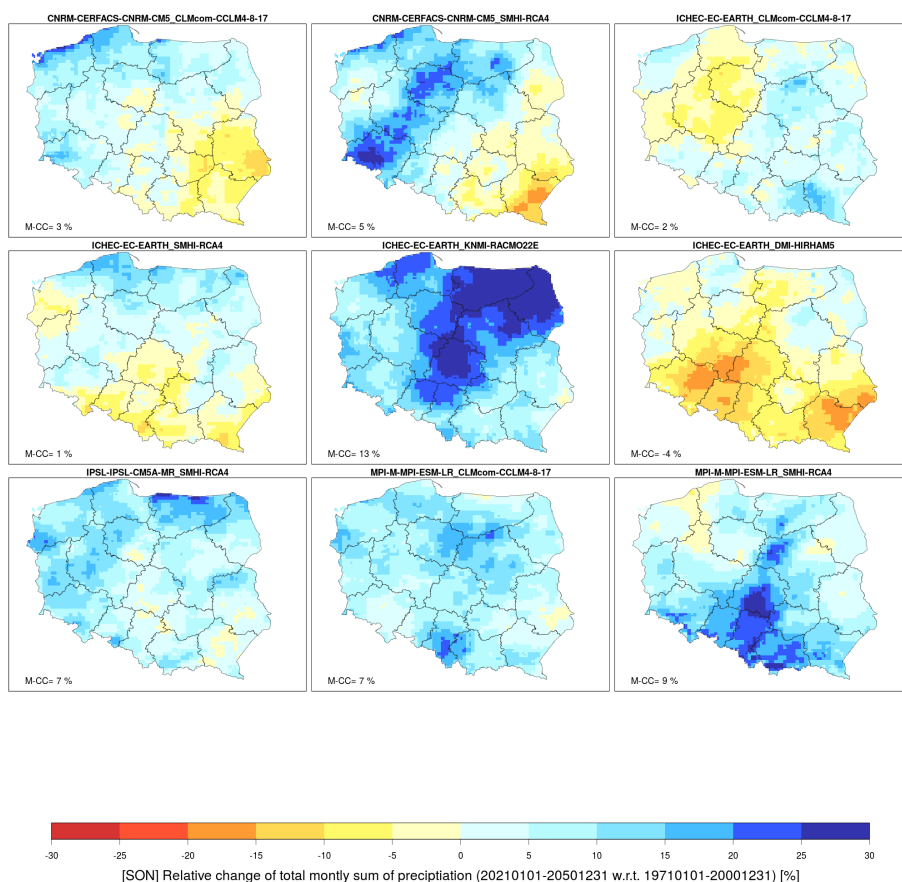

**SM 109.** Changes in projected autumn means of monthly sums of precipitation by 2021–2050 assuming the RCP4.5 scenario. Relative changes between historical (1971–2000) and future (2020–2050) for all bias adjusted simulations assuming the RCP4.5.

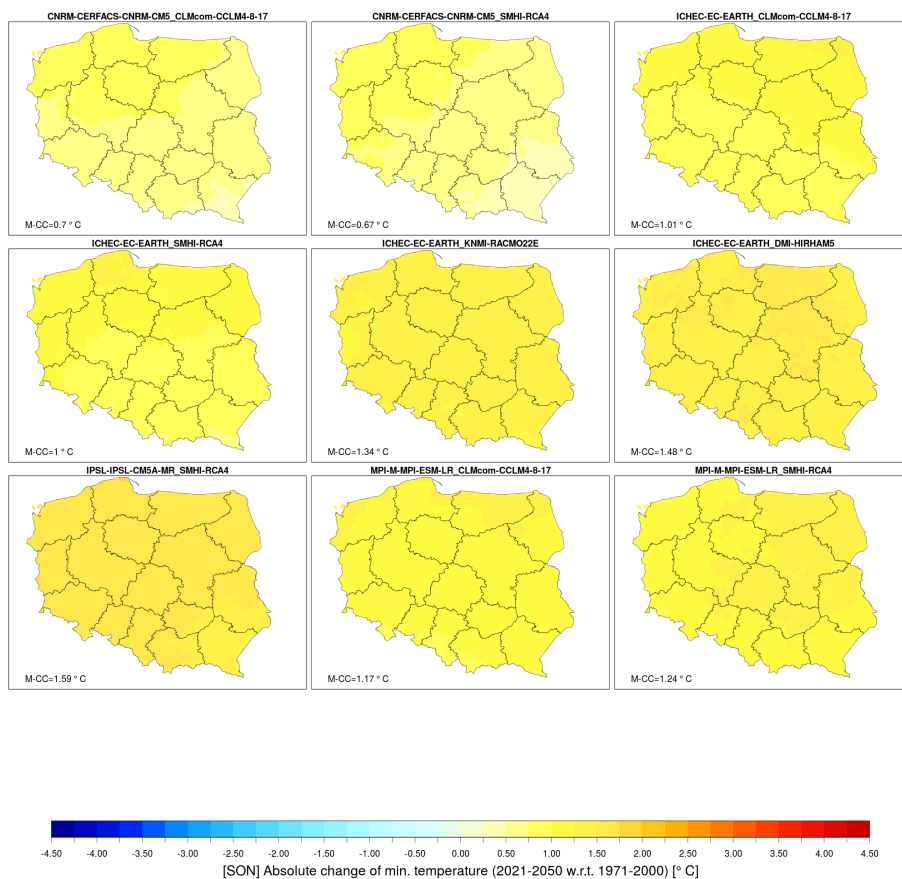

**SM 110.** Changes in projected autumn means of daily minimum temperature by 2021–2050 assuming the RCP4.5 scenario. The maps show the absolute changes with regards to the historical period (1971–2000) for the nine adjusted simulations.

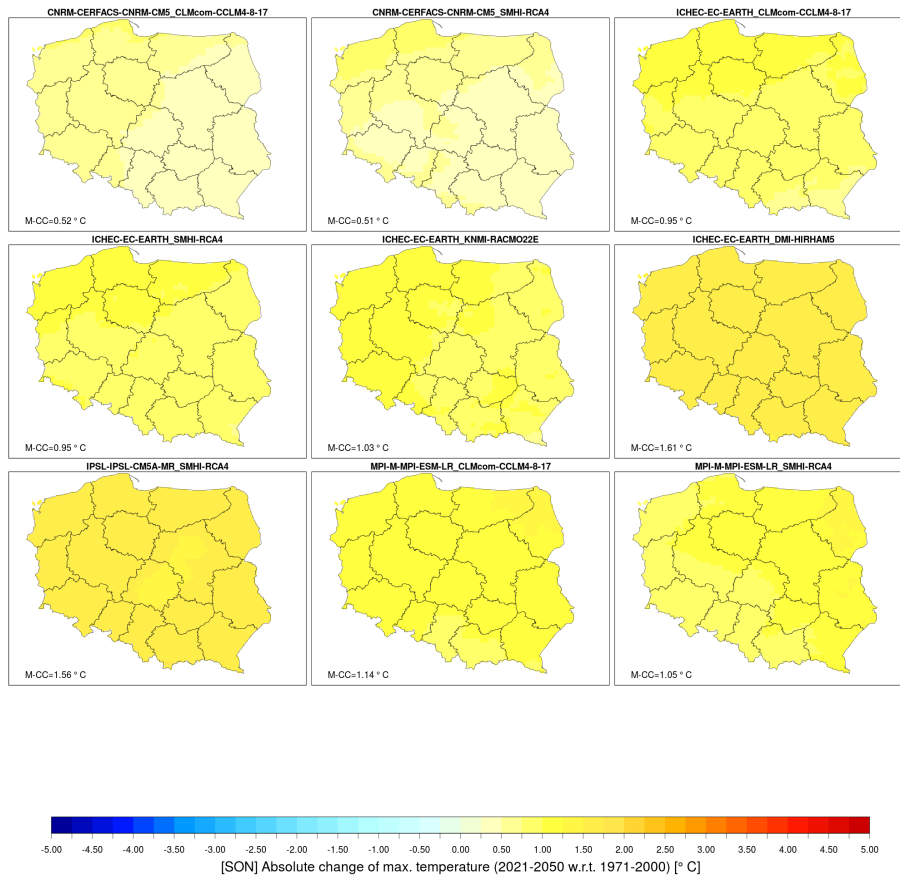

**SM 111.** Changes in projected autumn means of daily maximum temperature by 2021–2050 assuming the RCP4.5 scenario. The maps show the absolute changes with regards to the historical period (1971–2000) for the nine adjusted simulations.

### **5.3 Projected minimum temperature**

#### **5.3.1 Changes in annual means**

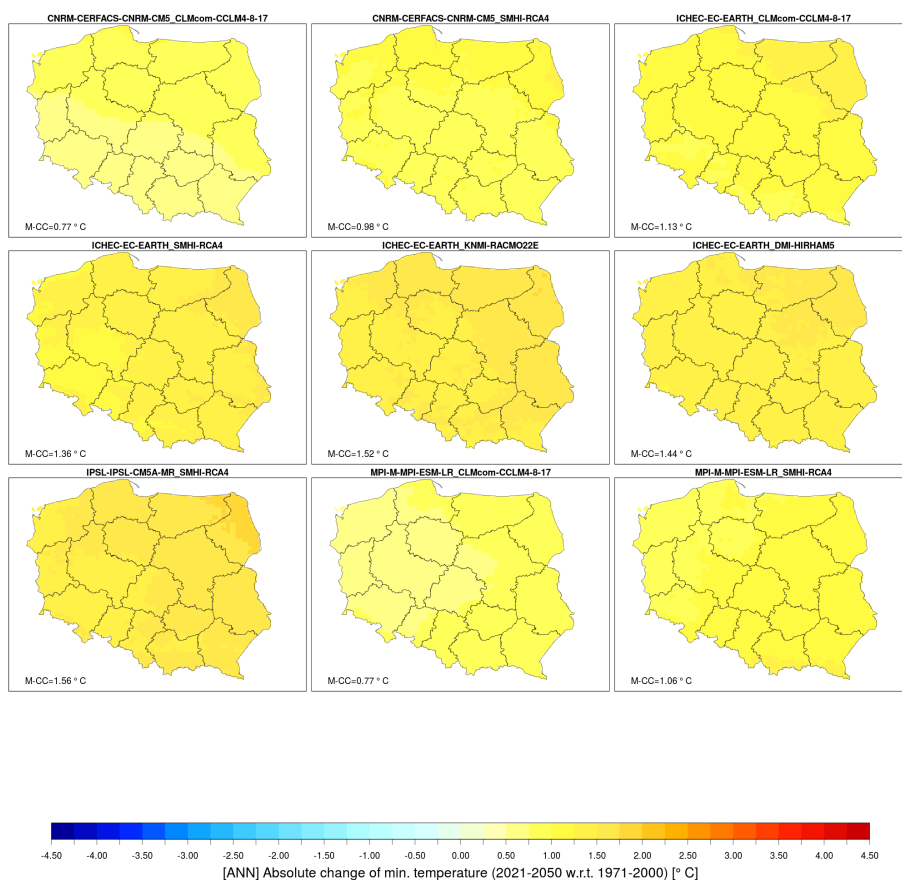

**SM 112.** Changes in projected annual means of daily minimum temperature by 2021–2050 assuming the RCP4.5 scenario. Absolute changes with regards to the historical period (1971–2000) for all nine adjusted simulations.

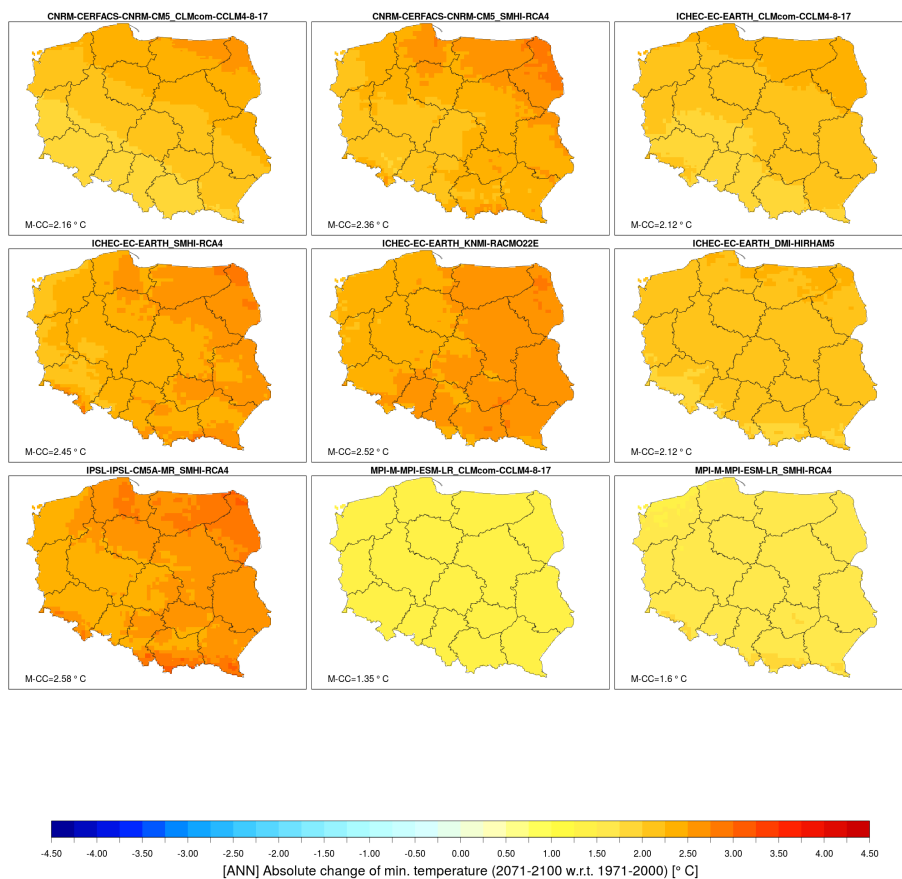

**SM 113.** Changes in projected annual means of daily minimum temperature by 2071–2100 assuming the RCP4.5 scenario. The maps show absolute changes with regards to the historical period (1971–2000) for all nine adjusted simulations.

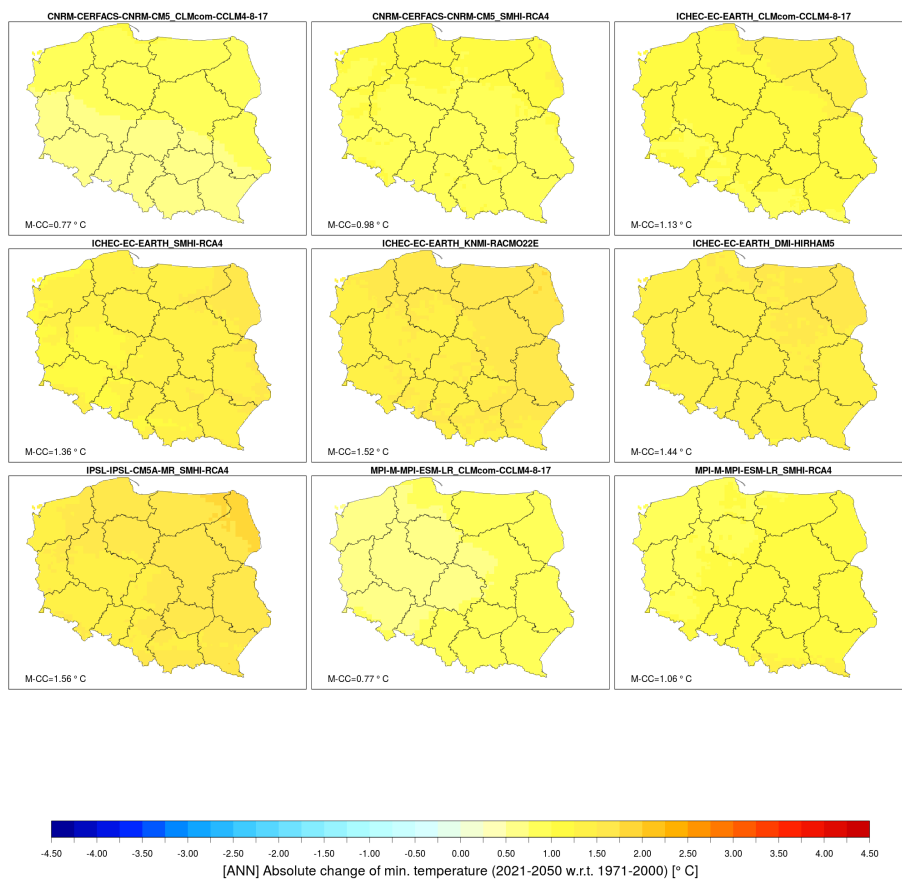

**SM 114.** Changes in projected annual means of daily minimum temperature by 2021–2050 assuming the RCP8.5 scenario. The maps show absolute changes with regards to the historical period (1971–2000) for all nine adjusted simulations.

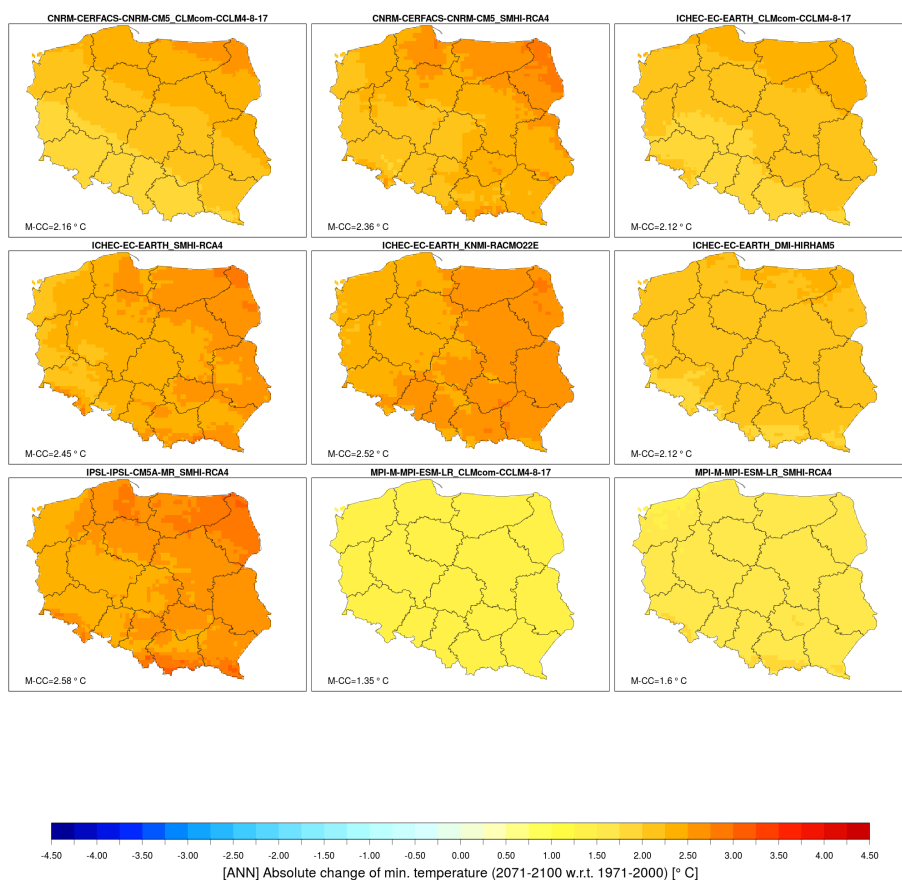

**SM 115.** Changes in projected annual means of daily minimum temperature by 2071–2100 assuming the RCP8.5 scenario. Absolute changes with regards to the historical period (1971–2000) for all nine adjusted simulations.

### **5.3.2 Changes in seasonal means**

#### **5.3.3 Winter - DJF**

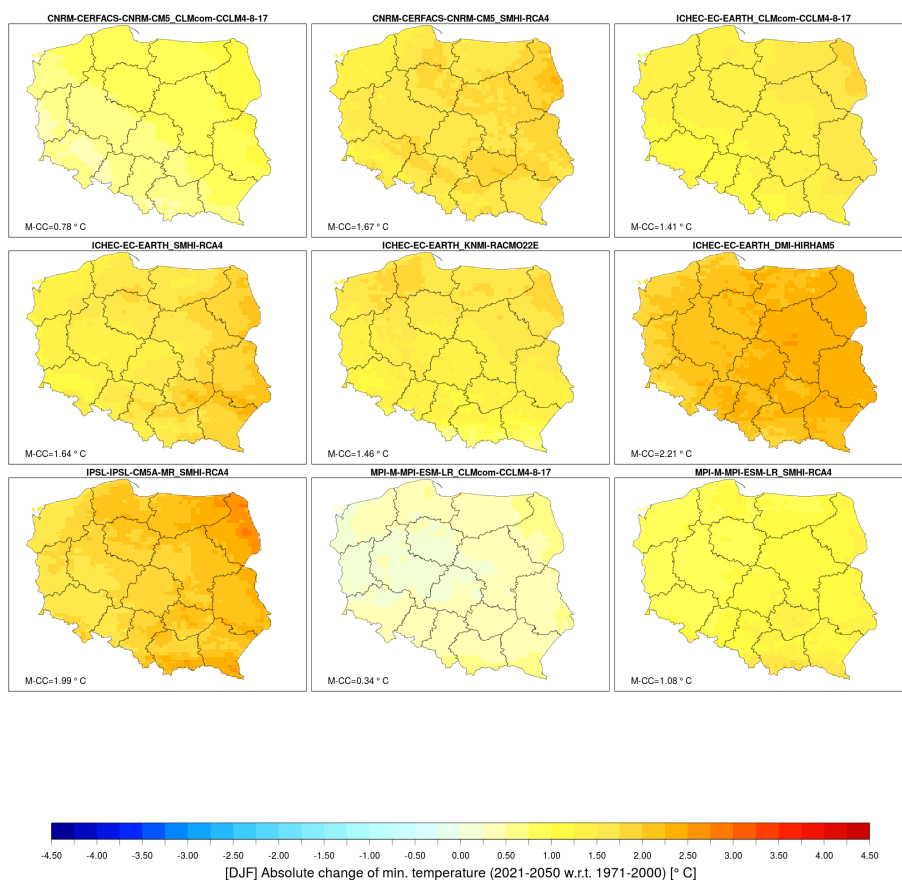

**SM 116.** Changes in projected winter means of daily minimum temperature by 2021–2050 assuming the RCP4.5 scenario. Absolute changes with regards to the historical period (1971–2000) for all nine adjusted simulations.

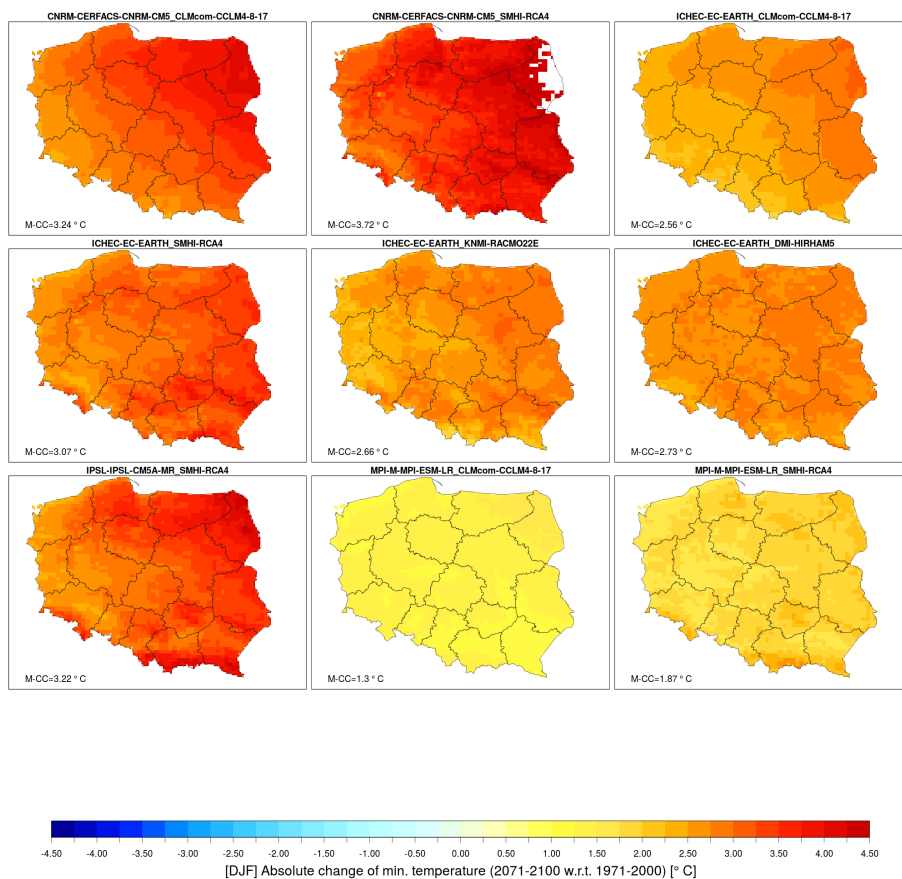

**SM 117.** Changes in projected winter means of daily minimum temperature by 2071–2100 assuming the RCP4.5 scenario. The maps show absolute changes with regards to the historical period (1971–2000) for all nine adjusted simulations.



**SM 118.** Changes in projected winter means of daily minimum temperature by 2071–2100 assuming the RCP8.5 scenario. The maps show absolute changes with regards to the historical period (1971–2000) for all nine adjusted simulations.



**SM 119.** Changes in projected winter means of daily minimum temperature by 2021–2050 assuming the RCP8.5 scenario. Absolute changes with regards to the historical period (1971–2000) for all nine adjusted simulations.



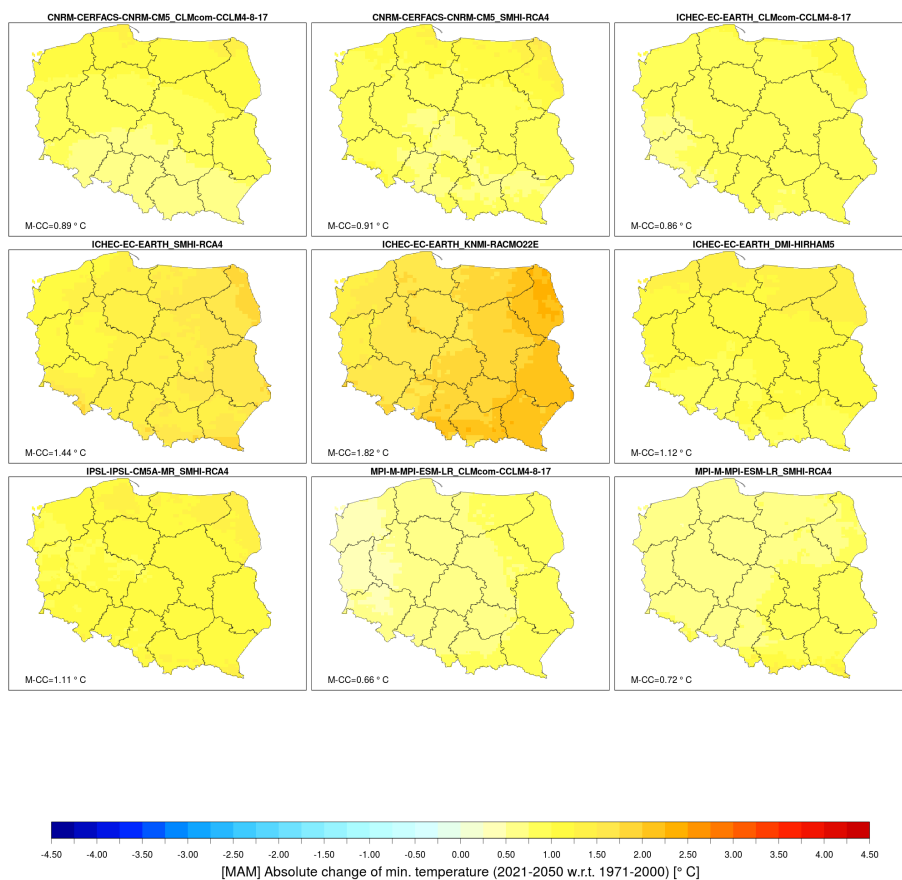

**SM 120.** Changes in projected spring means of daily minimum temperature by 2021–2050 assuming the RCP4.5 scenario. Absolute changes with regards to the historical period (1971–2000) for all nine adjusted simulations.

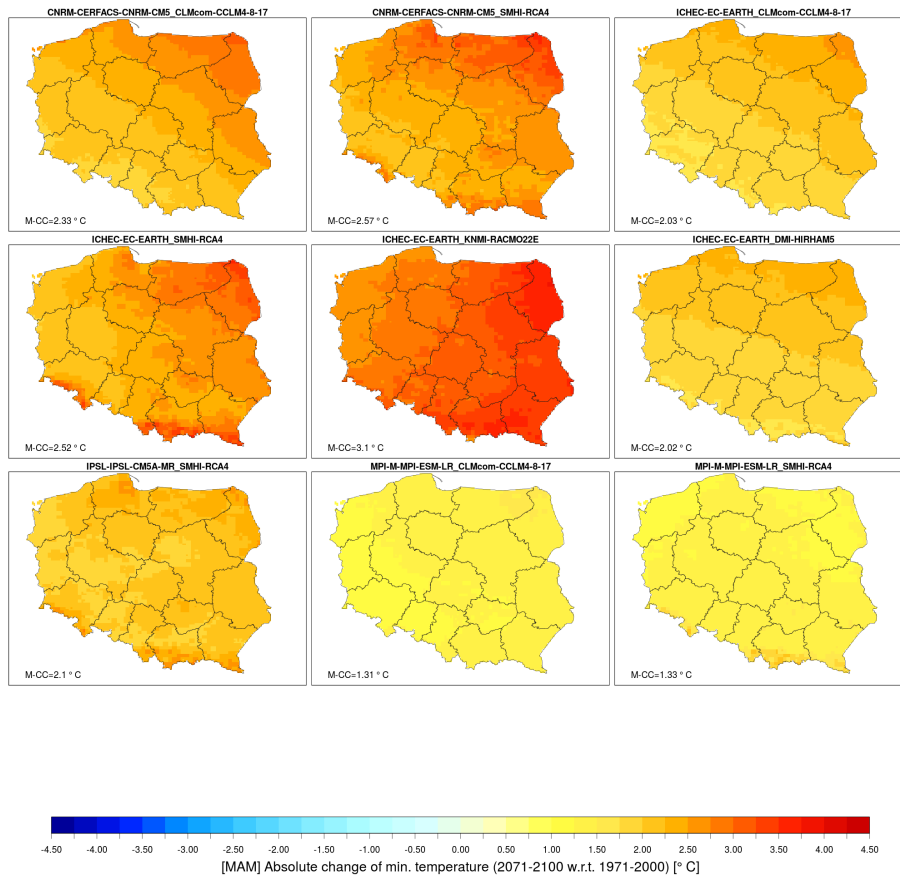

**SM 121.** Changes in projected spring means of daily minimum temperature by 2071–2100 assuming the RCP4.5 scenario. The maps show absolute changes with regards to the historical period (1971–2000) for all nine adjusted simulations.



**SM 122.** Changes in projected spring means of daily minimum temperature by 2071–2100 assuming the RCP8.5 scenario. The maps show absolute changes with regards to the historical period (1971–2000) for all nine adjusted simulations.

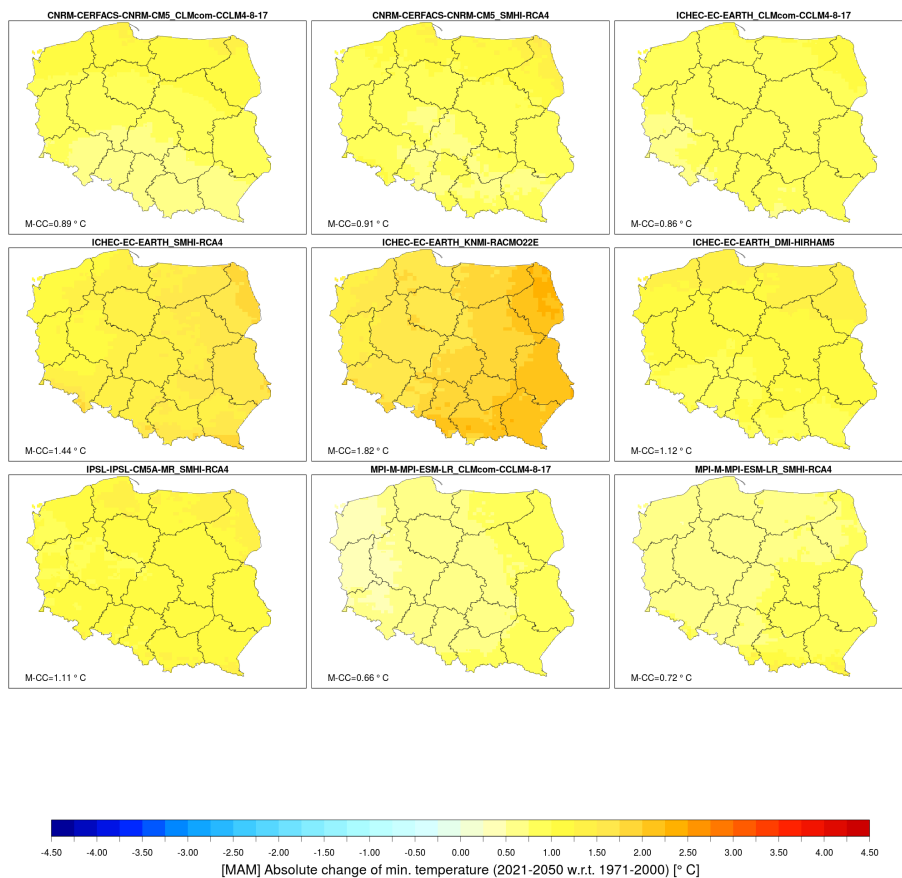

**SM 123.** Changes in projected spring means of daily minimum temperature by 2021–2050 assuming the RCP8.5 scenario. Absolute changes with regards to the historical period (1971–2000) for all nine adjusted simulations.

### 5.3.5 Summer - JJA

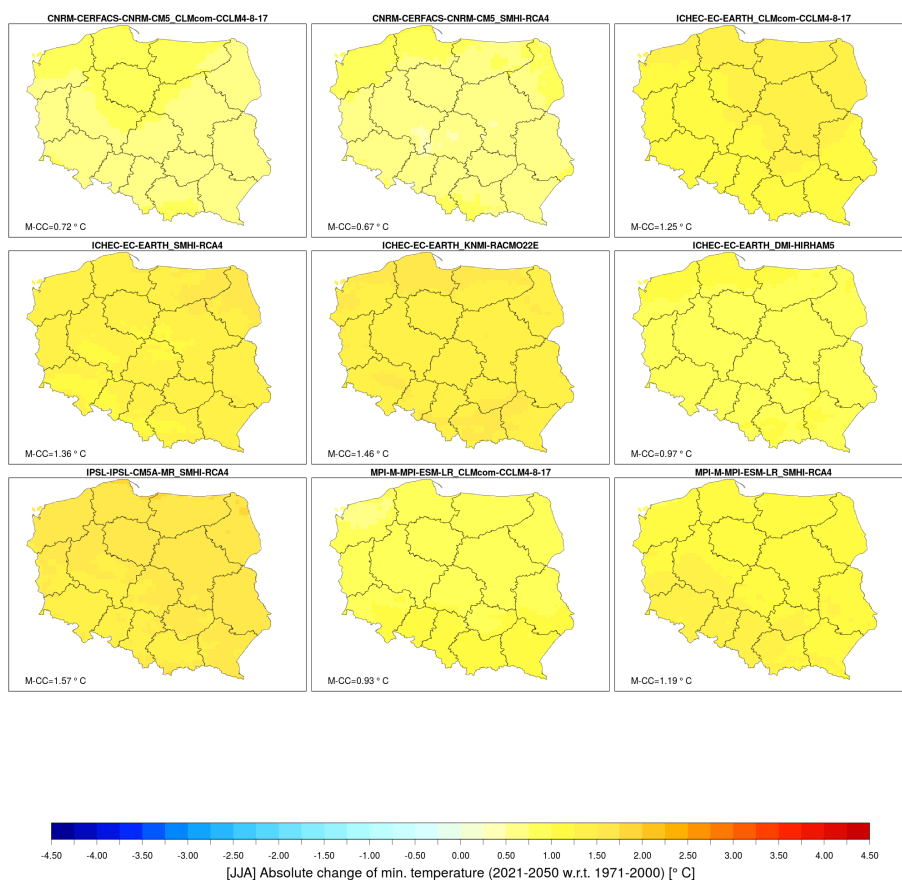

**SM 124.** Changes in projected summer means of daily minimum temperature by 2021–2050 assuming the RCP4.5 scenario. Absolute changes with regards to the historical period (1971–2000) for all nine adjusted simulations.

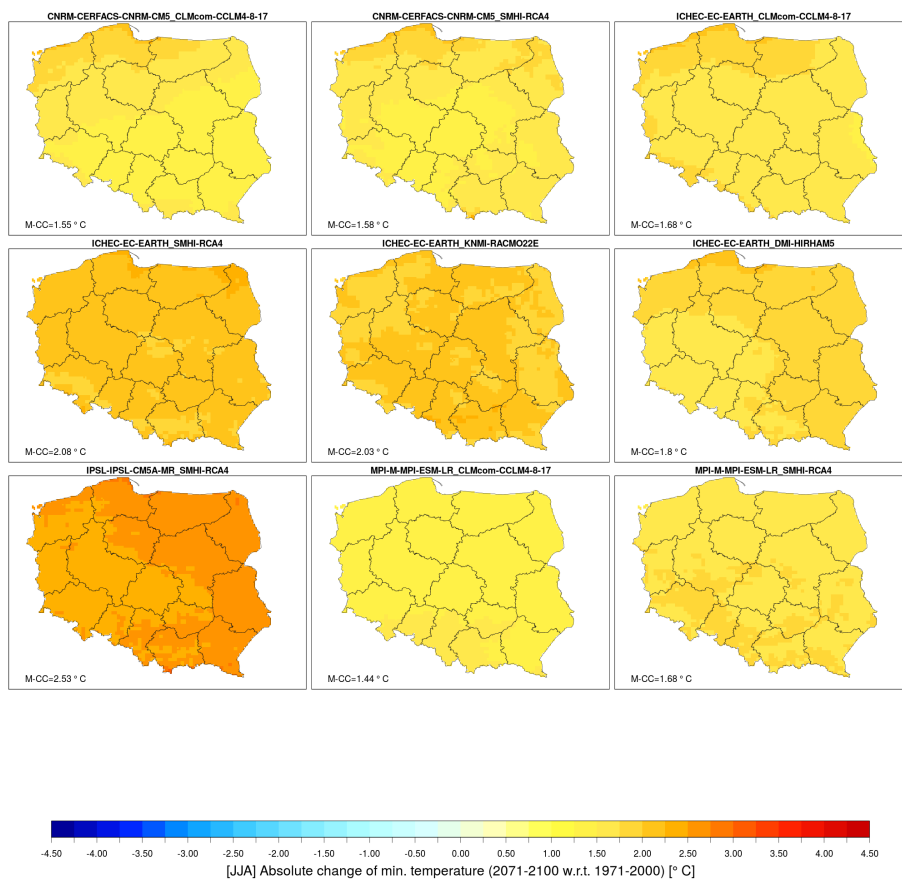

**SM 125.** Changes in projected summer means of daily minimum temperature by 2071–2100 assuming the RCP4.5 scenario. The maps show absolute changes with regards to the historical period (1971–2000) for all nine adjusted simulations.



**SM 126.** Changes in projected summer means of daily minimum temperature by 2071–2100 assuming the RCP8.5 scenario. The maps show absolute changes with regards to the historical period (1971–2000) for all nine adjusted simulations.



**SM 127.** Changes in projected summer means of daily minimum temperature by 2021–2050 assuming the RCP8.5 scenario. Absolute changes with regards to the historical period (1971–2000) for all nine adjusted simulations.

### **5.3.6 Autumn - SON**

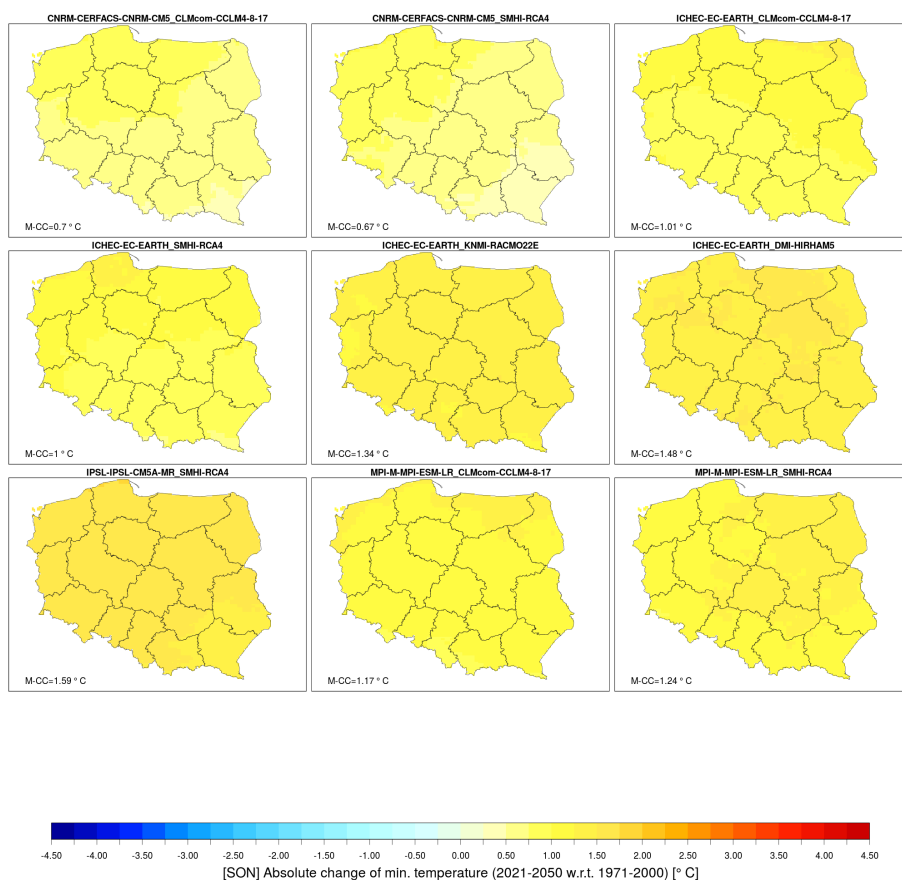

**SM 128.** Changes in projected autumn means of daily minimum temperature by 2021–2050 assuming the RCP4.5 scenario. Absolute changes with regards to the historical period (1971–2000) for all nine adjusted simulations.

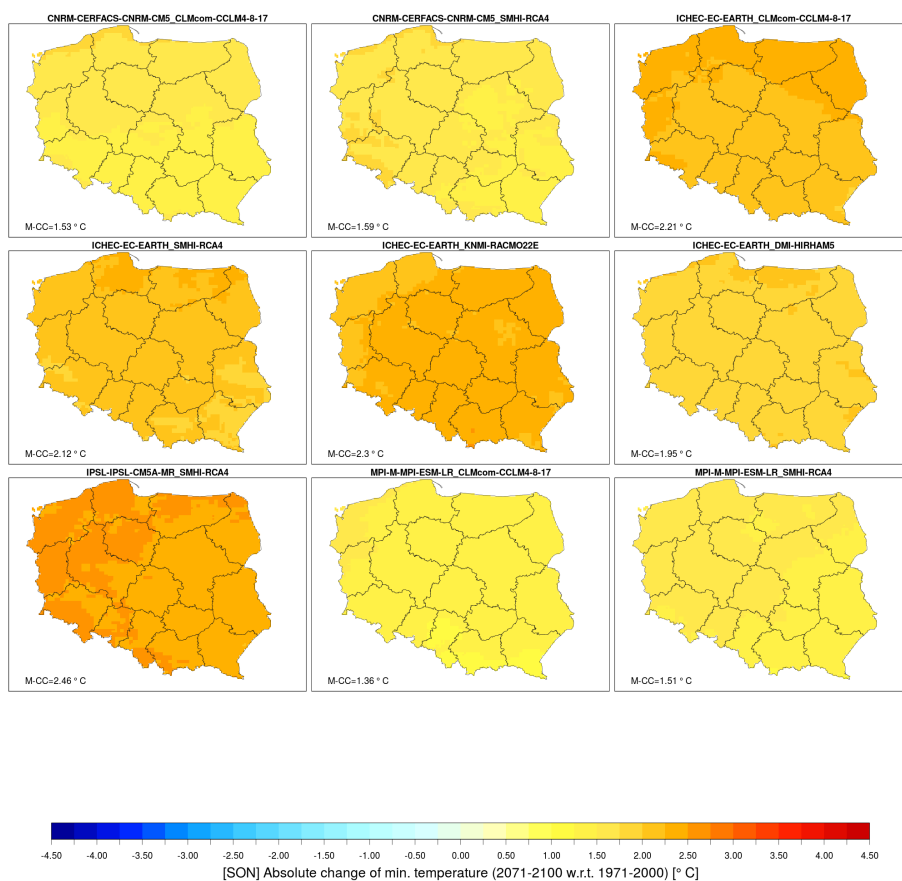

**SM 129.** Changes in projected autumn means of daily minimum temperature by 2071–2100 assuming the RCP4.5 scenario. The maps show absolute changes with regards to the historical period (1971–2000) for all nine adjusted simulations.



**SM 130.** Changes in projected autumn means of daily minimum temperature by 2071–2100 assuming the RCP8.5 scenario. The maps show absolute changes with regards to the historical period (1971–2000) for all nine adjusted simulations.



**SM 131.** Changes in projected autumn means of daily maximum temperature by 2021–2050 assuming the RCP8.5 scenario. Absolute changes with regards to the historical period (1971–2000) for all nine adjusted simulations.



**SM 132.** Changes in projected annual means of monthly sums of precipitation by 2071–2100 assuming the RCP8.5 scenario. The maps show relative changes with regards to the historical period (1971–2000) for all nine adjusted simulations.

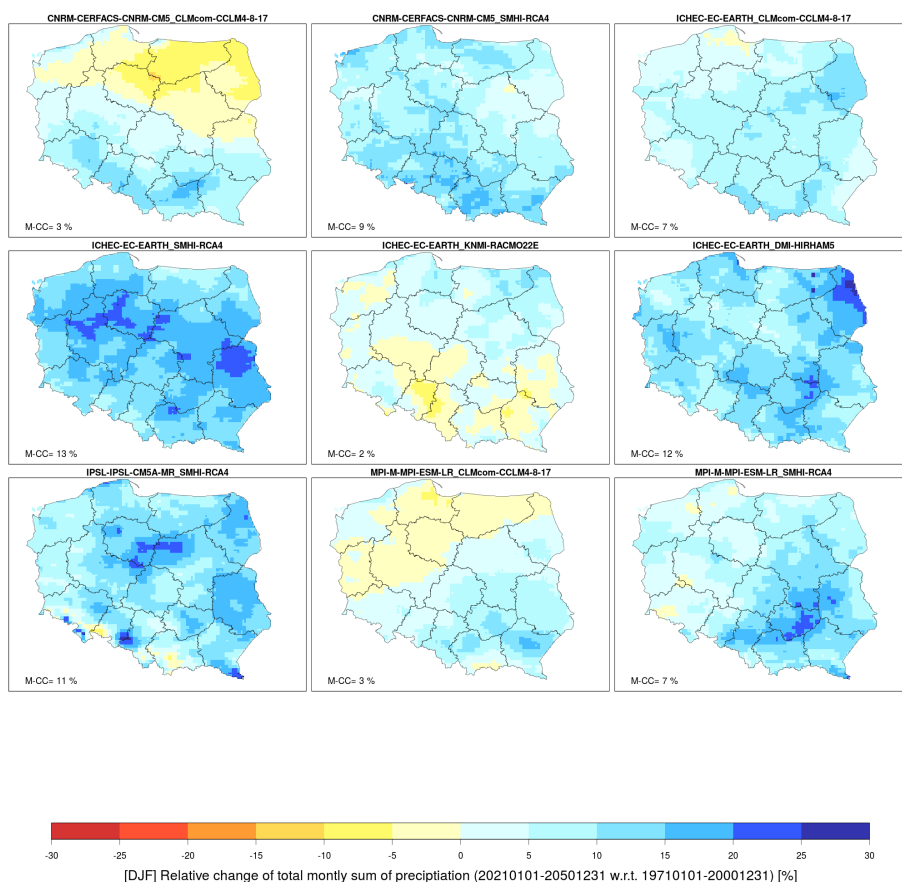

**SM 133.** Changes in projected winter means of monthly sums of precipitation by all model simulations. The maps show the relative changes with regards to the historical period (1971–2000) for all nine adjusted simulations.

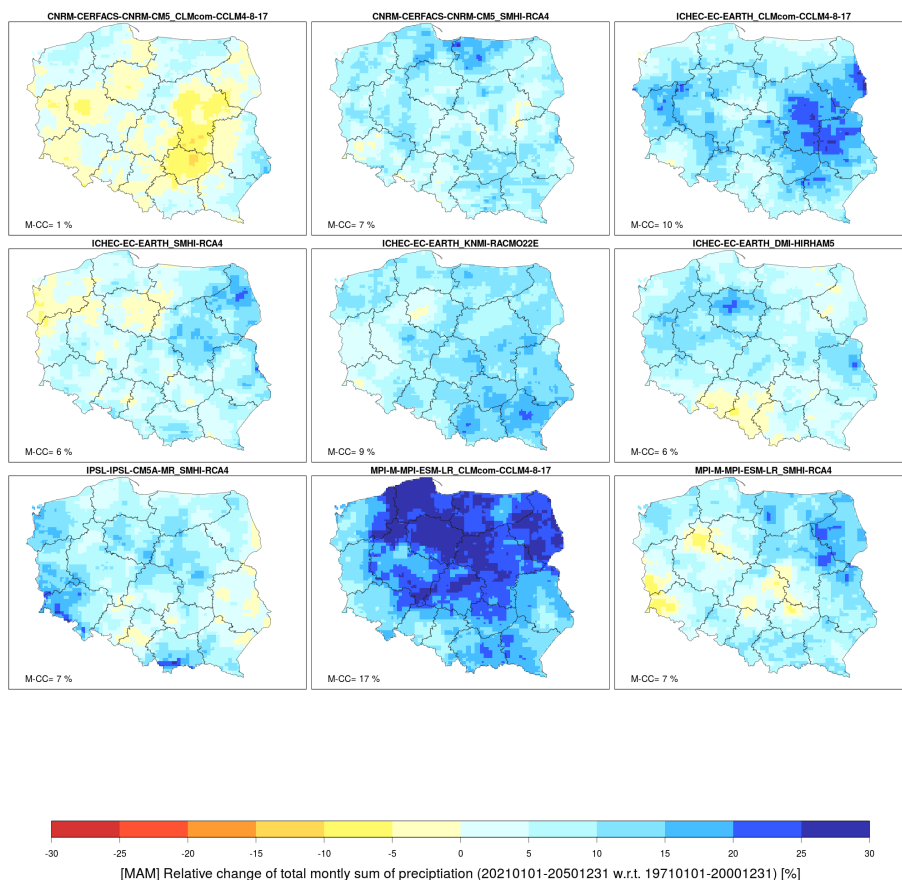

**SM 134.** Changes in projected spring means of monthly sums of precipitation by 2021–2050 assuming the RCP4.5 scenario. Relative changes between historical (1971–2000) and future (2020–2050) for all bias adjusted simulations assuming the RCP4.5.



**SM 135.** Changes in projected summer means of monthly sums of precipitation by 2021–2050 assuming the RCP4.5 scenario. The maps show the relative changes with regards to the historical period (1971–2000) for the nine adjusted simulations.

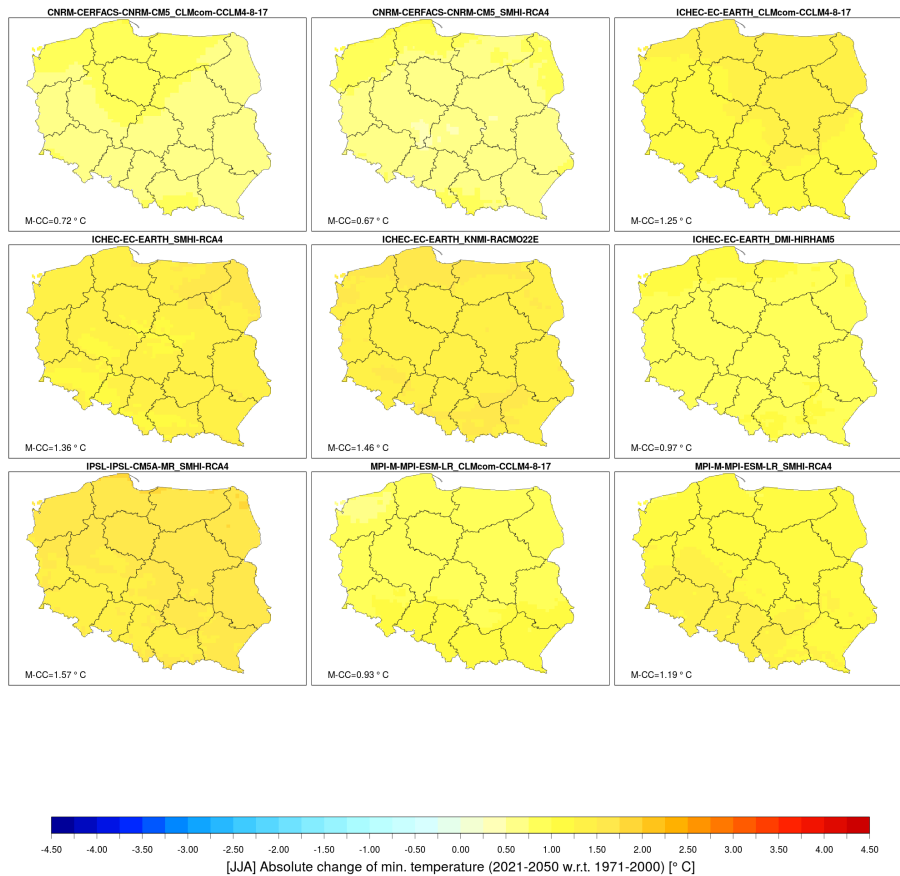

**SM 136.** Changes in projected summer means of daily minimum temperature by 2021–2050 assuming the RCP4.5 scenario. The maps show the absolute changes with regards to the historical period (1971–2000) for the nine adjusted simulations.



**SM 137.** Changes in projected summer means of daily maximum temperature by 2021–2050 assuming the RCP4.5 scenario. The maps show the absolute changes with regards to the historical period (1971–2000) for the nine adjusted simulations.



**SM 138.** Changes in projected autumn means of monthly sums of precipitation by 2021–2050 assuming the RCP4.5 scenario. Relative changes between historical (1971-2000) and future (2020–2050) for all bias adjusted simulations assuming the RCP4.5.

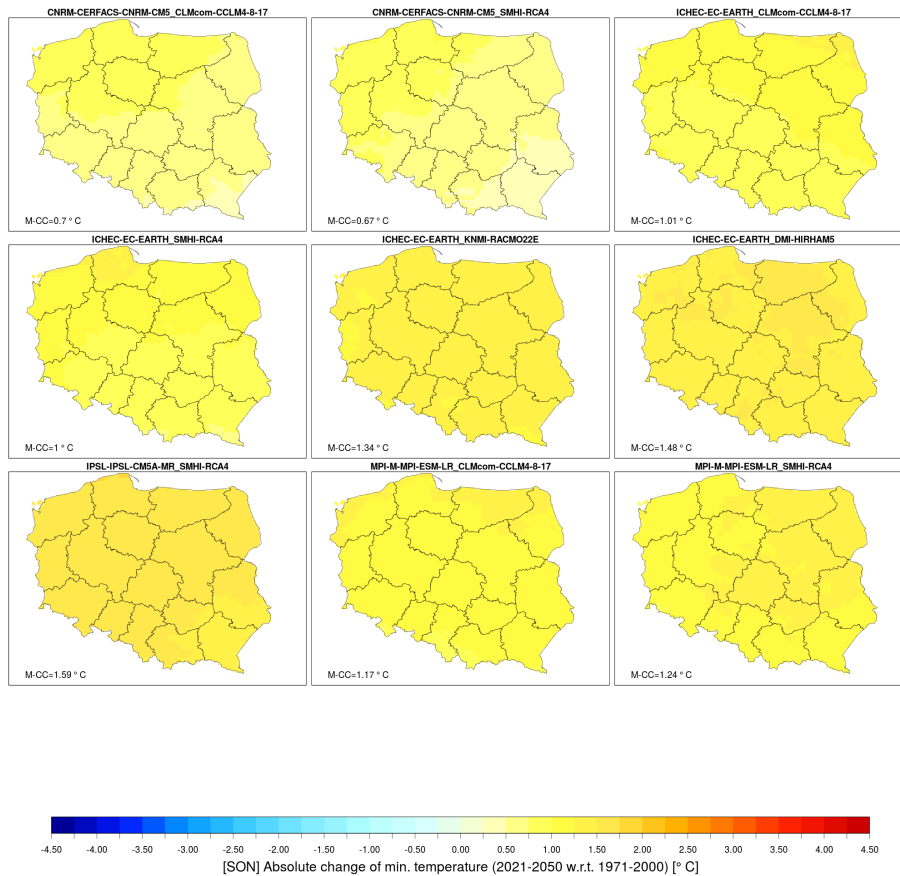

**SM 139.** Changes in projected autumn means of daily minimum temperature by 2021–2050 assuming the RCP4.5 scenario. The maps show the absolute changes with regards to the historical period (1971–2000) for the nine adjusted simulations.



**SM 140.** Changes in projected autumn means of daily maximum temperature by 2021–2050 assuming the RCP4.5 scenario. The maps show the absolute changes with regards to the historical period (1971–2000) for the nine adjusted simulations.



**SM 141.** Changes in projectd annual means of monthly sums of precipitation by 2021–2050 assuming the RCP4.5 scenario. The maps show relative changes with regards to the historical period (1971–2000) for all nine adjusted simulations.



**SM 142.** Changes in projected annual means of monthly sums of precipitation by 2071–2100 assuming the RCP4.5 scenario. The maps show relative changes with regards to the historical period (1971–2000) for all nine adjusted simulations.



**SM 143.** Changes in projected annual means of monthly sums of precipitation by 2071–2100 assuming the RCP8.5 scenario. The maps show relative changes with regards to the historical period (1971–2000) for all nine adjusted simulations.



**SM 144.** Changes in projected annual means of monthly sums of precipitation by 2021–2050 assuming the RCP8.5 scenario. The maps show relative changes with regards to the historical period (1971–2000) for all nine adjusted simulations.

### **5.3.7 Changes in seasonal means**



**SM 145.** Changes in projected annual means of monthly sums of precipitation by 2021–2050 assuming the RCP4.5 scenario. The maps show relative changes with regards to the historical period (1971–2000) for all nine adjusted simulations.

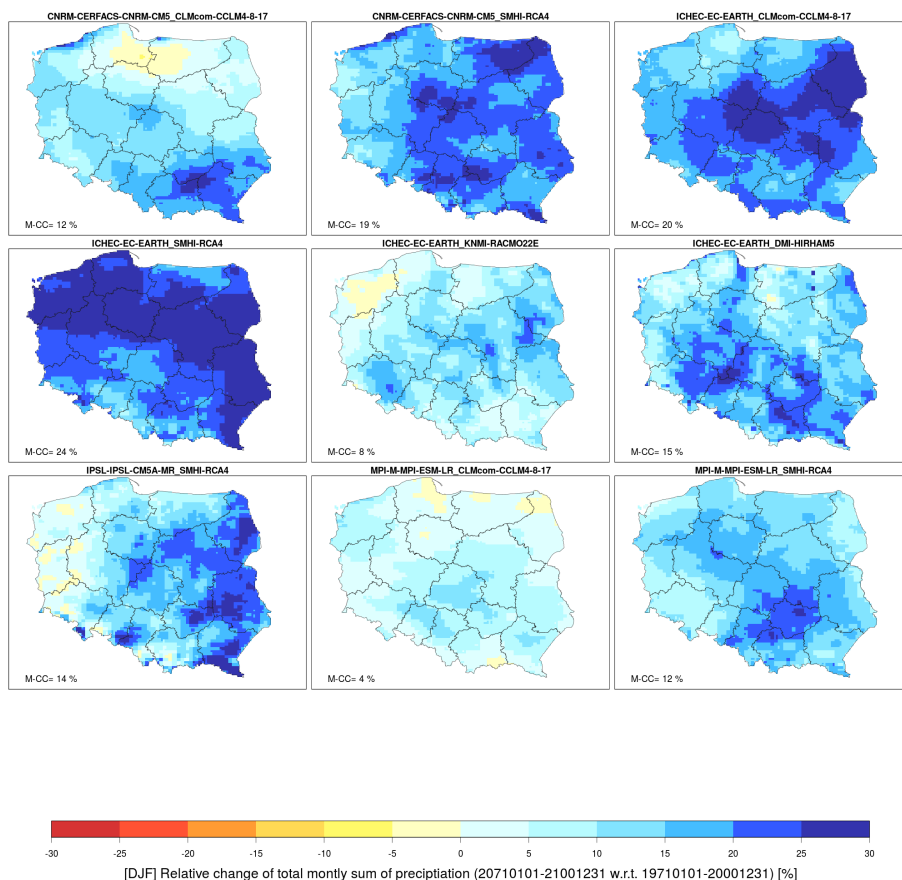

**SM 146.** Changes in projected annual means of monthly sums of precipitation by 2071–2100 assuming the RCP4.5 scenario. The maps show relative changes with regards to the historical period (1971–2000) for all nine adjusted simulations.



**SM 147.** Changes in projected annual means of monthly sums of precipitation by 2071–2100 assuming the RCP8.5 scenario. The maps show relative changes with regards to the historical period (1971–2000) for all nine adjusted simulations.

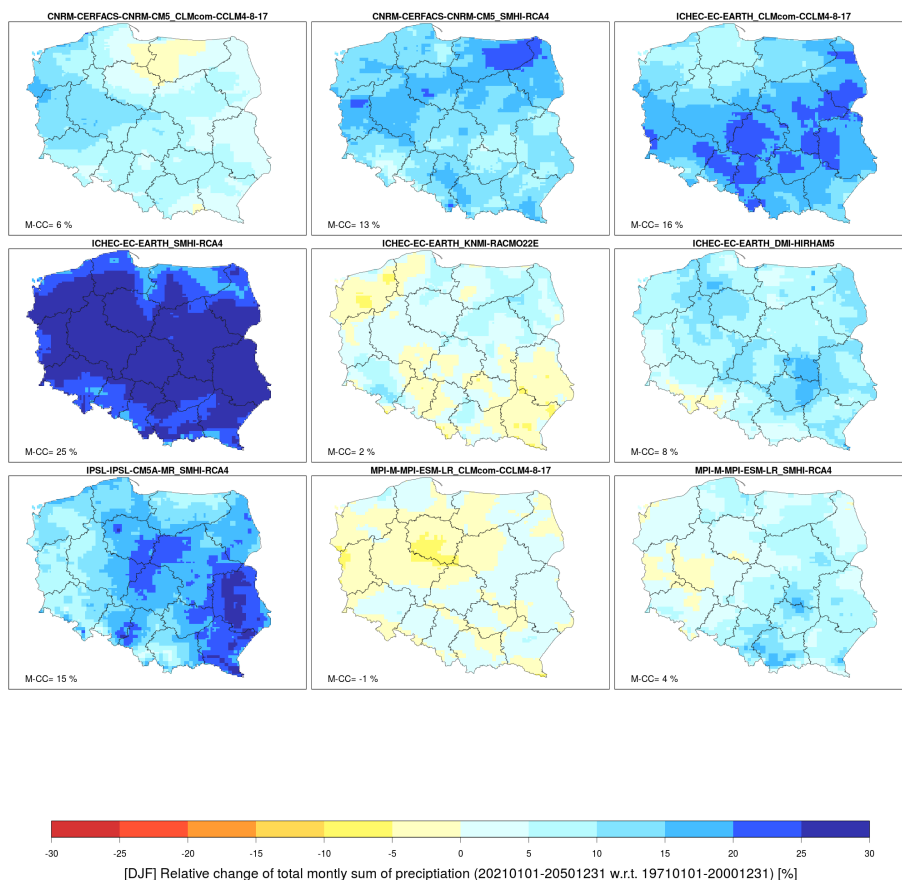

**SM 148.** Changes in projected annual means of monthly sums of precipitation by 2021–2050 assuming the RCP8.5 scenario. The maps show relative changes with regards to the historical period (1971–2000) for all nine adjusted simulations.



**SM 149.** Changes in projected annual means of monthly sums of precipitation by 2021–2050 assuming the RCP4.5 scenario. The maps show relative changes with regards to the historical period (1971–2000) for all nine adjusted simulations.

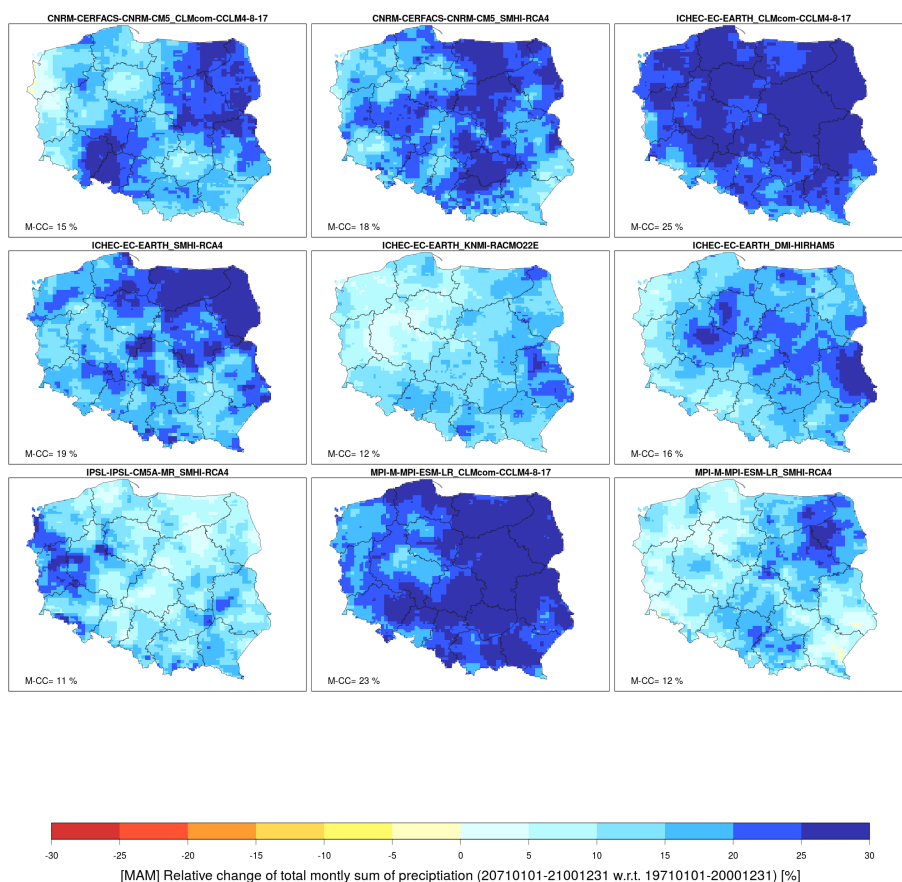

**SM 150.** Changes in projected annual means of monthly sums of precipitation by 2071–2100 assuming the RCP4.5 scenario. The maps show absolute changes with regards to the historical period (1971–2000) for all nine adjusted simulations.

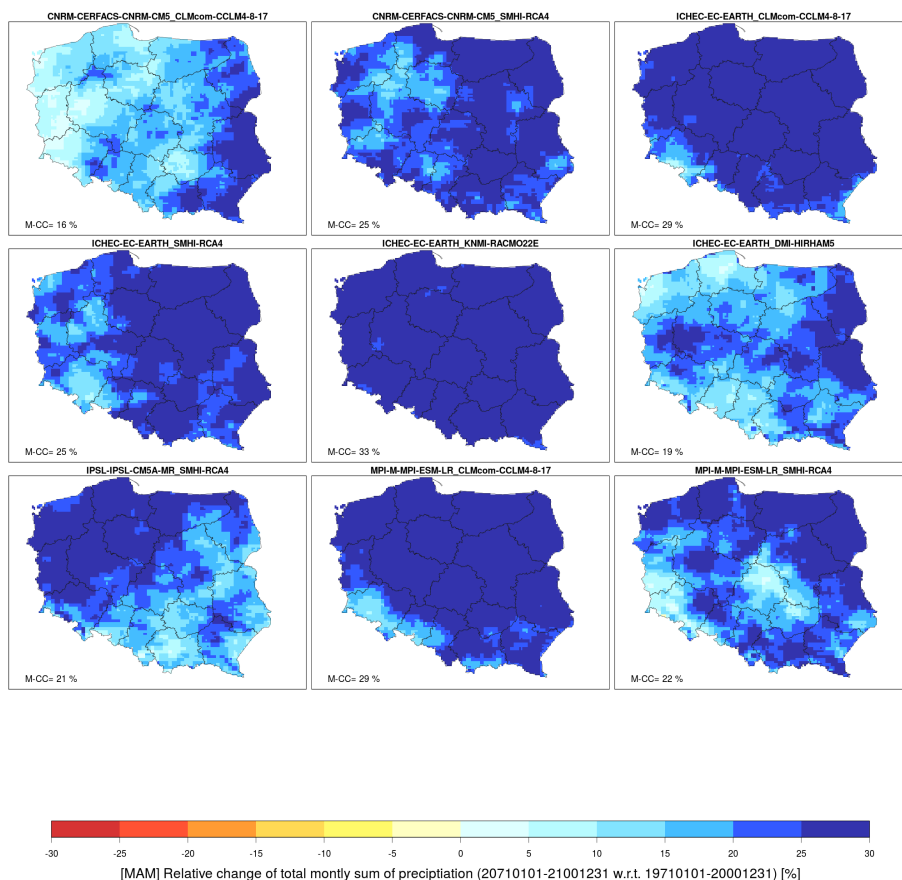

**SM 151.** Changes in projected annual means of monthly sums of precipitation by 2071–2100 assuming the RCP8.5 scenario. The maps show relative changes with regards to the historical period (1971–2000) for all nine adjusted simulations.

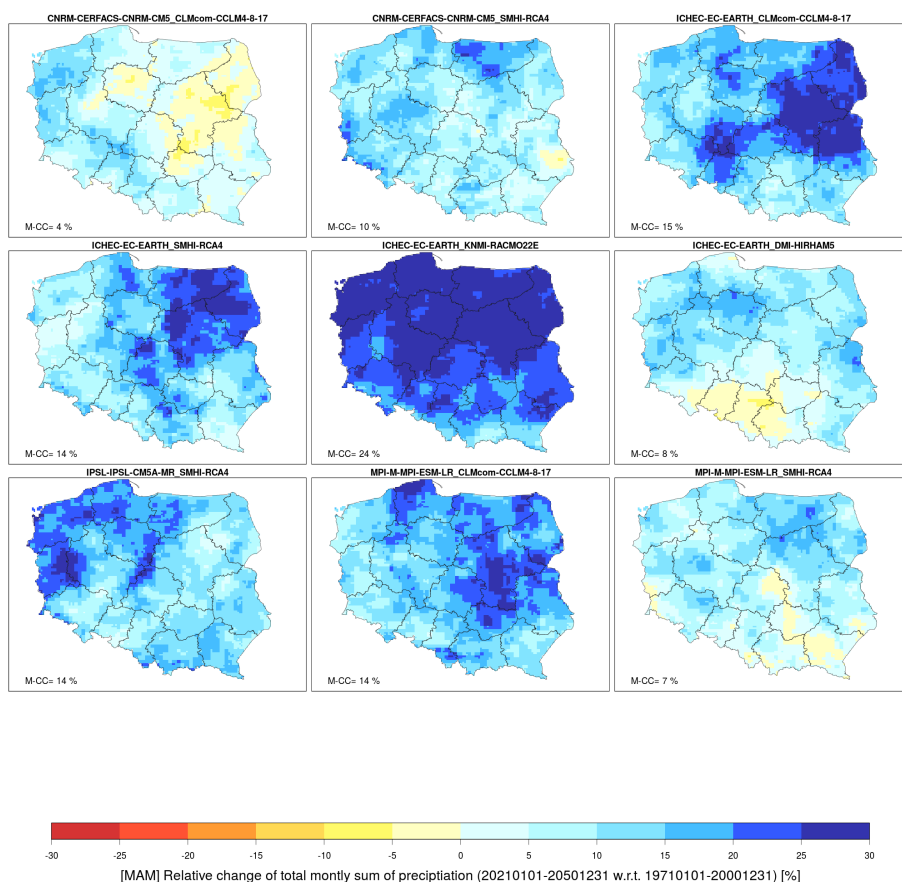

**SM 152.** Changes in projected annual means of monthly sums of precipitation by 2021–2050 assuming the RCP8.5 scenario. The maps show relative changes with regards to the historical period (1971–2000) for all nine adjusted simulations.



**SM 153.** Changes in projected annual means of monthly sums of precipitation by 2021–2050 assuming the RCP4.5 scenario. The maps show relative changes with regards to the historical period (1971–2000) for all nine adjusted simulations.



**SM 154.** Changes in projected annual means of monthly sums of precipitation by 2071–2100 assuming the RCP4.5 scenario. The maps show relative changes with regards to the historical period (1971–2000) for all nine adjusted simulations.



**SM 155.** Changes in projected annual means of monthly sums of precipitation by 2071–2100 assuming the RCP8.5 scenario. The maps show absolute changes with regards to the historical period (1971–2000) for all nine adjusted simulations.



**SM 156.** Changes in projected annual means of monthly sums of precipitation by 2021–2050 assuming the RCP8.5 scenario. The maps show relative changes with regards to the historical period (1971–2000) for all nine adjusted simulations.



**SM 157.** Changes in projected annual means of monthly sums of precipitation by 2021–2050 assuming the RCP4.5 scenario. The maps show relative changes with regards to the historical period (1971–2000) for all nine adjusted simulations.



**SM 158.** Changes in projected annual means of monthly sums of precipitation by 2071–2100 assuming the RCP4.5 scenario. The maps show relative changes with regards to the historical period (1971–2000) for all nine adjusted simulations.

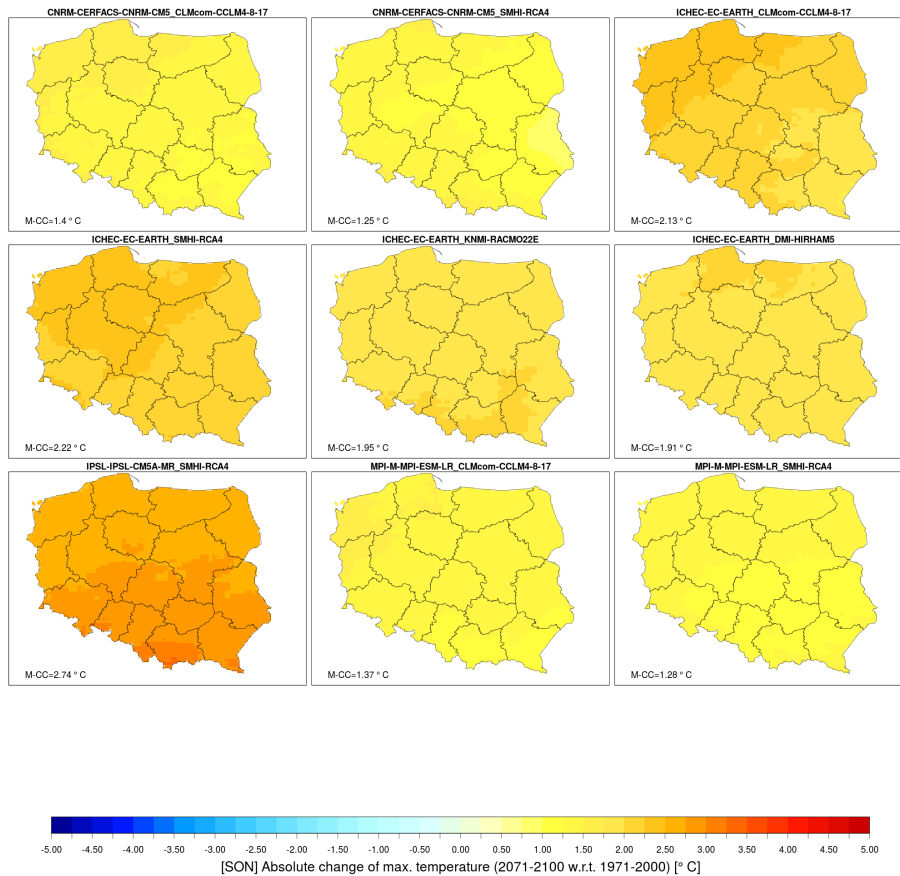

**SM 159.** Changes in projected annual means of monthly sums of precipitation by 2071–2100 assuming the RCP8.5 scenario. The maps show relative changes with regards to the historical period (1971–2000) for all nine adjusted simulations.



**SM 160.** Changes in projected annual means of monthly sums of precipitation by 2021–2050 assuming the RCP8.5 scenario. The maps show relative changes with regards to the historical period (1971–2000) for all nine adjusted simulations.

## **6 Data Provenance and Structure**

## 45 7 Competing interests

The authors declare that they have no conflict of interest.

## 8 Team list

J. E. Haugen designed the bias-adjust experiment and A. Dobler developed the model code and performed the corrections. A. Mezghani estimated the projected changes over Poland and prepared  
50 the manuscript with contributions from all co-authors.

*Acknowledgements.* We acknowledge the Polish–Norwegian Research Programme operated by the National Centre for Research and Development (NCBiR) under the Norwegian Financial Mechanism 2009–2014 to the financial support of the project CHASE-PL (Climate change impact assessment for selected sectors in Poland) in the frame of project contract no. Pol-Nor/200799/90/2014.
