# Supplementary material for: CHASE-PL Climate Projection dataset over Poland – Bias adjustment of EURO-CORDEX simulations
Source: Copernicus journal article supplement (doi:10.5194/essd-2017-51), 2017-07-19
Supplement: Supplementary file [file essd-2017-51-AC2-supplement.pdf]

Additional reply to Interactive comment on “CHASE-PL Climate Projection dataset over Poland – Bias adjustment of EURO-CORDEX simulations” by Abdelkader Mezghani et al.

J. Wibig (Referee)  
zameteo@uni.lodz.pl

Received and published: 23 August 2017

*We would like to thank the reviewer for her positive opinion regarding our paper. Hereafter, we address a point by point answer. Referee text is in grey and answers are in black justified text.*

*We hereby address additional modifications in the manuscript as requested by the reviewer but were not mentioned in the previous reply.*

Description of results is very well prepared, however some shortcomings also can be. When the projected temperatures are considered the increase of the annual mean temperature over Poland is presented for two periods separately, but in the case of seasonal values only one value is given for each season without information if they concern near or far future.

We also would like to withdraw the reviewer’s attention that we have developed more the subsections 4.1.1 related to projected temperature changes in the multi-model ensemble mean and section 4.2 related to changes in individual model simulations as well as the conclusions.

On all maps the boundaries of Poland should be added.

We updated all figures by adding Poland boundaries. We also improved the quality of all the maps as well as the font size of the legends.

Supplementary material is very rich. Contains almost 200 maps, but there is a lot of mistakes: some maps have wrong titles, the others are located in wrong places, some are doubled. I am giving only selected examples, but because of huge number of maps I am not able to check all of them.

The supporting material has been substantially modified. We added more details and inserted one table giving the full list of simulations (Same as Table 1, in the main manuscript). We also reorganised the different sections, improved the quality of all the figures, and corrected all figures captions. We also added more references to the SM in the main manuscript.

Finally, we would like to further thank the two reviewers for their constructive comments. Accordingly, we added the following statement into the acknowledgment.

*" Finally, we would like to thank the two reviewers Joanna Wibig and Mirosław Miętus for their respective positive and constructive comments that helped improving this manuscript. "*
